# Supplementary material for: Rabies mortality and morbidity associated with animal bites in Africa: a case for integrated rabies disease surveillance, prevention and control: a scoping review
Source: PubMed Central journal article supplement — BMJ Open. 2021 Dec 2;11(12):e048551. doi: 10.1136/bmjopen-2020-048551 (PMC8640643; doi:10.1136/bmjopen-2020-048551), 2021-12-02

# BMJ Open

BMJ Open is committed to open peer review. As part of this commitment we make the peer review history of every article we publish publicly available.

When an article is published we post the peer reviewers' comments and the authors' responses online. We also post the versions of the paper that were used during peer review. These are the versions that the peer review comments apply to.

The versions of the paper that follow are the versions that were submitted during the peer review process. They are not the versions of record or the final published versions. They should not be cited or distributed as the published version of this manuscript.

BMJ Open is an open access journal and the full, final, typeset and author-corrected version of record of the manuscript is available on our site with no access controls, subscription charges or pay-per-view fees (<http://bmjopen.bmj.com>).

If you have any questions on BMJ Open's open peer review process please email [info.bmjopen@bmj.com](mailto:info.bmjopen@bmj.com)

# BMJ Open

## Rabies mortality and morbidity associated with animal bites in Africa: A case for Integrated Rabies Diseases Surveillance, Prevention, and Control - A Scoping review

|                               |                                                                                                                                                                                                                                                                                                                                                                                                                                                                                                                                                                                                                                                                                                                                                                                                                                                                                                                                                                                                                                                                                                                                                                                     |
|-------------------------------|-------------------------------------------------------------------------------------------------------------------------------------------------------------------------------------------------------------------------------------------------------------------------------------------------------------------------------------------------------------------------------------------------------------------------------------------------------------------------------------------------------------------------------------------------------------------------------------------------------------------------------------------------------------------------------------------------------------------------------------------------------------------------------------------------------------------------------------------------------------------------------------------------------------------------------------------------------------------------------------------------------------------------------------------------------------------------------------------------------------------------------------------------------------------------------------|
| Journal:                      | <i>BMJ Open</i>                                                                                                                                                                                                                                                                                                                                                                                                                                                                                                                                                                                                                                                                                                                                                                                                                                                                                                                                                                                                                                                                                                                                                                     |
| Manuscript ID                 | bmjopen-2020-048551                                                                                                                                                                                                                                                                                                                                                                                                                                                                                                                                                                                                                                                                                                                                                                                                                                                                                                                                                                                                                                                                                                                                                                 |
| Article Type:                 | Original research                                                                                                                                                                                                                                                                                                                                                                                                                                                                                                                                                                                                                                                                                                                                                                                                                                                                                                                                                                                                                                                                                                                                                                   |
| Date Submitted by the Author: | 31-Dec-2020                                                                                                                                                                                                                                                                                                                                                                                                                                                                                                                                                                                                                                                                                                                                                                                                                                                                                                                                                                                                                                                                                                                                                                         |
| Complete List of Authors:     | <p>Nyasulu, P; Stellenbosch University, Global Health<br/> Weyer, Jacqueline ; NICD, Centre for Emerging Zoonosis and Parasitic Diseases<br/> Tschopp, Rea; Swiss Tropical and Public Health Institute; University of Basel<br/> Mihret, Adane; Armauer Hansen Research Institute<br/> Aseffa, Abraham; Armauer Hansen Research Institute,<br/> Nuvor, Samuel; University of Cape Coast, Department of Microbiology and Immunology<br/> Tamuzi, Jacques ; Stellenbosch University Faculty of Medicine and Health Sciences, Epidemiology<br/> Nyakarahuka, Like; Makerere University College of Health Sciences<br/> Helegbe , Gideon; University for Development Studies School of Medicine and Health Sciences<br/> Ntinginya, Nyanda; 6. National Institute of Medical Research-Mbeya Medical Research Centre<br/> Gebreyesus, Melaku ; Lilongwe University of Agriculture and Natural Resources<br/> Doumbia, Seydou; Université des Sciences, Techniques et Technologiques de Bamako, Faculté de Medecine et d'OdontoStomatologie<br/> Busse, Reinhard; Technische Universität Berlin, Health Care Management<br/> Drosten, Christian ; Charité Universitätsmedizin Berlin,</p> |
| Keywords:                     | EPIDEMIOLOGY, INFECTIOUS DISEASES, PUBLIC HEALTH                                                                                                                                                                                                                                                                                                                                                                                                                                                                                                                                                                                                                                                                                                                                                                                                                                                                                                                                                                                                                                                                                                                                    |
|                               |                                                                                                                                                                                                                                                                                                                                                                                                                                                                                                                                                                                                                                                                                                                                                                                                                                                                                                                                                                                                                                                                                                                                                                                     |

SCHOLARONE™  
Manuscripts

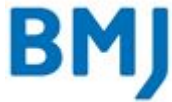

I, the Submitting Author has the right to grant and does grant on behalf of all authors of the Work (as defined in the below author licence), an exclusive licence and/or a non-exclusive licence for contributions from authors who are: i) UK Crown employees; ii) where BMJ has agreed a CC-BY licence shall apply, and/or iii) in accordance with the terms applicable for US Federal Government officers or employees acting as part of their official duties; on a worldwide, perpetual, irrevocable, royalty-free basis to BMJ Publishing Group Ltd ("BMJ") its licensees and where the relevant Journal is co-owned by BMJ to the co-owners of the Journal, to publish the Work in this journal and any other BMJ products and to exploit all rights, as set out in our [licence](#).

The Submitting Author accepts and understands that any supply made under these terms is made by BMJ to the Submitting Author unless you are acting as an employee on behalf of your employer or a postgraduate student of an affiliated institution which is paying any applicable article publishing charge ("APC") for Open Access articles. Where the Submitting Author wishes to make the Work available on an Open Access basis (and intends to pay the relevant APC), the terms of reuse of such Open Access shall be governed by a Creative Commons licence – details of these licences and which [Creative Commons](#) licence will apply to this Work are set out in our licence referred to above.

Other than as permitted in any relevant BMJ Author's Self Archiving Policies, I confirm this Work has not been accepted for publication elsewhere, is not being considered for publication elsewhere and does not duplicate material already published. I confirm all authors consent to publication of this Work and authorise the granting of this licence.

1 **Rabies mortality and morbidity associated with animal bites in Africa: A case for**  
2 **Integrated Rabies Diseases Surveillance, Prevention and Control - A Scoping review**

3  
4  
5  
6  
7  
8  
9  
10  
11 4 Authors: Peter Suwirakwenda Nyasulu<sup>1\*</sup>, Jacqueline Weyer<sup>2</sup>, Rea Tschopp<sup>3,4</sup>, Adane Mihret<sup>4</sup>,  
12  
13 5 Abraham Aseffa<sup>4</sup>, Samuel Victor Nuvor<sup>5</sup>, Jacques Lukenze Tamuzi<sup>1</sup>, Luke Nyakarahuka<sup>6</sup>, Gideon  
14  
15 6 Kofi Helegbe<sup>7</sup>, Nyanda Elias Ntinginya<sup>8</sup>, Melaku Tefera Gebreyesus<sup>9</sup>, Seydou Doumbia<sup>10</sup>,  
16  
17 7 Reinhard Busse<sup>11</sup>, Christian Drosten<sup>11</sup>.  
18  
19  
20  
21  
22

23 **Affiliation**

24  
25 10 <sup>1</sup>Division of Epidemiology & Biostatistics, Department of Global Health, Faculty of Medicine &  
26  
27 11 Health Sciences, Stellenbosch University, Cape Town, South Africa

28  
29  
30 12 <sup>2</sup>Centre for Emerging Zoonosis and Parasitic Diseases, NICD, NHLS, Johannesburg, South Africa  
31  
32 13 and Department for Medical Virology, University of Pretoria, Pretoria, South Africa

33  
34  
35 14 <sup>3</sup>Department of Epidemiology and Public Health, Swiss TPH, University of Basel, Switzerland

36  
37  
38 15 <sup>4</sup>The Armauer Hansen Research Institute (AHRI), Addis Ababa, Ethiopia.

39  
40  
41 16 <sup>5</sup>Department of Microbiology and Immunology, School of Medical Sciences, University of Cape  
42  
43 17 Coast, Cape Coast, Ghana

44  
45  
46 18 <sup>6</sup>Department of Biosecurity, Ecosystems and Veterinary Public Health, Makerere University,  
47  
48 19 Kampala, Uganda

49  
50  
51 20 <sup>7</sup>Department Biochemistry and Molecular Medicine, School of Medicine and Health Sciences,  
52  
53 21 University for Development Studies, Tamale, Ghana

1  
2  
3 22 <sup>8</sup>Mbeya Medical Research Centre, National Institute of Medical Research, Tanzania  
4  
5

6 23 <sup>9</sup>Department of Veterinary Medicine, Lilongwe University of Agriculture and Natural Resources,  
7  
8 24 Lilongwe, Malawi  
9  
10

11 25 <sup>10</sup>Department of Public Health, Faculty of Medicine, University of Bamako, Mali  
12  
13

14 26 <sup>11</sup>Institute of Virology, Charité Global Health, Charité - Universitätsmedizin Berlin, Campus  
15  
16 27 Charité Mitte, Germany  
17  
18

19  
20 28  
21  
22

23  
24 29 **\*Corresponding Author:** Peter S Nyasulu, Division of Epidemiology, Faculty of Medicine and  
25  
26 30 Health Sciences, Stellenbosch University, Cape Town, South Africa. Email: [pnyasulu@sun.ac.za](mailto:pnyasulu@sun.ac.za)  
27  
28

29 31  
30  
31  
32  
33  
34  
35  
36  
37  
38  
39  
40  
41  
42  
43  
44  
45  
46  
47  
48  
49  
50  
51  
52  
53  
54  
55  
56  
57  
58  
59  
60

## 32 **Abstract**

### 33 **Objective**

34 The objective of this scoping review was to map the current situation and available evidence and  
35 gaps on rabies morbidity, mortality, integrated rabies surveillance programs, and existing  
36 prevention and control strategies in Africa.

### 37 **Methods**

38 We conducted a systematic scoping review following the Joanna Briggs methodology and  
39 PRISMA-ScR checklist. Medline, EMBASE, Cinahl (EBSCOHost), Scopus, Web of Science and  
40 rabies web conferences were used to search for peer-reviewed publications between January 1946-  
41 May 2020. Two researchers reviewed the studies and extracted data based on author (year) and  
42 region, study design and data collection duration, Participants / Comparators, Interventions and  
43 Control Conditions / Exposures, outcomes (rabies mortality and morbidity) and Key Findings /  
44 Gaps / Challenges. The results were reported narratively using Arksey methodological framework.

### 45 **Results**

46 Electronic search yielded 2775 records, of which 43 studies were included. A total of 543,714 bite  
47 victims were censored through the included studies. Most of the victims were less than 15 years  
48 of age. The studies included, rabies morbidity (21) and mortality (15) fluctuating in space and time  
49 across Africa depending on countries rabies prevention and control practices (16). Others were  
50 surveillance (nine studies), surveillance and prevention (five studies), management and control  
51 (seven studies) and surveillance, prevention and control (six studies). We found challenges in

1  
2  
3 52 rabies reporting, existing dog vaccination programs and post-exposure prophylaxis availability or  
4  
5 53 compliance.  
6  
7  
8

9 54 **Conclusion**

10  
11  
12 55 This study found challenges for dog rabies control and elimination in Africa and the need for a  
13  
14 56 policy to drive the goal of zero dog-transmitted human rabies by 2030.  
15  
16  
17

18 57 *This is an open access article distributed in accordance with the Creative Commons Attribution*  
19  
20 58 *Non Commercial (CC BY-NC 4.0) license, which permits others to distribute, remix, adapt, build*  
21  
22 59 *upon this work non-commercially, and license their derivative works on different terms, provided*  
23  
24 60 *the original work is properly cited, appropriate credit is given, any changes made indicated, and*  
25  
26 61 *the use is non-commercial. See <http://creativecommons.org/licenses/by-nc/4.0/>*

27 62 **Key words:** One-Health; rabies; mortality; morbidity; surveillance; zoonosis; neglected tropical  
28  
29 63 disease; Africa  
30  
31 64

1  
2  
3 65 **Strengths and limitations of this study**  
4

- 5 66 • We conducted an extensive search of published and grey literature to identify studies to  
6  
7 include in the scoping review  
8 67  
9  
10 68 • Pulling together data from both published and grey literature gave us an opportunity to  
11  
12 understand the breadth of rabies epidemiology and how surveillance would be a critical  
13 69  
14 tool in implementing effective control of rabies across Africa  
15 70  
16  
17 71 • We conducted screening of identified articles and extraction of data in duplicate  
18  
19  
20  
21 72 • We reported the results narratively as it was not possible to combine data from different  
22  
23 studies conducted using different study designs, and different population groups.  
24 73  
25  
26 74

27  
28  
29  
30  
31  
32  
33  
34  
35  
36  
37  
38  
39  
40  
41  
42  
43  
44  
45  
46  
47  
48  
49  
50  
51  
52  
53  
54  
55  
56  
57  
58  
59  
60

Review only



## 1. Background

The natural history of rabies disease in Africa is not well known, but it is well accepted that the disease must have been present in northern Africa for hundreds of years, particularly as an urban dog disease and also associated with cycles in the Middle East [1]. European colonization influenced the spread of dog rabies in Western and Central Africa [2]. In many sub-Saharan African countries, rabies has become epizootic only in the nineteenth and twentieth centuries involved domestic dogs and free-ranging wildlife species [1-3]. Historically, isolation and epidemiological analysis of these viruses has primarily been associated with research studies and was strongly dependent on available laboratory diagnostic capacity and research group interest [3-4]. A thorough study of the phylogeographic structure of the African lineage-2 revealed strong population subdivisions at country level, with minimal transmission of virus between localities [5]. The molecular epidemiology of rabies virus (RABV) in Africa identified three phylogenetic RABV lines: Africa 1, 2 and 3 [6]. RABV strains from Central and North Africa clustered into Africa 1a and 4 lineages, while those from Southern African countries clustered in Africa 1b and 3 clades [5]. However, all RABV variants were homogeneous and closely related (99 per cent sequence homology), indicating a shared common origin distinct from the out-of-group group [5-7]. The divergence was assumed to represent different progenitor viruses. Africa 1 and 2 lineages were isolated from dogs or humans bitten by feral dogs, while Africa 3 lineages were found to be associated with mongoose species, primarily yellow mongoose (*Cynictis penicillata*) from the Republic of South Africa [6]. The Africa 1 lineage was subdivided into two subgroups: 1a, limited to North and West Africa; and 1b, limited to South East Africa. In general, the Africa 1 lineage was the most similar to the current Eurasian RABV lineage, indicating its recent introduction to Africa [6-8]. The Africa 2 lineage contains wild-type strains originating from many Central and

1  
2  
3 98 Eastern African countries and is phylogenetically ancestral to the Eurasian and African 1 RABV  
4  
5 99 clusters [6]. The ancestry of Africa 3, of mongoose origin, is distant from all variants of the dog  
6  
7  
8 100 RABV [6].  
9

10  
11 101 Dog rabies predominates throughout most of Africa; the domestic dog is the principal reservoir  
12  
13 102 host as well as the most important source of infection for people [9]. In addition, there are many  
14  
15 103 other lyssaviruses (also referred to as rabies-related viruses) reported from African countries. Most  
16  
17 104 of these rabies-related viruses have been associated with obscure hosts including specific bat  
18  
19 105 species and shrews, partly attribute to the difficulty in bio-surveillance of these viruses. RABV  
20  
21 106 however, spreads in terrestrial mammalian hosts in Africa and has not been associated with bat  
22  
23 107 infections as it is the case in the Americas. While all mammals (domestic and wild) are susceptible  
24  
25 108 to RABV infection, some are able to retain those virus variants adapted to their species whilst  
26  
27 109 others are only reported as dead-end hosts [10]. Rabies has been reported in both domesticated  
28  
29 110 species and wildlife. These are sometimes diagnosed with rabies virus infection in Zambia, South  
30  
31 111 Africa, Ethiopia, Kenya, Tanzania, Zimbabwe and Egypt [10-16].  
32  
33  
34  
35  
36  
37

38 112 Most reported cases of rabies in wild carnivorous species included yellow mongoose (*Cynictis*  
39  
40 113 *penicillata*) and bat-eared fox (*Otocyon megalotis*) [17] as well as critically endangered wild dogs  
41  
42 114 (*Lycaon pictus*) [18-21]. In Ethiopia, rabies outbreaks were described in the endangered Ethiopian  
43  
44 115 wolf (*Canis Simensis*) population [22-23]. In 2014 and 2015, RABV infection was also observed  
45  
46 116 in two wild dogs and a spotted hyaena (*Crocuta crocuta*) in the Madikwe Game Reserve, North  
47  
48 117 West Province of South Africa, in Ethiopia and in Nigeria [16,21,24], monkeys and jackals (*Canis*  
49  
50 118 *adustus* and *Canis mesomelas*) [11,12, 15-16]. The review of twenty studies across Africa has  
51  
52 119 revealed that bite victims account for 91.9% (48092 dog bites), cat bite for 2.9%, jackal bite for  
53  
54  
55  
56  
57  
58  
59  
60

1  
2  
3 120 0.8% and 4.41% others (monkey, donkey, horse, rat, pig, rabbit, Honey badger, kudu, goat, cattle,  
4  
5 121 eland and hyena) [25-44].  
6  
7

8  
9 122 More than 59 000 people die of rabies worldwide every year [45-46], 99% of them in African and  
10  
11 123 Asian countries where dog rabies is endemic [45, 47-51]. Due to the lack of laboratory  
12  
13 124 confirmation, sporadic epidemiologic surveillance, and unreported clinical cases in developing  
14  
15 125 countries, current mortality estimates almost certainly under-represent the true incidence of human  
16  
17 126 rabies deaths [45, 49-51]. Rabies is responsible for an estimated 21,000-25,000 death annually in  
18  
19 127 Africa [45, 52-53]. Figure 1 shows a map illustrating rabies distribution in thirty-two African  
20  
21 128 countries considering rabies outbreaks in animals, cases and deaths in humans [54]. In 2011, a  
22  
23 129 total of 33 African countries reported 1,607 outbreaks of rabies, 2,779 cases and 1,524 deaths [54].  
24  
25 130 Data shows that rabies accounts for 7.2% of all animal disease outbreaks reported making it the  
26  
27 131 disease with the highest number of outbreak reports in Africa in 2011 [54]. Algeria, Namibia,  
28  
29 132 Eswatini (former Swaziland), Tunisia, Uganda, Zambia and Zimbabwe reported high morbidity  
30  
31 133 and mortality with 563 cases (33.9% deaths), 269 (94% deaths), 62 cases (88.7% deaths), 91 cases  
32  
33 134 (90% deaths), 466 cases (40.9%), 207 cases (32.8% deaths) and 114 cases (80.7% deaths)  
34  
35 135 respectively [54].  
36  
37  
38  
39  
40  
41

42 136 Mass vaccination of dogs as a key component of national rabies elimination programs has been  
43  
44 137 successful in eliminating dog-transmitted rabies in Europe, North and Latin America, and Japan  
45  
46 138 [55-57]. By far, the most significant public health threat comes from RABV, and over 99% of all  
47  
48 139 globally reported human cases are caused by exposure to unvaccinated dogs infected with canine  
49  
50 140 RABV variant, mostly in Asia and Africa [58].  
51  
52  
53  
54  
55  
56  
57  
58  
59

1  
2  
3 141 In most of Africa, and specifically western and central African countries, notification of rabies  
4  
5 142 disease is not mandatory, so epidemiological data are scarce [60]. Human rabies could be  
6  
7  
8 143 prevented by the immediate administration of post-exposure prophylaxis (PEP) following  
9  
10 144 exposure to rabid animals [46, 60]. However, people in low-income countries often do not receive  
11  
12 145 these life-saving treatments because either PEP treatment is costly and not readily available, or  
13  
14 146 because of lack of rabies awareness, people might not go to hospital for treatment [46, 50, 61].  
15  
16 147 The lack of effective educational outreach at community level had led to gaps in knowledge as to  
17  
18 148 the best way to avoid animal bites and administer first aid following bites or other potential rabies  
19  
20 149 exposures [62]. A recent study has shown considerable in-country variability in the availability of  
21  
22 150 rabies vaccines and immunoglobulins vaccine supply system, administration route (IM versus SC),  
23  
24 151 cost of vaccine and rabies immunoglobulin (RIG). In a global survey conducted in rabies endemic  
25  
26 152 countries, 49 of the 54 African countries were rated as moderate to high risk for human rabies,  
27  
28 153 whilst 16 of the 23 countries that responded to the survey had inadequate surveillance systems [53,  
29  
30  
31 154 63].  
32  
33  
34  
35

36 155 One major barrier is the difficulty of consistently achieving the required coverage of 70% of the  
37  
38 156 dog population across the hard-to-reach landscapes that characterize much of sub-Saharan Africa  
39  
40 157 [64-66]. Reviewing dog vaccination coverage in African countries, only South Africa, Tanzania,  
41  
42 158 Algeria, Morocco and Egypt had the dog vaccination coverage of 63%, 37.24%, 23.7%, 25% and  
43  
44 159 23.7% respectively [67,68]. In all other African countries dog vaccination coverage was below  
45  
46 160 18% with further below 5% in some cases [67]. The analysis of the above data and the  
47  
48 161 consideration of the framework for the elimination of dog rabies suggested by Wallace 2017 and  
49  
50 162 others stipulated the existing coverage of dog rabies vaccination, was directly associated with the  
51  
52 163 number of years it would take to achieve rabies elimination [69]. Theoretically, Global Dog Rabies  
53  
54  
55  
56  
57  
58  
59

1  
2  
3 164 Elimination Route (GDREP) consisting of a 13-year timeframe would be ample time for even the  
4  
5 165 least developed rabies prevention systems to achieve elimination by 2030 if completely committed  
6  
7  
8 166 to this achievement [69]. This system divided countries into three categories: (1) Phase I:  
9  
10 167 preparation (dog vaccination > 18%), (2) Phase II: vaccination of dogs (dog vaccination: < 18%  
11  
12 168 and > 70%) and (3) Phase III: 70% continued vaccination of dogs. African countries have been  
13  
14  
15 169 categorized into phase I, II, III but with no data on dog vaccination [70]. The available data indicate  
16  
17 170 that most African countries were still at the preparation phase since “zero rabies by 2020” was  
18  
19 171 initiated five years ago. Although the feasibility of reaching 70% dog vaccination coverage has  
20  
21 172 been shown through pilot projects in a wide range of settings. African countries still struggle to  
22  
23 173 achieve a 70% yearly dog vaccination rate [9, 51]. In Africa, dog mass vaccination systems have  
24  
25 174 demonstrated some effectiveness as proof of principle, as in KwaZulu-Natal, South Africa [ 55-  
26  
27 175 71], Serengeti, Tanzania [55,72-73], Malawi [55,75] and Chad [ 61, 76-78].  
28  
29  
30  
31  
32 176 Inadequate education for veterinarians and physicians, insufficient resources for proper  
33  
34 177 confirmatory diagnosis and risk assessment, and the lack of effective communication channels  
35  
36 178 between ministries of health and agriculture frequently have led to failures of prophylactic  
37  
38 179 intervention, even in regions where vaccines and immunoglobulins were available [62]. A recent  
39  
40 180 study conducted in Africa and Asia revealed that rabies immunoglobulins were found to be less  
41  
42 181 available than the vaccine, with access restricted in almost two-thirds of the countries surveyed  
43  
44 182 [79]. Eleven (11) African countries had comprehensive access to RIG. Of the seven countries with  
45  
46 183 broad access to vaccines, 6 of them had a national rabies prevention program or policy. Two of  
47  
48 184 the countries had only a monitoring program / strategy in place [79]. This is worrisome as it  
49  
50 185 exposes a huge absence of surveillance and prevention policies in most African countries. The  
51  
52 186 absence of a robust monitoring process is mostly attributed to the lack of rabies in national  
53  
54  
55  
56  
57  
58  
59  
60

1  
2  
3 187 communicable disease plans and reporting systems at national level in Africa [80]. Therefore,  
4  
5 188 widespread underreporting is likely to occur in many affected countries due to lack of health  
6  
7 189 information, civil registration and vital statistical systems, and inaccessibility of clinical care and  
8  
9  
10 190 diagnostic confirmation [80] as symptoms of the disease may be non-specific and similar to other  
11  
12 191 encephalitic infections. Even where data exist in Africa, the lack of communication and exchange  
13  
14 192 of data between the animal and human health sectors also hinders the collection, storage and  
15  
16 193 reporting of coherent data to international data bases [80]. The World Health Organization (WHO)  
17  
18 194 meeting in Geneva in 2018 on "Moving Progress towards Rabies Elimination" pointed out that  
19  
20 195 political engagement is a key factor with governments providing leadership role in the coordination  
21  
22 196 of elimination strategies [53]. The global collection of data on deaths from any neglected disease  
23  
24 197 is a huge challenge, and early attempts to collate data for human deaths from canine rabies were  
25  
26 198 no exception [81]. Due to the lack of regular reporting of rabies cases to the WHO from many  
27  
28 199 member states, the RabNet database was closed down in 2011[82]. Therefore, rabies is not  
29  
30 200 reportable in many African countries, which restricts data collection by structured surveillance  
31  
32 201 systems [80]. One Health evolved from the recognition that an interdisciplinary approach is  
33  
34 202 required to understand complex health problems, and that the health of humans and animals is  
35  
36 203 inextricably linked [83]. Rabies requires a comprehensive, strategic, and targeted control and  
37  
38 204 prevention approach with collaboration from human, animal, and environmental health disciplines  
39  
40 205 at local, national, and global levels to achieve more effective control [84]. The review of literature  
41  
42 206 reveals that most of African countries lack a One Health approach to prevent human rabies deaths.  
43  
44  
45  
46  
47  
48  
49  
50 207 The WHO, the World Organization for Animal Health (OIE), the Food and Agriculture  
51  
52 208 Organization (FAO) and the Global Alliance for Rabies Control (GARC) have developed a  
53  
54 209 strategic global plan to end human canine-mediated rabies by 2030 [48, 53, 85]. This initiative  
55  
56  
57  
58  
59

1  
2  
3 210 provides a concerted approach to the prevention of rabies, combined with the strengthening of  
4  
5 211 human and veterinary health systems. These would enable reaching out to the most underserved  
6  
7 212 communities in the world by engaging, encouraging and supporting all countries to lead and  
8  
9 213 improve elimination efforts [80]. This scoping review was therefore designed to map the evidence  
10  
11 214 on rabies morbidity, mortality, integrated rabies surveillance, prevention and control in African  
12  
13 215 countries. Its objectives were: (1) to assess the extent of available research on the morbidity and  
14  
15 216 mortality of rabies due to animal bites conducted in Africa, (2) to identify research gaps in the  
16  
17 217 literature on the impact of rabies in Africa so as to effectively plan public health intervention, (3)  
18  
19 218 to ascertain the current level of rabies disease surveillance, prevention and control that exists in  
20  
21 219 African countries, (4) to assess the published adverse events and complications associated with  
22  
23 220 rabies vaccination in African countries, (5) to assess the different types of vaccines used and the  
24  
25 221 effectiveness of locally produced and imported vaccines in treating rabies in different parts of  
26  
27 222 Africa, (6) to assess rabies morbidity and mortality associated with dog and livestock bites in  
28  
29 223 humans and animals' population.  
30  
31  
32  
33  
34  
35

## 36 224 **2. Methodology**

### 37 225 **2.1. Study design**

38  
39  
40  
41  
42  
43 226 This paper used the PRISMA-ScR checklist [86] and The Joanna Briggs Institute guidelines [87]  
44  
45 227 as a norm for reporting scoping review. The analysis was conducted in accordance with the  
46  
47 228 structure suggested by [88], further developed by [89].  
48  
49  
50

### 51 229 **2.2. Eligibility criteria**



1  
2  
3 230 The search was conducted from 1 January 1946 until 30 May 2020. A PICO (Population-  
4  
5 231 Interventions-Comparisons-Outcomes) search framework was set, where P (Humans infected with  
6  
7 232 rabies in African countries), I (Integrated rabies disease surveillance, prevention and control), C  
8  
9 233 (little or no integrated rabies disease surveillance, prevention and control) and O (reduced human  
10  
11 234 morbidity and mortality of rabies associated with animal bites) were chosen. The included studies  
12  
13  
14  
15 235 are described in Table 1.

### 18 236 **2.3. Electronic search**

21 237 We conducted a systematic search of the electronic databases Medline (OVID), EMBASE  
22  
23 238 (OVID), Cinahl (EBSCOHost), Scopus (Elsevier), Web of Science and Conference  
24  
25 239 (*rabiesalliance.org*, *www.who-rabies-bulletin.org* and *www.oie.org*). The search techniques were  
26  
27 240 limited to English. The main search strategy was listed in supplementary material 1. EndNote X9  
28  
29 241 reference manager was used to remove duplicates. JLT reviewed all the papers identified by title  
30  
31 242 in order to pick those that were potentially appropriate, with a clear bias towards retention. The  
32  
33 243 abstracts of all the studies chosen on the basis of their titles were independently reviewed by two  
34  
35 244 reviewers (PSN and JTL) and any variations were preserved in the study.

### 41 245 **2.4. Data charting process**

44 246 For all studies selected at the abstract level, data were extracted and plotted in the table, covering  
45  
46 247 author (year) and region, study design and data collection duration, Participants / Comparators,  
47  
48 248 Interventions and Control Conditions / Exposures, outcomes (rabies mortality and morbidity) and  
49  
50 249 Key Findings / Gaps / Challenges. The final decision to include studies was taken on the basis of  
51  
52 250 this data extraction and whether it met the inclusion / exclusion requirements, based on an  
53  
54  
55  
56  
57  
58  
59



1  
2  
3 251 independent review by two authors (PSN and JLT) and a discussion of any differences; the third  
4  
5 252 author (RT) was available for consultation if consensus could not be reached. Our inclusion criteria  
6  
7  
8 253 were: rabies occurrence or mortality rates, all ages included, only studies performed in Africa,  
9  
10 254 studies in which at least one intervention included monitoring, prevention and control of rabies,  
11  
12 255 and then only quantitative studies were included in this study.  
13  
14

15  
16 256 A data extraction sheet has been developed and used to extract data from included papers. The  
17  
18 257 data collection sheet included: author, region, year, study design, level of evidence, sample size  
19  
20 258 description, interventions or exposures, results and key findings / Gaps / Challenges. Two  
21  
22 259 reviewers (PSN & JLT) worked separately at all levels of the study. The results were then  
23  
24 260 compared and any variations were addressed and resolved by PSN and JLT. The third author (RT),  
25  
26 261 who also summarized the findings, was consulted when a discrepancy could not be resolved. The  
27  
28 262 evaluation of the probability of bias, the methodological standard of the included studies was not  
29  
30 263 assessed due to the scoping review of the study [88].  
31  
32  
33  
34

### 35 264 **2.5. Data items**

36  
37  
38 265 Seven items were listed in the data collection chart table. We included the first author, the year of  
39  
40 266 publication of the study and the country (item 1). Study design and period of data collection (item  
41  
42 267 2). The sample size, mean or median age and gender (item 3). The intervention and control  
43  
44 268 conditions / exposures included surveillance, prevention and control of rabies and any other form  
45  
46 269 of intervention used in human rabies (item 4). The number or rate of human rabies morbidity  
47  
48 270 included annually or during the study period (item 5). Human rabies mortality recorded the death  
49  
50 271 or mortality rate annually or during the study period (item 6). Main findings / gaps / challenges  
51  
52  
53  
54  
55  
56  
57  
58  
59  
60

1  
2  
3 272 included other outcomes such as data gaps found, available research evidence as well as PEP or  
4  
5 273 vaccine adverse events (item 7).  
6  
7

## 9 274 **2.6. Critical appraisal of individual sources of evidence**

10  
11  
12 275 Methodological quality of included studies was not evaluated due to the scoping nature of the  
13  
14  
15 276 review [84].  
16  
17

## 18 277 **2.7. Synthesis of results**

19  
20  
21 278 Studies were summarized based on author (year) and country, study designs, participants and  
22  
23 279 comparator, interventions and control conditions/exposures, key outcomes, gaps, findings and  
24  
25 280 challenges. Interventions were subdivided into rabies prevention, surveillance, control and  
26  
27 281 management. Table, computed morbidity and mortality rates in case there were not clearly  
28  
29 282 provided and then we reported the results narratively, as recommended in scoping review were  
30  
31 283 methodological framework [88].  
32  
33  
34  
35

## 36 284 **3. Results**

### 37 285 **3.1. Study selection**

38  
39  
40  
41  
42  
43 286 The searches from the five electronic databases hit a total of 2775 records (Medline: 696, Embase:  
44  
45 287 952, CINAHL: 289, Scopus: 431 and Web of science: 407) that led to a total of 1127 titles and  
46  
47 288 abstracts that were screened after the removal of duplicates. We retained 111 of these based on  
48  
49 289 their title and abstract screening. The full-text screening's stage led to 43 potential articles relevant  
50  
51 290 to our scoping review. The scoping review flow chart was described in Figure 2.  
52  
53  
54  
55  
56  
57  
58  
59  
60

291

### 292 3.2. Study characteristics

293 The review reported only quantitative studies on rabies surveillance, prevention and control.  
294 Thirty-two quantitative studies were retrospective cohort with 8 month to 14 years of study  
295 duration [16, 25-27, 29, 30, 32,34-42, 44, 90-104], three studies were mixed designs (retrospective  
296 and cross-sectional study) [43,105,106], three prospective cohort studies [28,31, 107], two Cross-  
297 sectional studies [108,109], one case control [33], one clinical trial [110] and a randomized control  
298 trial [111].

299 We grouped the included studies into five categories based on rabies interventions, namely 1)  
300 prevention and control, 2) surveillance, 3) surveillance and prevention, 4) treatment and control,  
301 and 5) surveillance, prevention and control. Figure 3 showed the distribution of studies according  
302 to the intervention in nineteen African countries. We also summarized all studies included in the  
303 final analyses in Table 1 which included seven parts in line with the specified frameworks for data  
304 synthesis: (1) rabies morbidity, (2) rabies mortality, (3) interventions for rabies control, (4) rabies  
305 disease surveillance, prevention and control, (5) available research evidence, (6) research gaps  
306 identified and (7) adverse events and complications associated with rabies vaccination.

### 307 3.3. Patient characteristics

308 A total of 543,714 bite victims were recorded in included studies. Age and sex-specific distribution  
309 revealed that the most fatal cases belonged to age groups 0-14 year [25, 29, 31, 34, 39, 41, 42, 44,  
310 90, 97, 98, 100,102, 106, 108]. Other studies identified rabies victims of 15 and above [26, 34, 35,  
311 38, 42, 90, 101, 102, 106, 109]. The median age was 18 years in most of the studies and ranged

1  
2  
3 312 from one to 95 years. Most of the children were males [41, 42, 100, 102]. However, other study  
4  
5 313 has indicated that females have more animal-related bites than males [25]. Young children are at  
6  
7 314 higher risk of contracting rabies in the absence of treatment due to the location of the bites they  
8  
9 315 receive [108]. Based on the extent and depth of injury, 1, 567 victims were recorded. Extent and  
10  
11 316 depth of injury was classified as skin broken (11.1 %), scratch (9.25 %), superficial (loss of  
12  
13 317 epidermis only) (36.38 %), deep (27.31 %) and simple (affect only one tissue) (12.38 %)  
14  
15 318 [25,27,107,109]. Further 10, 006 bites were described in regard of the site of exposure among  
16  
17 319 which the head/neck/face (5.08%), leg/feet (61.06%), arm/hand (23.23 %), buttocks/trunk (10.32  
18  
19 320 %) or multiple (0.31%) [25-29, 38, 43, 99, 101, 105, 108].

20  
21  
22 321 Individuals suspected to have rabies were clinically managed by the chief doctor pediatricians and  
23  
24 322 nurses [28, 32, 33, 36, 90, 100, 105, 109]. The main treatments were wound management,  
25  
26 323 antibiotics, prophylaxis against tetanus and rabies. Reports were collected in hospitals, treatment  
27  
28 324 and health centres, health clinics, pharmacies and veterinary clinics [109].

### 325 **3.4. Study outcomes**

#### 326 **3.4.1. Rabies morbidity**

327 Twenty-one studies reported rabies human morbidity in Africa (Table 2) [26, 30-35, 37, 39, 42,  
328 44, 90, 92, 94-98, 103, 105-107, 109]. Among them, five studies were undertaken in Tanzania, the  
329 first study estimated an average annual incidence per 100,000 bites of 37.1, 11.3 and 33.5 in  
330 human population district of Ulanga (193280 inhabitants), Kilombero ( 321611 inhabitants) and  
331 Serengeti ( 176057 inhabitants) respectively [95]. The second study found that the incidence of  
332 bite patients seeking PEP declined substantially (>50%) from 2011 to 2015 [96]. The third study

1  
2  
3 333 estimated an annual incidence of ~58 cases per 100,000 [37], the fourth study reported a mean  
4  
5 334 incidence of 74 bites considered at risk of rabies transmission per 100,000 persons per year [103]  
6  
7  
8 335 and the last study conducted in Tanzania revealed an average of 75.6 and 19.3 probable rabies  
9  
10 336 exposures per 100,000 persons per year [105]. Three studies conducted in Ghana reported 54 dog-  
11  
12 337 bite victims bitten by rabies-positive dogs within three years [90], 13 cases of human rabies in a  
13  
14 338 6-year retrospective records review [34] and an annual incidence of rabies cases of 172 per 100,000  
15  
16 339 population [44]. Four studies reported rabies morbidity in Ethiopia. Yizengaw et al. 2018 reported  
17  
18 340 a high incidence rate of rabies exposure during spring (360, 39%) and summer (244, 26.4%)  
19  
20 341 seasons and a total of 924 human rabies exposure cases received the anti-rabies post-exposure  
21  
22 342 prophylaxis from September 2015 to August 2017 [106]. The incidence of human rabies exposure  
23  
24 343 was reported to be 40 per 100,000 population in Ethiopia [29], annual estimated rabies incidence  
25  
26 344 of 2.33 cases per 100,000 in humans [107] and the incidence of human rabies exposure cases  
27  
28 345 calculated per 100,000 populations was 35.8, 63.0, 89.8 and 73.1 in 2012, 2013, 2014 and 2015,  
29  
30 346 respectively [99]. A study conducted in Zimbabwe found among rabies-suspect, 42 (73.7%) were  
31  
32 347 positive [35]. In Madagascar, nine of the 11 suspected human cases tested from 2005 to 2010 with  
33  
34 348 a laboratory confirmed for rabies [92]. In Uganda, a total of 208,720 patients with animal bite  
35  
36 349 injuries were treated at health facilities across the country [94]. Ivory Coast reported 50 cases of  
37  
38 350 human rabies with annual incidence of 0.06–0.08 per 100,000 [31]. Human animal-bite injuries  
39  
40 351 incidence was 289 per 100,000 persons with the highest incidence reported at 302 per 100,000 and  
41  
42 352 lowest at 121 per 100,000 persons in Kenya [29]. Another undertaken in Malawi reported 14  
43  
44 353 paediatric rabies cases during the study period [98]. A six-year retrospective study revealed 31  
45  
46 354 positive cases of human rabies in Madagascar [42]. In Democratic Republic of Congo, a five year  
47  
48  
49  
50  
51  
52  
53  
54 355 retrospective study found 29 positive to rabies in a total of 5,053 dog bites recorded in the  
55  
56  
57  
58  
59

356 veterinary clinics [30] and Frey 2013 estimated an annual incidence of bites from suspected rabid  
 357 animals of 12.9/100 000 and an incidence of 0.7 human rabies deaths/ 100,000 in Chad [109].  
 358 Namibia reported above 16 cases per year from 2011 until 2015 with a maximum of 23 cases  
 359 observed in 2015 with an incidence of 1.0 and 2.4 per 100,000 inhabitants and per year on average  
 360 [39].

361 Table 2: Mapping human rabies morbidity rate

| Country (region, district and town)                                                           | Human rabies morbidity rate                                                                                                                                                                                                                                                                                                                                                | Study duration                                                        |
|-----------------------------------------------------------------------------------------------|----------------------------------------------------------------------------------------------------------------------------------------------------------------------------------------------------------------------------------------------------------------------------------------------------------------------------------------------------------------------------|-----------------------------------------------------------------------|
| Chad (N'Djamena)                                                                              | An annual incidence of bites from suspected rabid animals of 12.9/100 000 [109]                                                                                                                                                                                                                                                                                            | Seven months [109]                                                    |
| Democratic Republic of Congo (Kinshasa)                                                       | 29 positive to rabies in 5,053 dog bites recorded in the veterinary clinics [30].                                                                                                                                                                                                                                                                                          | Five years [30]                                                       |
| Ethiopia (National level; Ababa and outside of Addis Ababa; North Gondar administrative zone) | A total of 924 human rabies reported [107]<br>The incidence of human rabies exposure was reported to be 40 per 100,000 population in Ethiopia [29]<br><br>Annual estimated rabies incidence of 2.33 cases per 100,000 in humans [107]<br><br>The incidence of human rabies exposure cases calculated per 100,000 populations was 35.8, 63.0, 89.8 and 73.1 every year [97] | One year [29]; Two years [106]; three years [97]; Eleven months [107] |
| Ghana (Techiman Municipality; Eastern Region of Ghana)                                        | 54 dog-bite victims bitten by rabies-positive dogs [90]<br><br>13 cases of human [34]<br><br>An annual incidence of rabies cases of 172 per a population of 100,000 [44]                                                                                                                                                                                                   | Three years [90]; Six years [34]; Two years [44]                      |

|                                                                                                                                                                               |                                                                                                                                                                                                                                                                                                                                                                                                                                                         |                                                                          |
|-------------------------------------------------------------------------------------------------------------------------------------------------------------------------------|---------------------------------------------------------------------------------------------------------------------------------------------------------------------------------------------------------------------------------------------------------------------------------------------------------------------------------------------------------------------------------------------------------------------------------------------------------|--------------------------------------------------------------------------|
| Ivory Coast (National level)                                                                                                                                                  | Annual incidence of 0.06–0.08 per 100,000 [31]                                                                                                                                                                                                                                                                                                                                                                                                          | Two years [31]                                                           |
| Kenya (Machakos and Kitui counties in lower eastern region; Kisumu County in Lake Victoria basin; Nandi County in Central rift valley and Kilifi coastal region).             | Human animal-bite injuries incidence of 289 per 100,000 persons [26]                                                                                                                                                                                                                                                                                                                                                                                    | Five years [26]                                                          |
| Madagascar (National level)                                                                                                                                                   | Nine of the 11 suspected human cases tested with a laboratory confirmed for rabies [92].<br><br>31 positive cases of human rabies reported [42].                                                                                                                                                                                                                                                                                                        | Five years [92]; Six years [42]                                          |
| Malawi (Blantyre)                                                                                                                                                             | 14 paediatric rabies cases reported [98].                                                                                                                                                                                                                                                                                                                                                                                                               | Six years [98]                                                           |
| Namibia (Kavango)                                                                                                                                                             | An incidence of 1.0 and 2.4 per 100,000 inhabitants and per year on average [39]                                                                                                                                                                                                                                                                                                                                                                        | Six years [39]                                                           |
| Tanzania (Mwanza region; Tabora; Shinyanga; Mara; Ulanga; Kilombero; Serengeti; Dodoma Region; Ngorongoro districts in northern Tanzania and in the 11 districts in southern) | Average annual incidence per 100,000 bites of 37.1, 11.3 and 33.5 in Human population [95]<br><br>An incidence of bite patients seeking PEP declined substantially (>50%) [96].<br><br>An annual incidence of 58 cases per 100,000 [37]<br><br>Mean incidence of 74 bites considered at risk of rabies transmission per 100,000 persons per year [103].<br><br>An average of 75.6 and 19.3 probable rabies exposures per 100,000 persons per year [105] | Five years [37]; Four years [95-96]; Seven years [103]; Five years [105] |
| Uganda (National level)                                                                                                                                                       | 208,720 patients with animal bite injuries treated at across the country [94].                                                                                                                                                                                                                                                                                                                                                                          | Fourteen years[94]                                                       |

|                           |                                                      |                   |
|---------------------------|------------------------------------------------------|-------------------|
| Zimbabwe (National level) | Among rabies-suspect, 42 (73.7%) were positive [35]. | Eleven years [35] |
|---------------------------|------------------------------------------------------|-------------------|

362

### 363 3.4.2. Rabies mortality

364 Sixteen studies reported rabies related mortality in Africa (Table 3) [16, 27, 33, 36, 38, 40, 41, 91,  
 365 93-95, 104, 105,107-109]. Ethiopia reported three studies among which 320 people, diagnosed  
 366 clinically, died of rabies in a 5-year retrospective study conducted in the national level [16], 386  
 367 human rabies fatality were reported in a 8-year retrospective study with annual range of 35 to 58  
 368 deaths in Addis Ababa and outside of Addis Ababa [41]. There were also 32 cases in human rabies  
 369 recorded from which three humans ended with fatality in North Gondar administrative zone [107].  
 370 Four studies assessed rabies mortality in Tanzania from which Ulanga, Kilombero and Serengeti  
 371 districts reported human rabies mortality rates of 2.4; 0.8 and 1.4/100,000 per year respectively  
 372 [95]. Sixteen human deaths (1,291 victims bite) due to rabies were reported within the Integrated  
 373 Bite Case Management (IBCM) study across 20 districts in 4 regions in Southern, Central, and  
 374 Northern Tanzania [104]. Other studies reported twenty-eight deaths from suspected rabies cases  
 375 during the five-year period in the two districts, an average of 1.5/100,000 per year in Serengeti and  
 376 2.3/100,000 in Ngorongoro [40]. Fourteen (14) among 1005 victim bites died showing clinical  
 377 signs of rabies within 5 years [105]. Three (3) studies identified rabies mortality in Uganda. Among  
 378 them, were 592 (95% CI 345–920) deaths [108], 1 dose of PET was sufficient for protection  
 379 following a rabid animal bite. Another research estimated a total of 371 deaths of rabies with a  
 380 cumulative total of 117,085 rabies cases in nine years [93] and a 14-year retrospective study  
 381 revealed a total of 486 suspected human rabies deaths among 208,720 patients with animal bite  
 382 injuries treated at health facilities across the country [94]. A study undertaken in Moramanga



383 district (Madagascar) recorded an annual incidence of 42–110 rabies exposures and 1–3 deaths per  
 384 100,000 persons [27]. An estimated 7 rabies deaths (95% confidence interval 4–10 deaths) per  
 385 year was recorded in N'Djamena (Chad) [107]. A study conducted in Algeria excluding Sahara  
 386 region found an annual average of 20.6 human rabies deaths [91]. A total of 14 cases of fatal rabies  
 387 with 12 death reported in Maputo City is the capital of Mozambique [33]. An average annualized  
 388 rabies attack rate of 136 rabies cases per 100 000 dog-bite injuries (7/5 139) with 6/7 deaths were  
 389 reported in South Africa [38]. There were patients with furious rabies manifestations and the case-  
 390 fatality rate of 100% in a study conducted in Kinshasa (DRC) [36].

391 Table 3: Mapping human rabies mortality rate

| Country (region, district and town)                                                           | Morbidity rate                                                                                                                                                                        | Study duration                                         |
|-----------------------------------------------------------------------------------------------|---------------------------------------------------------------------------------------------------------------------------------------------------------------------------------------|--------------------------------------------------------|
| Algeria (National level excluding Sahara region)                                              | An annual average of 20.6 human rabies deaths [91]                                                                                                                                    | Thirteen years [91]                                    |
| Chad (N'Djamena)                                                                              | An estimated 7 rabies deaths (95% confidence interval 4–10 deaths) per year [109]                                                                                                     | Seven months [109]                                     |
| Democratic Republic of Congo (Kinshasa)                                                       | Case-fatality rate of 100% [36]                                                                                                                                                       | Eight months [36]                                      |
| Ethiopia (National level, Ababa and outside of Addis Ababa, North Gondar administrative zone) | 320 people died of rabies in a 5-year [16].<br><br>386 humans rabies fatality were reported with annual range of 35 to 58 deaths [41]<br><br>32 cases in human rabies recorded [107]. | Five years [16]; Eight years [41]; Eleven months [107] |
| Madagascar (Moramanga district)                                                               | An annual incidence of 42–110 rabies exposures and 1–3 deaths per 100,000 persons [27]                                                                                                | One year [27]                                          |
| Mozambique (Maputo city)                                                                      | A total of 14 cases of fatal rabies with 12 deaths [33]                                                                                                                               | Three months [33]                                      |
| South Africa (Uthungulu District of Kwazulu-Natal province)                                   | An average annualized rabies attack rate of 136 rabies cases                                                                                                                          | Three years [38]                                       |

|                                                                                                                                                       |                                                                                                                                                                                                                                                                                                                                                                                                                                                           |                                                          |
|-------------------------------------------------------------------------------------------------------------------------------------------------------|-----------------------------------------------------------------------------------------------------------------------------------------------------------------------------------------------------------------------------------------------------------------------------------------------------------------------------------------------------------------------------------------------------------------------------------------------------------|----------------------------------------------------------|
|                                                                                                                                                       | per 100 000 dog-bite injuries (7/5 139) with 6/7 [38]                                                                                                                                                                                                                                                                                                                                                                                                     |                                                          |
| Tanzania (Ulanga, Kilombero and Serengeti districts; 20 districts in 4 regions in Southern, Central, and Northern Tanzania; Serengeti and Ngorongoro) | <p>Human rabies mortality rates of 2.4; 0.8 and 1.4/100,000 per year respectively [95].</p> <p>Sixteen human deaths (1,291 victims bite) due to rabies were reported [105].</p> <p>Twenty-eight deaths from suspected rabies cases during the five-year period in the two districts, an average of 1.5/100,000 per year and 2.3/100,000 [40]</p> <p>Fourteen (14) among 1005 victim bites died showing clinical signs of rabies within 5 years [105].</p> | Five years [40]; Four years [95]; Five years [105]       |
| Uganda (National level; ten district)                                                                                                                 | <p>592 (95% CI 345–920) deaths [108]</p> <p>An estimated a total of 371 deaths of rabies with a cumulative total of 117,085 rabies cases in nine years [93]</p> <p>A total of 486 suspected human rabies deaths among 208,720 patients in fourteen years[94]</p>                                                                                                                                                                                          | Eight years [93]; Fourteen years[94]; Three months [108] |

392

### 393 3.4.3. Rabies disease surveillance, prevention and control

#### 394 3.4.3.1. Rabies prevention and control

395 The review summarized rabies prevention and control in point of view rabies exposure status, PEP,  
 396 dog vaccination and seasonality. Among 36,741 bite victims recorded in studies reporting PEP

1  
2  
3 397 [25, 37, 41, 90, 97, 98, 103], the PEP was initiated based on WHO grade of exposure [112]. We  
4  
5 398 found 505 bites in grade 1 (8.78%), 2050 in grade 2 (35.63%) and 3199 in grade 3 (55.59%) [28,  
6  
7 399 29, 38, 101, 102]. The overall PEP course among bite victims varied between 24% to 99% [25,  
8  
9 400 90]. We reported 2,652 bites victims in studies reporting PEP and mass dog vaccination [29, 34,  
10  
11 401 35, 91, 106]. Dog vaccination coverage varied from 14.1% to 68.78% [29,91]. Other study found  
12  
13 402 that the dog vaccination decreased significantly across the study and also the health status of most  
14  
15 403 dogs involved in biting was unknown [35,106]. Rabies prevention and control also depended on  
16  
17 404 the seasonality. In Ethiopia, two studies reported season wise rabies exposure. The first study  
18  
19 405 reported rabies exposure during spring (360/924, 39%) and summer (244/924, 26.4%) seasons  
20  
21 406 [106]. The second study that found the highest human rabies exposures were reported in spring  
22  
23 407 (April to June) followed by winter (January to March) while the lowest distribution of human  
24  
25 408 rabies exposure was recorded in autumn (October to December) [29]. In Nigeria, Osaghae et al.  
26  
27 409 reported the prevalence of dog bite was highest, 41/81 (50.6%), during the hot season (April– June)  
28  
29 410 and low, 14/81 (17.3%), during the wet season (July–October) [99]. Another study conducted in  
30  
31 411 Nigeria recorded the highest number of dog bites with two peaks in April and October 2008 [43].  
32  
33 412 However, the number of dog bite cases was lowest. For all years the numbers of dog bite cases  
34  
35 413 recorded were lowest at the beginning of the year and dog bites increased during the last 3 months  
36  
37 414 (October-December) of the year 2006 [43]. Animal-to-human rabies transmission was highest  
38  
39 415 during the dry months of July to November in Zimbabwe [35]. In DRC, a study found there was  
40  
41 416 no seasonal difference observed for rabies occurrence either for clinical cases or confirmed cases  
42  
43 417 throughout the study period [30]. In Tanzania, each year, the majority of rabies cases were recorded  
44  
45 418 during the period June to October [37]. In the dry season, significantly fewer rabies positive cases  
46  
47 419 were reported than in the rainy season in Namibia [39]. In Chad, more rabies records per month  
48  
49  
50  
51  
52  
53  
54  
55  
56  
57  
58  
59  
60

1  
2  
3 420 were collected during the hot, dry season months (March and April), than during the dry season  
4  
5 421 months (September–February) [109]. In Senegal, dog bite victims were higher in dry season (Nov-  
6  
7 422 May) than rainy season (June-Oct) [28]. Besides, bite victims in rural areas took longer, on  
8  
9 423 average, to receive PEP than those in urban areas [95,103,106]. Probable human rabies cases were  
10  
11 424 higher in rural than urban areas [29,31]  
12  
13  
14  
15

### 16 425 **3.4.3.2. Rabies surveillance, prevention and control**

17  
18

19 426 The findings revealed that 39,802 bites victims were recorded in rabies surveillance and prevention  
20  
21 427 interventions. The studies included laboratory, database and network surveillances [30, 32, 38, 42,  
22  
23 428 96]. The rabies prevention included PEP and dog vaccination. Laboratory surveillance has  
24  
25 429 improved rabies diagnostic [30, 32, 38, 42, 96] and database and network surveillances improved  
26  
27 430 mortality and morbidity records [32,38,96] and allowed better estimates of the true rabies burden  
28  
29 431 [32] Further, Compliance with PEP regimens was significantly higher, rating from 83.7% to 93%  
30  
31 432 in two studies [38,96]. In contrast, dog vaccination remained low (10%-12.6%) [32, 42].  
32  
33  
34  
35

36 433 We found five studies including rabies diseases surveillance, prevention and control [27, 28, 33,  
37  
38 434 40,104, 105]. Among them, three studies [28, 33, 40] have reported significantly improved rabies  
39  
40 435 morbidity and mortality and also PEP uptake. The PEP uptake was 71% and it dramatically  
41  
42 436 reduced the risk of developing rabies [40]. Another study did not report any death with high  
43  
44 437 number of patients receiving PEP [28].  
45  
46  
47  
48

49 438 A combined strategy of mass dog vaccination, enhanced surveillance, and expanded access to PEP  
50  
51 439 reduced the annual incidence of rabies exposures and deaths annually in Madagascar [27]. Strict  
52  
53 440 measures such as vaccination of dogs in the neighborhoods where human rabies cases had  
54  
55  
56  
57  
58  
59  
60

1  
2  
3 441 occurred, mass vaccination campaign of dogs, participation of private veterinary clinics in animal  
4  
5 442 vaccination, collection of stray dogs in selected neighborhoods and community education  
6  
7 443 regarding prevention and control measures had drastically reduced rabies cases in human to 14  
8  
9 444 during the study period in Mozambique [33].  
10  
11  
12

### 13 445 **3.4.3.3. Post exposure management**

14  
15  
16  
17 446 We found seven studies on rabies management and control. Among them, six studies addressed  
18  
19 447 wound management and PEP [36, 43, 99, 100, 101, 109]. Wound severity was graded as follows,  
20  
21 448 0 = no apparent injury seen, 1 = skin scratch with no bleeding, 2 = minor wound with some  
22  
23 449 bleeding, 3 = deep or multiple injury [101]. The reported severity of the wound was classified as  
24  
25 450 deep wound, lacerated wound, superficial wound or scratch [109]. The severity of the injury was  
26  
27 451 determined using the WHO dog bite injury grading system [112]. Soap, water, wound dressing,  
28  
29 452 tetanus prophylaxis, anti-rabies vaccination, intravenous fluids, diazepam and antibiotics were also  
30  
31 453 part of the management. The overall review reported 5754 bites managed according to the WHO  
32  
33 454 dog bite injury grading system, 3199 (55.59%) were grade 3; 2050 (35.63%) were grade 2; and  
34  
35 455 505 (8.78%) were grade 1. In 52 cases (7%), grade of bite was not recorded [26, 27, 36, 99, 102].  
36  
37  
38  
39  
40

### 41 456 **3.4.4. Available research evidence on human rabies**

42  
43  
44  
45 457 Rabies cases in various committees emphasize the need for active surveillance by following up of  
46  
47 458 people bitten by animals and mass dog vaccinations to alleviate the zoonotic threat of the virus  
48  
49 459 [93]. Strengthening rabies surveillance, controlling rabies in dogs, proper post exposure  
50  
51 460 management, increasing the awareness of the community and ensuring availability of post  
52  
53 461 exposure prophylaxis at lower health facilities are the best approach of eliminating rabies [94, 98,  
54  
55  
56  
57  
58  
59  
60

1  
2  
3 462 107]. Other studies have demonstrated that reinforcements of rabies surveillance system can  
4  
5 463 improve rabies reporting, which ultimately allows for better estimates of the true  
6  
7 464 rabies burden in the countries [31, 32, 38, 96]. Compliance with PEP regimens was significantly  
8  
9 465 higher for patients following the implementation of automated reminders in comparison to patients  
10  
11 466 attending normal clinics [38, 96]. Other studies concluded that preventing dog bites would most  
12  
13 467 effectively reduce bite injuries by improving public health education among children below 15  
14  
15 468 years [38]. Public health education is also enhanced by encouraging early PEP initiation and  
16  
17 469 completion, development and implementation of responsible dog ownership, animal behaviour  
18  
19 470 educational programmes as well as improving human and veterinary health linkages [26, 38].  
20  
21 471 Evidence also showed that no rabies victim in Mozambique received full post-exposure  
22  
23 472 vaccination and the factors significantly associated with human rabies were: age <15 years ( $p =$   
24  
25 473 0.05), bite by stray dog ( $p = 0.002$ ), deep wound ( $p = 0.02$ ), bite in the head ( $p = 0.001$ ), bite by  
26  
27 474 unimmunized dog ( $p = 0.01$ ), no use of soap and water ( $p = 0.001$ ), and no PEP ( $p = 0.01$ ) [35].  
28  
29 475 Studies have shown that all the rabies vaccines including suckling mouse brain virus (SMBV),  
30  
31 476 fetal bovine kidney virus (FBKV), purified chicken embryo cell rabies vaccine, purified vero cell  
32  
33 477 rabies vaccine, sheep brain anti-rabies vaccine, human diploid-cell vaccine and Purified equine  
34  
35 478 rabies immunoglobulin) and RIG were efficacious. However, the WHO contraindicated SMBV  
36  
37 479 and FBKV [25, 27, 28, 32, 41, 42, 108,110, 111]. Furthermore, a clinical trial with a purified  
38  
39 480 chicken embryo cell rabies vaccine dose used intramuscularly every two years generated  
40  
41 481 ineffective immune response to rabies virus [110] as the Zagreb protocol (2 intradermal injections  
42  
43 482 of 0.1 mL at two sites, deltoids and/or thighs, on days 0, 3, 7 and 28) was not applied. Even though  
44  
45 483 a randomized control trial showed antibody response 26.7% of SMBV recipients and 28.6% of  
46  
47 484 FBKV recipients within a week, both SMBV and FBKV were equally efficacious and well  
48  
49  
50  
51  
52  
53  
54  
55  
56  
57  
58  
59

1  
2  
3 485 tolerated [111], however those vaccines are contraindicated by WHO because of its association  
4  
5 486 with neurological adverse reactions (severe allergic encephalomyelitis), further these vaccines are  
6  
7  
8 487 inferior to modern vaccine in terms of potency and immunogenicity [113]. The table 4 described  
9  
10 488 available research evidence on human rabies in Africa.  
11  
12

13  
14 489 Table 4: Mapping human rabies evidence identified in Africa  
15  
16

| Evidence map                                                                                                                                        | Studies                    | Impacts/Outcomes                                                                                                                                                                                                                                       |
|-----------------------------------------------------------------------------------------------------------------------------------------------------|----------------------------|--------------------------------------------------------------------------------------------------------------------------------------------------------------------------------------------------------------------------------------------------------|
| Strengthening rabies surveillance                                                                                                                   | [31,32,38,93,94,96,98,107] | Reinforcements of rabies surveillance system can improve rabies reporting and increasing the awareness of the community and ensuring availability of post exposure prophylaxis at lower health facilities are the best approach of eliminating rabies. |
| Automated SMS reminders and telephone contacts                                                                                                      | [38,40, 96,104,105]        | Compliance with PEP regimens was significantly higher for patients following the implementation of automated SMS reminders and telephone contacts.                                                                                                     |
| Public health education (PEP initiation and completion, responsible dog ownership, behaviour educational programmes and veterinary health linkages) | [26,38,43,94,98,107]       | Lack of enforcement of regulations for licensing of dogs and rabies vaccination increased human rabies morbidity and mortality.                                                                                                                        |
| Accurate rabies diagnostic                                                                                                                          | [27,31,32,34,35,42,92,105] | The diagnosis of dog bite and rabies was clinical and laboratory-based. This improved accurate rabies cases reporting.                                                                                                                                 |
| Mass dog vaccination                                                                                                                                | [35,91,98]                 | Even though the 70% coverage was not achieved, there was an inverse relationship between dog vaccination coverage and dog                                                                                                                              |



|                                                                                                                                                                                                                      |                               |                                                                                                                                              |
|----------------------------------------------------------------------------------------------------------------------------------------------------------------------------------------------------------------------|-------------------------------|----------------------------------------------------------------------------------------------------------------------------------------------|
|                                                                                                                                                                                                                      |                               | rabies cases during the study period.                                                                                                        |
| SMBV, FBKV, purified chicken embryo cell rabies vaccine, purified vero cell rabies vaccine, sheep brain anti- rabies vaccine, human diploid-cell vaccine and Purified equine rabies immunoglobulin (Zagreb protocol) | [ 25,27,28,32,42,108,110,111] | Studies have shown that all the rabies vaccines and RIG were efficacious and well tolerated. However, the WHO contraindicated SMBV and FBKV. |
| Effective rabies control and management                                                                                                                                                                              | [32, 38, 91, 98]              | PEP, mass dog vaccination, and WHO dog bite injury-grading system                                                                            |
| Integrated bites case management/ Rabies Diseases Surveillance, Prevention and Control                                                                                                                               | [27,28, 33,40,104,105]        | Studies have shown the importance of coordinated surveillance, prevention and control in the eradication of rabies.                          |

490

### 491 3.4.5. Adverse events and complications associated with rabies vaccination

492 Adverse events and complications associated with rabies vaccination were reported based on  
 493 SMBV, FBKV, purified chicken embryo cell rabies vaccine, purified vero cell rabies vaccine,  
 494 sheep brain anti- rabies vaccine, human diploid-cell vaccine and purified equine rabies  
 495 immunoglobulin. All the 4-dose or Zagreb regimen was reported in all the RIG [114]. Among the  
 496 studies reporting rabies vaccination, only one study using a purified vero cell rabies vaccine at D0  
 497 (2 doses), D7 (one dose) and D21 (one dose) study found that adverse events occurred in 6% of  
 498 the patients with two doses and after the third dose 3% developed adverse event However, most  
 499 of the adverse events were minor and associated with headache fever and pain at the injection site  
 500 that occurred simultaneously on the same day of the vaccine injection [28]. Other studies did not



1  
2  
3 501 report any adverse events and complications associated with rabies vaccination [25, 27, 32, 41,  
4  
5 502 42,108, 110, 111].  
6  
7

### 8 503 **3.4.6. Research gaps identified**

9  
10  
11 504 In this review, we identified 66.67% African countries reporting poor rabies diagnostic capacity,  
12  
13 505 50 % reported the lack of coordinated surveillance, 50% showed the lack of PEP course  
14  
15 506 completion, 22.22% had insufficient rabies control, and 77.78% had low dog vaccination coverage.  
16  
17 507 Insufficient knowledge and practice on rabies prevention was also identified as a gap. However,  
18  
19 508 we did not find enough studies to evaluate this gap in Africa (Table 5).  
20  
21  
22  
23

24 509 The recorded data available so far has showed the underestimation of rabies diagnosis, post  
25  
26 510 exposure prophylaxis and fatal human cases and could be attributed to poor diagnostic capacity  
27  
28 511 and the absence of national rabies surveillance system. In African countries, rabies diagnostic is  
29  
30 512 mostly clinical [16, 26, 28-30, 33, 36, 38, 39, 41, 44, 93-95, 98-100, 103, 108, 109] Among eleven  
31  
32 513 studies including human rabies surveillance, only four reported adequate and successful  
33  
34 514 surveillances [31,32,38,96], twelve studies reported lack of accurate data or non-existing  
35  
36 515 surveillance data [26,30,33,38,39,42,44,92-94,108,109] (Table 5). Other studies reported that dog-  
37  
38 516 bite victims did not complete the post exposure anti human rabies vaccine course and were not  
39  
40 517 likely to be postexposure prophylaxis [27, 28, 31, 37, 38, 40, 90, 95, 100, 103, 105] (Table 5). The  
41  
42 518 exposure victims considered to be at risk of rabies either did not receive any PEP or did not receive  
43  
44 519 all PEP vaccinations due to unavailability, shortage, cost barriers, insufficient knowledge about  
45  
46 520 prompt PEP, category 1 exposure injury or misadvised [32, 36, 38, 40, 43, 44, 101, 104, 105]. A  
47  
48 521 study has reported that the lack of PEP was the cause of 100% fatality rate in Democratic Republic  
49  
50 522 of Congo [36]. There was significant difference between rural and urban exposure cases in respect  
51  
52 523 to the time of arrival to the hospital and living in rural area was statistically associated with loss to  
53  
54  
55  
56  
57  
58  
59  
60

524 follow up after the first dose [30, 43, 103, 106]. There was also high human rabies exposure rate  
 525 in children and in the rural community [27, 30,103,106]. Insufficient knowledge about rabies  
 526 dangers and prevention, particularly prompt PEP, but also wound management, was the main cause  
 527 of rabies deaths [40]. A higher proportion of human rabies exposures was caused by unprovoked  
 528 dogs and of these, the majority were unvaccinated [29, 43]. Dog vaccination remains an urgent  
 529 intervention gap. Among eighteen studies conducted in nine countries, none of them reported the  
 530 target of 70% of dog vaccination (Table 5). The highest dog vaccination rate was reported in  
 531 Algeria (67.3%) [91] and the lowest in Madagascar (10%) [42].

532 Table 5: Mapping research gaps in Africa

| African countries            | Research gaps identified |                          |                                                |                     |                                                          |                                     |
|------------------------------|--------------------------|--------------------------|------------------------------------------------|---------------------|----------------------------------------------------------|-------------------------------------|
|                              | Diagnostic capacity      | Coordinated surveillance | Lack of PEP course completion /PEP unavailable | Inefficient control | Insufficient knowledge and practice on rabies prevention | Low dog vaccination coverage(<70 %) |
| Algeria                      | N/A                      | N/A                      | N/A                                            | √<br>[91]           | N/A                                                      | X<br>[91]                           |
| Cameroon                     | √<br>[32]                | √<br>[32]                | X<br>[32]                                      | √<br>[32]           | N/A                                                      | X<br>[32]                           |
| Chad                         | X<br>[109]               | X<br>[109]               | X<br>[109]                                     | X<br>[109]          | N/A                                                      | X<br>[109]                          |
| Democratic Republic of Congo | X<br>[30,36]             | X<br>[30]                | X<br>[30,36]                                   | X<br>[30,38]        | N/A                                                      | X<br>[38]                           |
| Ethiopia                     | X<br>[16,29,41]          | N/A                      | X<br>[97]                                      | X<br>[29,97,107]    | X<br>[107]                                               | X<br>[29,97,107]                    |
| Ghana                        | X<br>[44]                | X<br>[44]                | X<br>[44,90]                                   | X<br>[34,44,90]     | N/A                                                      | X<br>[34,90]                        |
| Ivory Coast                  | √                        | √<br>[31]                | X<br>[31]                                      | X<br>[31]           | N/A                                                      | X<br>[31]                           |

|              |                  |                  |                         |                         |           |               |
|--------------|------------------|------------------|-------------------------|-------------------------|-----------|---------------|
|              | [31]             |                  |                         |                         |           |               |
| Kenya        | X<br>[26]        | X<br>[26]        | X<br>[26]               | X<br>[26]               | N/A       | N/A           |
| Madagascar   | √<br>[27,42,92]  | X<br>[42,92]     | X<br>[27,42]            | X<br>[27,42,92]         | N/A       | X<br>[27,42]  |
| Malawi       | X<br>[98]        | √<br>[98]        | √<br>[98]               | √<br>[98]               | N/A       | N/A           |
| Mozambique   | X<br>[33]        | X<br>[33]        | X<br>[33]               | X<br>[33]               | N/A       | X<br>[33]     |
| Namibia      | X<br>[39]        | X<br>[39]        | N/A                     | X<br>[39]               | N/A       | N/A           |
| Nigeria      | X<br>[99,100]    | N/A              | X<br>[43,99-101]        | X<br>[43,99-101]        | N/A       | X<br>[43]     |
| Senegal      | X<br>[28]        | √<br>[28]        | X<br>[28]               | X<br>[28]               | √<br>[28] | X<br>[28]     |
| Tanzania     | X<br>[95,103]    | √<br>[95,103]    | X<br>[37,40,95,103,105] | X<br>[37,40,95,103,105] | X<br>[40] | N/A           |
| Uganda       | X<br>[93,94,108] | X<br>[93,94,108] | X<br>[108]              | X<br>[93,94,108]        | N/A       | X<br>[93,108] |
| South Africa | √<br>[38]        | √<br>[38]        | X<br>[38,102]           | √<br>[38]               | N/A       | N/A           |
| Zimbabwe     | √<br>[35]        | √<br>[35]        | N/A                     | X<br>[35]               | N/A       | X<br>[35]     |

533 Footnote: “X: research gaps identified in different included studies; √: research strengths identified  
 534 in different studies; N/A: Not applicable”

#### 535 4. Discussion

1  
2  
3 536 This is to our knowledge, the first scoping review synthesizing publically available data on rabies  
4  
5 537 in Africa and to weigh such data in support of the global goal of 'zero human rabies deaths by  
6  
7 538 2030'. The purpose of this scoping analysis was to provide a summary of evidence on rabies  
8  
9 539 morbidity, mortality, integrated rabies surveillance, prevention and control in Africa. Overall,  
10  
11 540 studies have shown that African countries face a range of problems from the point of view of rabies  
12  
13 541 surveillance, prevention and control that have a negative effect on rabies mortality and morbidity.  
14  
15 542 Reviewing rabies morbidity and mortality rates across Africa, data obtained fluctuated largely over  
16  
17 543 time and space in various countries, as well as in different regions or districts across the same area.  
18  
19 544 While some countries may have shown significant improvement in rabies morbidity and mortality  
20  
21 545 data, the morbidity and mortality rates in Africa generally remain high. Included studies showed  
22  
23 546 no standardization in reporting human rabies outcomes, human rabies morbidity and mortality  
24  
25 547 rates were reported in term of annual incidence and number of infected human rabies and deaths  
26  
27 548 related to rabies. Moreover, small-scale studies may not reflect the national or regional human  
28  
29 549 rabies morbidity and mortality rates. Then this was difficult to have an accurate picture per country  
30  
31 550 and assess human rabies situation between African countries.  
32  
33  
34  
35  
36  
37  
38

39 551 These are the consequences of lack of laboratory rabies confirmation, epidemiological  
40  
41 552 surveillance, inadequate mass dog vaccination and PEP policy, and unreported clinical cases in  
42  
43 553 African countries. Lack of monitoring data on rabies or low data quality is problematic, resulting  
44  
45 554 in rabies being poorly addressed in most African countries. Results have also shown that, of the  
46  
47 555 eleven countries in which rabies surveillance has been applied, only four studies reported that  
48  
49 556 surveillance decreased rabies morbidity and mortality [31, 32, 38, 96]. Comparing old and new  
50  
51 557 data (before and after the “zero rabies by 2030” target), rabies diagnostic and surveillance has not  
52  
53 558 improved in most of the African countries. As a result, well-structured rabies surveillance  
54  
55  
56  
57  
58  
59  
60

1  
2  
3 559 enhanced the reporting of morbidity and mortality and also has a visible impact on rabies  
4  
5 560 elimination strategy in Africa. While strategies have been subdivided into surveillance, prevention,  
6  
7 561 control and management of rabies (see table of included studies), only three studies have shown  
8  
9 562 the efficacy of the combination of surveillance, prevention and control of rabies [28, 33, 40].  
10  
11 563 However, passive surveillance has shown its limitations in rabies elimination because cases are  
12  
13 564 reported clinically with or without laboratory-based strategies, inducing inaccurate diagnostic,  
14  
15 565 scarcity of laboratory confirmation and poor reporting system [26, 39, 42, 93, 94, 108]. This is  
16  
17 566 why both passive and active surveillance are preferable to strengthen rabies monitoring and  
18  
19 567 reporting in African countries [115]. Strengthening rabies surveillance also is the foundation of  
20  
21 568 the provision of actionable data for efficient management of wildlife diseases [116]. Besides, the  
22  
23 569 review has shown that strengthening surveillance, prevention and management of rabies has shown  
24  
25 570 good evidence in three separate studies [28, 33, 40]. Coordination of surveillance, prevention and  
26  
27 571 control of rabies can play an important role in the eradication of rabies in Africa. It is worth noting  
28  
29 572 that specific awareness of when and where disease occurs is essential to the formulation of  
30  
31 573 prevention, control and elimination strategies [116].  
32  
33  
34  
35  
36  
37  
38

39 574 As seen above, the implementation of different rabies interventions at national level has never been  
40  
41 575 reached in African countries. It is vital that African countries achieve the 2030 target of eliminating  
42  
43 576 human rabies by providing readily accessible and affordable PEP in all countries in the continent  
44  
45 577 where rabies infection is endemic. The exposure victims considered to be at risk of rabies either  
46  
47 578 did not receive any PEP or did not receive complete PEP vaccinations due to unavailability,  
48  
49 579 shortage, cost barriers, insufficient knowledge about prompt PEP or misadvice  
50  
51 580 [32,36,40,44,101,104,105]. This could be emulated from Thailand, which has significantly  
52  
53 581 reduced human deaths from rabies to fewer than 10 cases per year by educating the public and  
54  
55  
56  
57  
58  
59  
60

1  
2  
3 582 health workers and delivering PEP free of charge across the country before mass dog vaccination  
4  
5 583 achieved the minimum 70 per cent coverage [117,118]. When provided correctly and in a timely  
6  
7 584 manner, rabies PEP is almost 100% effective in the prevention of disease [79,119]. The findings  
8  
9  
10 585 of the review revealed that the dog victims found to be at risk of rabies either did not receive PEP  
11  
12 586 or did not receive all the PEP vaccines due to unavailability, shortages, cost barriers, long distance  
13  
14 587 travel to the hospital or misadvice [27,28,31,32,36,37,40,44,90,95,100,101,103-105]. It is  
15  
16 588 important to remember that PEP combined with other treatments such as soap, water, wound  
17  
18 589 dressing, antibiotics, tetanus prophylaxis and anti-rabies vaccination has been shown to be  
19  
20 590 beneficial for dog bite victims. Two studies have shown that compliance with PEP regimens was  
21  
22 591 substantially higher for patients who did not receive PEP after automated reminders [38, 96].  
23  
24 592 Taken together, our results point to a sub-optimal system requiring specific improvements to  
25  
26 593 achieve prompt provision of rabies PEP for persons exposed to rabies [118].  
27  
28  
29  
30  
31

32 594 Statistical modeling studies show that the annual vaccination of 70% of the canine population  
33  
34 595 would induce adequate herd immunity to effectively eradicate canine rabies and subsequent human  
35  
36 596 exposure [40, 51]. The lowest and highest reviewed dog vaccination rate was 10% and 67.3%  
37  
38 597 respectively [42, 51] and no reliable data on dog vaccination were reported in most of the studies.  
39  
40 598 This is because many campaigns, if conducted, struggle to achieve a 70% vaccination rate [9, 51].  
41  
42 599 This is due to husbandry practices, rabies knowledge, geographical area/location, and the ages of  
43  
44 600 dogs [120]. Evidence has shown the dog mass vaccination systems have demonstrated some  
45  
46 601 effectiveness in reducing human rabies morbidity and mortality in countries such as KwaZulu-  
47  
48 602 Natal, South Africa [55, 71], Serengeti, Tanzania [55, 72, 74], Malawi [55, 75] and Chad [76, 77].  
49  
50 603 However, the Tanzanian study has shown that, if vaccine coverage was not sustained, rabies  
51  
52 604 infection would resurface extremely quickly [40]. Despite effective monitoring of rabies at the  
53  
54  
55  
56  
57  
58  
59  
60

1  
2  
3 605 Tanzania study site from 1998 to 2001, vaccine coverage decreased from 2001 to 2003 resulting  
4  
5 606 in a new rabies outbreak, with human exposures increasing by six times in 2003 relative to previous  
6  
7  
8 607 years [40]. Further, free mass dog vaccination intervention has proven to increase dog vaccination  
9  
10 608 coverage. Government and stakeholders work actively to provide a free sustainable dog  
11  
12 609 vaccination.

13  
14  
15  
16 610 Besides, the evidence has also illustrated the effectiveness of other strategies, such as mobile phone  
17  
18 611 touch tracing strategies, new rabies vaccines, integrated bite case management, wound  
19  
20 612 management were correlated with PEP and/or mass dog vaccination. Africa is yet to recognize  
21  
22 613 rabies as an immediate public health problem; this may be due to a lack of awareness of the burden  
23  
24 614 of disease and inadequate surveillance. Policies should be put in place to raise awareness of rabies  
25  
26 615 at grassroots level and coordination between the appropriate agencies for improvements of the  
27  
28 616 policies [53, 60].

29  
30  
31  
32  
33 617 The World Animal Health Information System (WAHIS) is a well-established global animal  
34  
35 618 disease reporting system that reproduces the data submitted by countries to the OIE, but is also  
36  
37 619 constrained by the under-reporting problems inherent in national reporting systems [121,122]. The  
38  
39 620 need for regional, One Health-oriented reporting network has therefore become apparent  
40  
41 621 [123,124]. The development of rabies-specific regional bulletins has been extremely effective in  
42  
43 622 the Pan-American Health Organization field [122]. The Database such as Advanced  
44  
45 623 Epidemiological Surveillance System (SIEPI) should be applicable in Africa.

46  
47  
48  
49  
50 624 Indeed, the elimination of rabies is not feasible without African cooperation. No single country  
51  
52 625 will retain rabies-free status unless it is brought under control in neighboring countries [124].  
53  
54 626 Regionally organized efforts are required to eradicate human rabies, taking into account country-

1  
2  
3 627 specific needs and socio-cultural acceptability [124]. This study has highlighted evidence required  
4  
5 628 for rabies surveillance, prevention and control in Africa. The literature has shown that such  
6  
7 629 evidence has eliminated dog-mediated rabies in countries such as Singapore and Malaysia [124].  
8  
9 630 The probability of meeting the 2030 goal without African and international solidarity is low, as  
10  
11 631 more than two-thirds of countries are in the low-level human development community [125].  
12  
13 632 Leading countries should serve as role models, sharing their knowledge and skills so that no nation  
14  
15 633 is left behind. African unification with international support will enable, the common goal of zero  
16  
17 634 human rabies deaths to be achieved by 2030 [125]. Therefore, regional networks support, channel  
18  
19 635 and pool efforts, support monitoring platforms will help make much progress [126]. Partnerships  
20  
21 636 are important to the achievement of an objective and the last mile is going to be the most  
22  
23 637 demanding [126]. In addition, contact and collaboration between human health and veterinary  
24  
25 638 systems is also critical for the follow-up of both human and animal cases [127]. Data collected on  
26  
27 639 alleged cases of human rabies, human exposures and rabid animals must be constantly reviewed  
28  
29 640 and effectively disseminated [127]. Communication between the various national levels of  
30  
31 641 healthcare administration is a crucial means of disseminating outcomes [127]. Finally,  
32  
33 642 stakeholders need to be engaged in the long term to ensure that surveillance is effective [127].  
34  
35 643 Knowing that the Global Strategic Plan is catalytic and not intended to replace the strategies and  
36  
37 644 commitments of individual countries [126], African countries should emphasize gaps, challenges,  
38  
39 645 barriers and evidence applicable in the various districts, countries and regions as indicated in this  
40  
41 646 present study. One Health interventions is provided by approaches to the prevention of human  
42  
43 647 rabies deaths [128]. Human rabies is 100% preventable through two complementary measures:  
44  
45 648 first, PEP, which involves administration of rabies immunoglobulin and a multi-dose course of  
46  
47 649 rabies vaccination to people bitten by suspected rabid animals; second, mass vaccination of animal  
48  
49  
50  
51  
52  
53  
54  
55  
56  
57  
58  
59



1  
2  
3 650 reservoirs (primarily domestic dogs, the reservoir in the vast majority of human cases), which  
4  
5 651 reduces the risk of human exposure and can ultimately result in rabies virus elimination [128].  
6  
7

8  
9 652 New rabies control tests and technologies have been developed, such as oral rabies vaccine (ORV),  
10  
11 653 which is effective for instance in skunks, red foxes and raccoons, and lessons have been learned  
12  
13 654 from recent outbreaks [129]. Oral recombinant vaccinia virus expressing the immunizing rabies  
14  
15 655 glycoprotein has been used in in Switzerland years ago [130]. It has been demonstrated to be  
16  
17 656 effective for the oral immunization of foxes, some of them being competitors for long baits year  
18  
19 657 consumption. Switzerland eradicated wild rabies since 1985 [127] V-RG is effective at inducing  
20  
21 658 immunity in red foxes through intradermal, subcutaneous and oral routes [131,132]. Adult foxes  
22  
23 659 were completely covered against rabies virus challenge 12 and 18 months after oral administration  
24  
25 660 of Glycoprotein Recombinant Virus (V-RG) [133]. Seroconversion was also observed in 44.4% of  
26  
27 661 vaccinated jackals on day 150 post-vaccination and 77.7% vaccinated jackals survived the rabies  
28  
29 662 challenge that killed all 10 controls [132,133]. A single oral dose of V-RG administered in an  
30  
31 663 experimental sponge bait shape protected raccoons from rabies virus challenge, with 100%  
32  
33 664 survival at 28 days post-vaccination and 80% survival at 205 days [132,134]. Since 2004, ORV  
34  
35 665 campaigns have been conducted annually around Israel. After several years of ORV, the vast  
36  
37 666 majority of Israel (90%) is actually free of carnivorous rabies virus variants. Wildlife rabies is  
38  
39 667 managed in Canada in the same way as in the USA by reservoir population management and ORV  
40  
41 668 distribution [132,135].  
42  
43  
44  
45  
46  
47  
48

49 669 These were associated with a less robust and inadequate supply system for rabies biologicals  
50  
51 670 operated separately to that used by routine vaccines and the use of the intramuscular route for PEP  
52  
53  
54  
55  
56  
57  
58  
59  
60

1  
2  
3 671 administration as opposed to the dose-saving intradermal route with high cost of rabies PEP and  
4  
5 672 rabies immunoglobulin (RIG) to bite patients [118].  
6  
7

## 9 673 **5. Conclusion**

10  
11  
12 674 This comprehensive scoping review is of crucial importance in assessing various evidence of  
13  
14 675 human rabies morbidity, mortality, monitoring, prevention and management. Rabies control  
15  
16 676 strategies and case effects, available studies establishment to address various gaps are also  
17  
18 677 important in the management of rabies in Africa. The analysis included past, existing and future  
19  
20 678 viewpoints that are important for African countries to achieve zero dog-transmitted human rabies  
21  
22 679 by 2030. The findings of forty-three studies included thirty-two quantitative retrospective studies,  
23  
24 680 three mixed designs (retrospective and cross-sectional studies), three prospective cohort studies,  
25  
26 681 two cross-sectional studies, one case control, one clinical trial and one randomized control study.  
27  
28 682 Mapping the outcomes, the review included rabies morbidity (21 studies), mortality (15 studies),  
29  
30 683 rabies prevention and control (16 studies), surveillance (9 studies), surveillance and prevention (5  
31  
32 684 studies), management and control (7 studies), surveillance, prevention and control (6 studies),  
33  
34 685 strong research evidence (14 studies), rabies vaccination or PEP adverse events (4 studies) and  
35  
36 686 research gaps were identified (41 studies).  
37  
38  
39  
40  
41  
42

43 687 Evidence has shown that human rabies morbidity and mortality remain high compared to rabies  
44  
45 688 globally, and human rabies morbidity and mortality fluctuate in time and space across different  
46  
47 689 African countries. In order to better understand this, the review has shown that monitoring,  
48  
49 690 prevention and control of rabies diseases is inadequate and insufficient in most African countries.  
50  
51 691 This is attributable to a variety of gaps and challenges across African countries. In addition, this  
52  
53 692 study found insufficient and ineffective surveillance of rabies, unavailability of PEP, high cost,  
54  
55  
56  
57  
58  
59  
60

1  
2  
3 693 lack of information on prevention of rabies, and poor or non-existent data on dog vaccination.  
4  
5 694 However, few studies have shown a thorough design of rabies measures such as enhanced  
6  
7 695 surveillance of rabies, regulation of rabies in dogs, proper post-exposure treatment, improved  
8  
9 696 community awareness and availability of PEP in all rural areas, use of cell phone intervention to  
10  
11 697 enhance surveillance of rabies, prevention and control of enhanced rabies morbidity, and more. In  
12  
13 698 addition, African countries can learn about different community-based obstacles that can interfere  
14  
15 699 with surveillance, prevention and control of rabies diseases. This is important to point out that no  
16  
17 700 single country will preserve rabies-free status unless it is brought under control in neighboring  
18  
19 701 countries [120]. That is why African countries should build a forum for rabies that may be  
20  
21 702 significant to exchange data and experience on rabies. Finally, African countries can also look at  
22  
23 703 futuristic rabies innovations such as ORV.  
24  
25  
26  
27  
28  
29

## 30 704 **6. Patients and public involvement**

31  
32 705 No patients or the public were involved in this scoping review.  
33  
34

## 35 706 **7. List of abbreviations**

36  
37  
38  
39 707 FBKV: Fetal Bovine Kidney Virus; FAO: Food and Agriculture Organization of the United  
40  
41 708 Nations; GARC: Global Alliance for Rabies Control; JBI: Joanna Briggs Institute; OIE: World  
42  
43 709 Organization for Animal Health; ORV: Oral Rabies Vaccine; PEP: Post-Exposure Prophylaxis;  
44  
45 710 PICO: Population-Interventions-Comparisons-Outcomes; PRISMA: Preferred Reporting Items  
46  
47 711 for Systematic Reviews and Meta-Analysis; RABV: Rabies virus; RIG: Rabies Immunoglobulin;  
48  
49 712 SMBV: Suckling Mouse Brain Virus; SIEPI: Specialized Epidemiological Surveillance System;  
50  
51 713 WAHIS: World Animal Health Information System; V-RG: Vaccinia-rabies Glycoprotein  
52  
53 714 Recombinant Virus; WHO: World Health Organization;  
54  
55  
56  
57  
58  
59  
60

1  
2  
3 715 **8. Footnotes**  
4  
5

6  
7 716 **Author Contributions:** PSN initiated the study project. PSN and JLT conducted the data  
8  
9 717 extraction. Both authors wrote the review in consultation with JW, RT, AM, SVN, TB, JLT, LN,  
10  
11 718 NEN, GKH, MTG, AA, SD, LB, RB and CD. All the authors reviewed and approved the final  
12  
13 719 version of the manuscript.  
14  
15

16  
17 720 **Funding:** None  
18  
19

20 721 **Competing interests:** None declared  
21  
22

23  
24 722 **Ethics Approval:** Since this is a scoping review, there is no institutional requirement to obtain  
25  
26 723 ethical clearance from the Health Research Ethics Committee of the Faculty of Medicine and  
27  
28 724 Health Sciences, Stellenbosch University. We used data from open source and publicly available  
29  
30 725 accessed on different databases as described in the methods.  
31  
32

33  
34 726 **Data sharing:** Not applicable  
35  
36

37  
38 727 **Consent for publication:** All authors review the manuscript and approved for the submission.  
39  
40

41 728 **Acknowledgments:** Not applicable  
42  
43

44  
45 729 **9. References**  
46

47 730 1. Nel LH. Discrepancies in data reporting for rabies, Africa. Emerging infectious diseases  
48  
49 731 2013;19(4):529.  
50  
51  
52  
53  
54  
55  
56  
57  
58  
59  
60

- 1  
2  
3 732 2. albi C, Holmes EC, De Benedictis P, Faye O, Nakoune E, Gamatie D, Diarra A, Elmamy  
4  
5 733 BO, Sow A, Adjogoua EV and Sangare O. Evolutionary history and dynamics of dog rabies virus  
6  
7 734 in western and central Africa. *Journal of general virology* 2009; 90(4):783-791.  
8  
9  
10  
11 735 3. Nel LH, Rupprecht CE. Emergence of lyssaviruses in the Old World: the case of Africa.  
12  
13 736 In: *Wildlife and Emerging Zoonotic Diseases: The Biology, Circumstances and Consequences of*  
14  
15 737 *Cross-Species Transmission*. Springer 2007; 315:161-93.  
16  
17  
18  
19 738 4. Nel LH. Factors impacting the control of rabies. *one Health: people, Animals, and the*  
20  
21 739 *Environment* 2014. <https://doi.org/10.1128/9781555818432.ch7>  
22  
23  
24  
25 740 5. Eze UU, Ngoepe EC, Anene BM, Ezeokonkwo RC, Nwosuh CI, Sabeta CT. Molecular  
26  
27 741 Detection of Rabies Lyssaviruses from Dogs in Southeastern Nigeria: Evidence of Trans boundary  
28  
29 742 Transmission of Rabies in West Africa. *Viruses* 2020; 12(2):134.  
30  
31  
32  
33 743 6. David D, Hughes GJ, Yakobson BA, Davidson I, Un H, Aylan O, et al. Identification of  
34  
35 744 novel canine rabies virus clades in the Middle East and North Africa. *Journal of General Virology*  
36  
37 745 2007; 88(3):967-80.  
38  
39  
40  
41 746 7. Kissi B, Tordo N and Bourhy H. Genetic polymorphism in the rabies virus nucleoprotein  
42  
43 747 gene. *Virology* 1995; 209(2): 526-537.  
44  
45  
46  
47 748 8. Swanepoel R, Barnard BJH, Meredith CD, Bishop G, Bruckner GK, Foggin CM, et al.  
48  
49 749 Rabies in southern Africa. *Onderstepoort Journal of Veterinary Research* 1993; 60:325.  
50  
51  
52  
53 750 9. Cleaveland S. Epidemiology and control of rabies: The growing problem of rabies in  
54  
55 751 Africa. *Transactions of the Royal Society of Tropical Medicine and Hygiene* 1998; 92(2):131-4.  
56  
57  
58  
59  
60

- 1  
2  
3 752 10. Knobel D and Conan A. Dog Ecology and Rabies Control in Africa World Small Animal  
4  
5 753 Veterinary Association World Congress Proceedings. Age 2014; 4(9): 23.  
6  
7  
8  
9 754 11. Röttcher D and Sawchuk AM. Wildlife rabies in Zambia. Journal of wildlife diseases 1978;  
10  
11 755 14(4): 513-517.  
12  
13  
14  
15 756 12. Botros BAM, Salib AW, Mellick PW, Linn JM, Soliman AK, Scott RM. Antigenic  
16  
17 757 variation of wild and vaccine rabies strains of Egypt. Journal of medical virology 1988; 24(2):153-  
18  
19 758 9.  
20  
21  
22  
23 759 13. Burrows R. Rabies in African wild dogs of Tanzania. Journal of wildlife diseases 1994;  
24  
25 760 30(2):297-9.  
26  
27  
28  
29 761 14. Kat PW, Alexander KA, Smith JS, Munson L. Rabies and African wild dogs in Kenya.  
30  
31 762 Series B: Biological Sciences 1995; 262(1364):229-33.  
32  
33  
34 763 15. Foggin CM. The epidemiological significance of jackal rabies in Zimbabwe. In: Rabies in  
35  
36 764 the Tropics. Springer, 1985:399-405.  
37  
38  
39  
40 765 16. Tefera G, Yimer E and Geyid A. Endemic existence of rabies in Ethiopia. Ethiopian  
41  
42 766 Medical Journal 2002; 40(2): 163-10.  
43  
44  
45  
46 767 17. Nel LH, Sabeta CT, Von Teichman B, Jaftha JB, Rupprecht CE and Bingham J. Mongoose  
47  
48 768 rabies in southern Africa: a re-evaluation based on molecular epidemiology. Virus research 2005,  
49  
50 769 109(2):165-173.  
51  
52  
53  
54  
55  
56  
57  
58  
59  
60

- 1  
2  
3 770 18. Woodroffe R, Prager KC, Munson L, Conrad PA, Dubovi EJ, Mazet JAK. Contact with  
4  
5 771 domestic dogs increases pathogen exposure in endangered African wild dogs (*Lycaon pictus*). *PloS*  
6  
7 772 *one* 2012; 7(1): e30099.  
9  
10  
11 773 19. Scheepers JL, Venzke KAE. Attempts to reintroduce African wild dogs *Lycaon pictus* into  
12  
13 774 Etosha National Park, Namibia. *South African Journal of Wildlife Research-24-month delayed*  
14  
15 775 *open access* 1995; 25(4):138-40.  
17  
18  
19 776 20. Kat PW, Alexander KA, Smith JS, Munson L. Rabies and African wild dogs in Kenya.  
20  
21 777 *Proceedings of the Royal Society of London. Series B: Biological Sciences* 1995; 262(1364):229-  
22  
23 778 33.  
24  
25  
26  
27 779 21. Sabeta C, Ngoepe EC. Controlling dog rabies in Africa: successes, failures and prospects  
28  
29 780 for the future. *Revue scientifique et technique (International Office of Epizootics)* 2018;  
30  
31 781 37(2):439-49.  
32  
33  
34  
35 782 22. Johnson N, Mansfield KL, Marston DA, Wilson C. et al. A new outbreak of rabies in rare  
36  
37 783 Ethiopian wolves (*Canis simensis*). *Archives of virology* 2010, 155(7): 1175-1177.  
38  
39  
40  
41 784 23. Marino J, Sillero-Zubiri C, Deressa A Et al. Rabies and distemper outbreaks in smallest  
42  
43 785 Ethiopian wolf population. *Emerging infectious diseases* 2017, 23(12): 2102.  
44  
45  
46  
47 786 24. Tomori Oyewale. Wild life rabies in Nigeria: experimental infection and transmission  
48  
49 787 studies with the shrew (*Crocidura* sp.). *Annals of Tropical Medicine & Parasitology* 1980;  
50  
51 788 74(2):151-6.  
52  
53  
54  
55  
56  
57  
58  
59  
60

- 1  
2  
3 789 25. Ramos J, Melendez N, Reyes F, Gudiso G, Biru D, Fano G, et al. Epidemiology of animal  
4  
5 790 bites and other potential rabies exposures and anti-rabies vaccine utilization in a rural area in  
6  
7 791 Southern Ethiopia. *Annals of agricultural and environmental medicine* 2015; 22(1):76-79.  
8  
9  
10  
11 792 26. Ngugi JN, Maza AK, Omolo OJ, Obonyo M. Epidemiology and surveillance of human  
12  
13 793 animal-bite injuries and rabies post-exposure prophylaxis, in selected counties in Kenya, 2011-  
14  
15 794 2016. *BMC public health* 2018; 18(1):996.  
16  
17  
18  
19 795 27. Rajeev M, Edosoa G, Hanitriniaina C, Andriamandimby SF, Guis H, Ramiandrasoa R, et  
20  
21 796 al. Healthcare utilization, provisioning of post-exposure prophylaxis, and estimation of human  
22  
23 797 rabies burden in Madagascar. *Vaccines* 2019; 37:A35-44.  
24  
25  
26  
27 798 28. Diallo MK, Dicko A, Richard V, Espie E. Human rabies post exposure prophylaxis at the  
28  
29 799 Pasteur Institute of Dakar, Senegal: trends and risk factors. *BMC Infectious Diseases* 2019;  
30  
31 800 19(1):321.  
32  
33  
34  
35 801 29. Gebru G, Romha G, Asefa A, Hadush H, Biedemariam M. Risk Factors and Spatio-  
36  
37 802 Temporal Patterns of Human Rabies Exposure in Northwestern Tigray, Ethiopia. *Annals of global*  
38  
39 803 *health* 2019; 85(1):119.  
40  
41  
42  
43 804 30. Twabela AT, Mweene AS, Masumu JM, Muma JB, Lombe BP, Hankanga C. Overview of  
44  
45 805 animal rabies in Kinshasa Province in the Democratic Republic of Congo. *Plos one* 2016;  
46  
47 806 11(4):e0150403.  
48  
49  
50  
51  
52  
53  
54  
55  
56  
57  
58  
59  
60



- 1  
2  
3 807 31. Tiembre I, Broban A, Benie J, Tetchi M, Druelles S, L'Azou M. Human rabies in Cote  
4  
5 808 d'Ivoire 2014-2016: Results following reinforcements to rabies surveillance. PLoS neglected  
6  
7 809 tropical diseases 2018; 12(9): e0006649.  
8  
9  
10  
11 810 32. Sofeu CL, Broban A, Njifou NA, Blaise MJ, Sadeuh-Mba S A, Druelles S, et al. Improving  
12  
13 811 systematic rabies surveillance in Cameroon: A pilot initiative and results for 2014-2016. Plos  
14  
15 812 neglected tropical diseases 2018; 12(9):e0006597.  
16  
17  
18  
19 813 33. Salomão C, Nacima A, Cuamba L, Gujral L, Amiel O, Baltazar C, et al. Epidemiology,  
20  
21 814 clinical features and risk factors for human rabies and animal bites during an outbreak of rabies in  
22  
23 815 Maputo and Matola cities, Mozambique, 2014: Implications for public health interventions for  
24  
25 816 rabies control. Plos neglected tropical diseases 2017; 11(7):e0005787.  
26  
27  
28  
29  
30 817 34. Punguyire DT, Osei-Tutu A, Aleser EV, Letsa T. Level and pattern of human rabies and  
31  
32 818 dog bites in Techiman Municipality in the Middle Belt of Ghana: a six year retrospective records  
33  
34 819 review. Pan African Medical Journal 2017. Doi: 10.11604/pamj.2017.28.281.14218  
35  
36  
37  
38 820 35. Pfukenyi DM, Pawandiwa D, Makaya PV, Ushewokunze-Obatolu U. A retrospective study  
39  
40 821 of wildlife rabies in Zimbabwe, between 1992 and 2003. Tropical Animal Health and Production  
41  
42 822 2009; 41(4):565-72.  
43  
44  
45  
46 823 36. Muyila DI, Aloni MN, Lose-Ekanga MJ, Nzita JM, Kalala-Mbikay A, Bongo HL, et al.  
47  
48 824 Human rabies: a descriptive observation of 21 children in Kinshasa, the Democratic Republic of  
49  
50 825 Congo. Pathogens and global health 2014; 108(7):317-22.  
51  
52  
53  
54  
55  
56  
57  
58  
59  
60

- 1  
2  
3 826 37. Mazigo HD, Okumu FO, Kweka EJ, Mnyone LL. Retrospective analysis of suspected  
4  
5 827 rabies cases reported at Bugando Referral Hospital, Mwanza, Tanzania. *Journal of global*  
6  
7 828 *infectious diseases* 2010; 2(3):216.  
9  
10  
11 829 38. Kubheka V, Govender P, Margot B, Kuonza LR. Dog bites and human rabies in the  
12  
13 830 Uthungulu District of Kwazulu-Natal province, 2008-2010: a review of surveillance data. *Southern*  
14  
15 831 *African Journal of Epidemiology and Infection* 2013; 28(1):33-40.  
17  
18  
19 832 39. Hikufe EH, Freuling CM, Athingo R, Shilongo A, Ndevaetela EE, Helao M, et al. Ecology  
20  
21 833 and epidemiology of rabies in humans, domestic animals and wildlife in Namibia, 2011-2017. *Plos*  
22  
23 834 *neglected tropical diseases* 2019; 13(4):e0007355.  
25  
26  
27 835 40. Hampson K, Dobson A, Kaare M, Dushoff J, Magoto M, Sindoya E, et al. Rabies  
28  
29 836 exposures, post-exposure prophylaxis and deaths in a region of endemic canine rabies. *PloS Negl*  
30  
31 837 *Trop Dis* 2008; 2(11):e339.  
33  
34  
35 838 41. Deressa A, Ali A, Bayene M, Selassie BN, Yimer E, Hussen K. The status of rabies in  
36  
37 839 Ethiopia: A retrospective record review. *Ethiopian Journal of Health Development* 2010;  
38  
39 840 24(2):127-132.  
41  
42  
43 841 42. Andriamandimby SF, Heraud Jean-Michel, Ramiandrasoa R, Ratsitorahina M,  
44  
45 842 Rasambainarivo JH, Dacheux L, et al. Surveillance and control of rabies in La Reunion, Mayotte,  
46  
47 843 and Madagascar. *Veterinary Research* 2013; 44(1):1-9.  
48  
49  
50  
51  
52  
53  
54  
55  
56  
57  
58  
59  
60

- 1  
2  
3 844 43. Alabi O, Nguku P, Chukwukere S, Gaddo A, Nsubuga P, Umoh J. Profile of dog bite  
4  
5 845 victims in Jos Plateau State, Nigeria: a review of dog bite records (2006-2008). *The Pan African*  
6  
7 846 *medical journal* 2014; 18(Suppl 1):12.
- 8  
9  
10  
11 847 44. Adomako BY, Baiden F, Sackey S, Ameme DK, Wurapa F, Nyarko KM, et al. Dog bites  
12  
13 848 and rabies in the eastern region of Ghana in 2013-2015: a call for a one-health approach. *Journal*  
14  
15 849 *of tropical medicine* 2018; 2018:5 pages
- 16  
17  
18  
19 850 45. Hampson K, Coudeville L, Lembo T, Sambo M, Kieffer A, Attlan M, et al. Estimating the  
20  
21 851 global burden of endemic canine rabies. *PloS Negl Trop Dis* 2015; 9(4):e0003709.
- 22  
23  
24  
25 852 46. Desa G, Birasa D, Deneke Y, Oljira D. Assessment of knowledge, attitude and practice  
26  
27 853 (kap) of community toward rabies in Medawelabu district, bale zone, Ethiopia. *International*  
28  
29 854 *Journal of Research-Granthaalayah* 2020; 8(3):29-42.
- 30  
31  
32  
33 855 47. Cleaveland S, Lankester F, Townsend S, Lembo T, Hampson K. Rabies control and  
34  
35 856 elimination: a test case for One Health. *Veterinary Record* 2014; 175(8):188-93.
- 36  
37  
38  
39 857 48. World Health Organization. Rabies: rationale for investing in the global elimination of  
40  
41 858 dog-mediated human rabies. World Health Organization, 2015.  
42  
43 859 <https://apps.who.int/iris/handle/10665/185195>
- 44  
45  
46  
47 860 49. Fooks AR, Banyard AC, Horton DL, Johnson N, McElhinney LM, Jackson AC. Current  
48  
49 861 status of rabies and prospects for elimination. *The lancet* 2014; 384(9951):1389-99.
- 50  
51  
52  
53  
54  
55  
56  
57  
58  
59  
60

- 1  
2  
3 862 50. Knobel DL, Cleaveland S, Coleman PG, Fevre EM, Meltzer MI, Miranda MEG, et al. Re-  
4  
5 863 evaluating the burden of rabies in Africa and Asia. *Bulletin of the World Health Organization*  
6  
7 864 2005; 83:360-8.  
8  
9  
10  
11 865 51. Lavan RP, King AIM, Sutton DJ, Tunceli K. Rationale and support for a One Health  
12  
13 866 program for canine vaccination as the most cost-effective means of controlling zoonotic rabies in  
14  
15 867 endemic settings. *Vaccine* 2017; 35(13):1668-74.  
16  
17  
18  
19 868 52. Dodet B, Tejiokem MC, Aguemon AR, Bourhy H. Human rabies deaths in Africa: breaking  
20  
21 869 the cycle of indifference. *International health* 2015; 7(1):4-6.  
22  
23  
24  
25 870 53. Adesina MA, Olufadewa II, OgaH YI, Nwachukwu N. Incidence and Mortality from a  
26  
27 871 Neglected Tropical Disease (Rabies) in 28 African Countries. *Acta Neuropathologica*  
28  
29 872 *Communications* 2020; 64(2):46-51.  
30  
31  
32  
33 873 54. Interafrican Bureau for Animal Resources. Rabies distribution, 2013. <https://www.aui->  
34  
35 874 [ibar.org/rabies#Distribution\\_Map\\_for\\_Africa](https://www.aui-ibar.org/rabies#Distribution_Map_for_Africa)  
36  
37  
38  
39 875 55. Athingo R, Tenzin T, Shilongo A, Hikufe E, Shoombe KK, Khaiseb S, et al. Fighting Dog-  
40  
41 876 Mediated Rabies in Namibia-Implementation of a Rabies Elimination Program in the Northern  
42  
43 877 Communal Areas. *Tropical Medicine and Infectious Diseases* 2020; 5(1):12.  
44  
45  
46  
47 878 56. Muller T, Demetriou P, Moynagh J, Cliquet F, Fooks AR, Conraths FJ, et al. Rabies  
48  
49 879 elimination in Europe: a success story. In: *In Rabies control: towards sustainable prevention at the*  
50  
51 880 *source, compendium of the OIE, Global conf. on Rabies Control, Incheon-Seoul, 7-9 September*  
52  
53 881 *2011. 2012:31-44.*  
54  
55  
56  
57  
58  
59  
60

- 1  
2  
3 882 57. Velasco-Villa A, Escobar LE, Sanchez A, Shi M, Streicker DG, Gallardo-Romero NF, et  
4  
5 883 al. Successful strategies implemented towards the elimination of canine rabies in the Western  
6  
7 884 Hemisphere. *Antiviral research* 2017; 143:1-12.  
8  
9  
10  
11 885 58. World Health Organization. WHO Expert Consultation on Rabies: second report. World  
12  
13 886 Health Organization, 2013. <https://apps.who.int/iris/handle/10665/85346>  
14  
15  
16  
17 887 59. Hemachudha T, Laothamatas J and Rupprecht CE. Human rabies: a disease of complex  
18  
19 888 neuropathogenetic mechanisms and diagnostic challenges. *The Lancet Neurology* 2002; 1(2):101-  
20  
21 889 109.  
22  
23  
24  
25 890 60. Dodet B. The fight against rabies in Africa: From recognition to action. *Vaccine* 2009;  
26  
27 891 27(37):5027-32.  
28  
29  
30  
31 892 61. Kayali U, Mindekem R, Yemadji N, Vounatsou P, Kanninga Y, Ndoutamia AG, et al.  
32  
33 893 Coverage of pilot parenteral vaccination campaign against canine rabies in N'Djamena, Chad.  
34  
35 894 *Bulletin of the World Health Organization* 2003; 81:739-44.  
36  
37  
38  
39 895 62. Franka R, Smith TG, Dyer JL, Wu X, Niezgodna M, Rupprecht CE. Current and future tools  
40  
41 896 for global canine rabies elimination. *Antiviral research* 2013; 100(1):220-5.  
42  
43  
44  
45 897 63. Zemanova S, Korytar L, Benko Z, Prokes M, Ondrejкова A. Ecological Factors of  
46  
47 898 Transmission, Persistence and Circulation of Pathogens In Bat Populations. *Folia Veterinaria*  
48  
49 899 2019; 63(1):32-40.  
50  
51  
52  
53  
54  
55  
56  
57  
58  
59  
60

- 1  
2  
3 900 64. Hampson K, Dushoff J, Cleaveland S, Haydon DT, Kaare M, Packer C and Dobson A.  
4  
5 901 Transmission dynamics and prospects for the elimination of canine rabies. PLoS boil 2009; 7(3):  
6  
7 902 e1000053.  
8  
9  
10  
11 903 65. Minyoo AB, Steinmetz M, Czupryna A, Bigambo M, Mzimhiri I, Powell G, Gwakisa P  
12  
13 904 and Lankester F. Incentives increase participation in mass dog rabies vaccination clinics and  
14  
15 905 methods of coverage estimation are assessed to be accurate. PLoS neglected tropical diseases  
16  
17 906 2015; 9(12): e0004221.  
18  
19  
20  
21 907 66. Lankester F, Davis A, Kinung'hi S, Yoder J, Bunga C, Alkara S, Mzimhiri I, Cleaveland  
22  
23 908 S and Palmer GH. An integrated health delivery platform, targeting soil-transmitted helminths  
24  
25 909 (STH) and canine mediated human rabies, results in cost savings and increased breadth of  
26  
27 910 treatment for STH in remote communities in Tanzania. BMC public health 2019; 19(1): 1398.  
28  
29  
30  
31  
32 911 67. Global Alliance for Rabies Control. Recent Research November 2017, 2017.  
33  
34 912 <https://rabiesalliance.org/resource/recent-research-november-2017>  
35  
36  
37  
38 913 68. MEEREB. Rabies diagnostic and epidemiological data, 2018. [https://www.fondation-](https://www.fondation-merieux.org/wp-content/uploads/2017/11/4th-meereb-2018-florence-cliquet.pdf)  
39  
40 914 [merieux.org/wp-content/uploads/2017/11/4th-meereb-2018-florence-cliquet.pdf](https://www.fondation-merieux.org/wp-content/uploads/2017/11/4th-meereb-2018-florence-cliquet.pdf)  
41  
42  
43 915 69. Wallace RM, Mehal J, Nakazawa Y, Recuenco S, Bakamutumaho B, Osinubi M, et al. The  
44  
45 916 impact of poverty on dog ownership and access to canine rabies vaccination: results from a  
46  
47 917 knowledge, attitudes and practices survey, Uganda 2013. Infectious diseases of poverty 2017;  
48  
49 918 6(1):97.  
50  
51  
52  
53  
54  
55  
56  
57  
58  
59  
60

- 1  
2  
3 919 70. Jibat T, Hogeveen H and Mourits MC. Review on dog rabies vaccination coverage in  
4  
5 920 Africa: a question of dog accessibility or cost recovery? PLoS Negl Trop Dis 2015, 9(2):  
6  
7 921 e0003447.  
8  
9  
10  
11 922 71. Shwiff SA, Hatch B, Anderson A, Nel LH, Leroux K, Stewart D, et al. Towards Canine  
12  
13 923 Rabies Elimination in KwaZulu-Natal, South Africa: Assessment of Health Economic Data.  
14  
15 924 Transboundary and emerging diseases 2016; 63(4):408-15.  
16  
17  
18  
19 925 72. Cleaveland S, Kaare M, Tiringa P, Mlengeya T, Barrat J. A dog rabies vaccination  
20  
21 926 campaign in rural Africa: impact on the incidence of dog rabies and human dog-bite injuries.  
22  
23 927 Vaccine 2003; 21(17-18):1965-73.  
24  
25  
26  
27 928 73. Kaare M, Lembo T, Hampson K, Ernest E, Estes A, Mentzel C, et al. Rabies control in  
28  
29 929 rural Africa: evaluating strategies for effective domestic dog vaccination. 2009; 27(1):152-60.  
30  
31  
32  
33 930 74. Hatch B, Anderson A, Sambo M, Maziku M, Mchau G, Mbunda E, et al. Towards Canine  
34  
35 931 Rabies Elimination in Southern Eastern Tanzania: Assessment of Health Economic Data.  
36  
37 932 Transboundary and emerging diseases 2017; 64(3):951-8.  
38  
39  
40  
41 933 75. Gibson AD, Handel IG, Shervell K, Roux T, Mayer D, Muyila S et al. The Vaccination of  
42  
43 934 35,000 Dogs in 20 Working Days Using Combined Static Point and Door-to-Door Methods in  
44  
45 935 Blantyre, Malawi. PLoS neglected tropical diseases 2016; 10(7):e0004824.  
46  
47  
48  
49 936 76. Léchenne M, Oussiguere, A Naissengar K, Mindekem, R, Mosimann L, Rives, G,  
50  
51 937 Hattendorf, Moto DD, Alfaroukh IO and Zinsstag J. Operational performance and analysis of two  
52  
53 938 rabies vaccination campaigns in N'Djamena, Chad. Vaccine 2016; 34(4): 571-577.  
54  
55  
56  
57  
58  
59  
60

- 1  
2  
3 939 77. Anyiam F, Léchenne M, Mindekem R et al. Cost estimate of canine rabies elimination by  
4  
5 940 parenteral mass vaccination in Chad, 2017.  
6  
7 941 [https://edoc.unibas.ch/57353/1/Lechenne\\_thesis\\_edoc%20version.pdf](https://edoc.unibas.ch/57353/1/Lechenne_thesis_edoc%20version.pdf)  
8  
9  
10  
11 942 78. Zinsstag J, Lechenne M, Laager M, Mindekem R, Oussiguere A, Bidjeh K, et al.  
12  
13 943 Vaccination of dogs in an African city interrupts rabies transmission and reduces human exposure.  
14  
15 944 Science translational medicine 2017; 9(421):eaaf6984.  
16  
17  
18  
19 945 79. Sreenivasan N, Li A, Shiferaw M, Tran CH, Wallace R, Blanton J, et al. Overview of rabies  
20  
21 946 post-exposure prophylaxis access, procurement and distribution in selected countries in Asia and  
22  
23 947 Africa, 2017-2018. Vaccine 2019; 37: A6-A13.  
24  
25  
26  
27 948 80. World Health Organization. 2016: the beginning of the end of rabies? 2016.  
28  
29 949 [https://www.who.int/rabies/resources/tlgh\\_rabies\\_oct\\_2016/en/](https://www.who.int/rabies/resources/tlgh_rabies_oct_2016/en/)  
30  
31  
32  
33 950 81. Bogel K, Motschwiller E. Incidence of rabies and post-exposure treatment in developing  
34  
35 951 countries. Bulletin of the World Health Organization 1986; 64(6):883.  
36  
37  
38  
39 952 82. Taylor LH, Knopf L, Partners for Rabies Prevention. Surveillance of human rabies by  
40  
41 953 national authorities-a global survey. Zoonoses and public health 2015; 62(7):543-52.  
42  
43  
44  
45 954 83. Kamani TM., Kazwala R, Mfinanga, S., Haydon, D, Keyyu, J., Lankester, F. and Buza, J.  
46  
47 955 One Health: a concept led by Africa, with global benefits. The Veterinary Record 2015; 176(19):  
48  
49 956 496.  
50  
51  
52  
53 957 84. Acharya KP, Acharya N, Phuyal S, Upadhyaya M and Steven L. One-health approach: A  
54  
55 958 best possible way to control rabies. One Health 2020; 10: 100161.  
56  
57  
58  
59  
60



- 1  
2  
3 959 85. Jarvis S. Aiming for elimination of dog-mediated human rabies cases by 2030. *Veterinary*  
4  
5 960 *Record* 2016; 178:86-7.  
6  
7  
8  
9 961 86. Tricco AC, Lillie E, Zarin W, O'Brien KK, Colquhoun H, Levac D, et al. PRISMA  
10  
11 962 extension for scoping reviews (PRISMA-ScR): checklist and explanation. *Annals of internal*  
12  
13 963 *medicine* 2018; 169(7):467-73.  
14  
15  
16  
17 964 87. Peters MDJ, Godfrey CM, Khalil H, McInerney P, Parker D, Soares CB. Guidance for  
18  
19 965 conducting systematic scoping reviews. *International journal of evidence-based healthcare*  
20  
21 966 2015;13(3):141-6.  
22  
23  
24  
25 967 88. Arksey H, O'Malley L. Scoping studies: towards a methodological framework.  
26  
27 968 *International journal of social research methodology* 2005;8(1):19-32.  
28  
29  
30  
31 969 89. Tricco AC, Lillie E, Zarin W, O'Brien K, Colquhoun H, Kastner M, et al. A scoping review  
32  
33 970 on the conduct and reporting of scoping reviews. *BMC medical research methodology* 2016;  
34  
35 971 16(1):15.  
36  
37  
38  
39 972 90. Edward FD, Osei-Tutu A, Gbeddy K, Quist C. A retrospective study of rabies cases at  
40  
41 973 Techiman Municipal, Ghana, 2009-2012. *International Journal of Infectious Diseases* 2014;  
42  
43 974 21:179.  
44  
45  
46  
47 975 91. Kardjadj M, Yahiaoui F, Ben-Mahdi MH. Incidence of human dog-mediated zoonoses and  
48  
49 976 demographic characteristics/vaccination coverage of the domestic dog population in Algeria. *Rev.*  
50  
51 977 *Sci., Tech. Off. Int. Epiz* 2019;38(3):000-000.  
52  
53  
54  
55  
56  
57  
58  
59  
60

- 1  
2  
3 978 92. Reynes JM, Andriamandimby SF, Razafitrimo GM, Razainirina J, Jeanmaire EM, Bourhy  
4  
5 979 H, et al. Laboratory surveillance of rabies in humans, domestic animals, and bats in madagascar  
6  
7 980 from 2005 to 2010. *Advances in preventive medicine* 2011; 2011:6.  
8  
9 981 <https://doi.org/10.4061/2011/727821>  
10  
11  
12  
13 982 93. Nyakarahuka L, Tweheyo R. Occurrence and mortality rates from rabies in Uganda, 2001-  
14  
15 983 2009. *International journal of infectious Diseases* 2012; 16:e458.  
16  
17  
18  
19 984 94. Masiira B, Makumbi I, Matovu JKB, Ario AR, Nabukenya I, Kihembo C, et al. Long term  
20  
21 985 trends and spatial distribution of animal bite injuries and deaths due to human rabies infection in  
22  
23 986 Uganda, 2001-2015. *PloS one* 2018;13(8):e0198568.  
24  
25  
26  
27 987 95. Sambo M, Cleaveland S, Ferguson H, Lembo T, Simon C, Urassa H, et al. The burden of  
28  
29 988 rabies in Tanzania and its impact on local communities. *Plos Negl Trop Dis* 2013;7(11): e2510.  
30  
31  
32  
33 989 96. Mtema Z, Changalucha J, Cleaveland S, Elias M, Ferguson HM, Halliday JE, et al. Mobile  
34  
35 990 phones as surveillance tools: implementing and evaluating a large-scale intersectoral surveillance  
36  
37 991 system for rabies in Tanzania. *Plos medicine* 2016;13(4): e1002002.  
38  
39  
40  
41 992 97. Teklu GG, Hailu TG, Eshetu GR. High incidence of human rabies exposure in  
42  
43 993 northwestern tigray, Ethiopia: A four-year retrospective study. *Plos neglected tropical diseases*  
44  
45 994 2017; 11(1):e0005271.  
46  
47  
48  
49 995 98. Zimmer BL, Gamble L, Foster R, Kennedy N, Mayer D, Bailey J Burdon, et al. Assessment  
50  
51 996 of the impact on paediatric rabies at Queen Elizabeth Central Hospital, Blantyre, Malawi,  
52  
53  
54  
55  
56  
57  
58  
59  
60

- 1  
2  
3 997 following a mass canine rabies vaccination programme. *International Journal of Infectious*  
4  
5 998 *Diseases* 2019; 79:64.  
6  
7  
8  
9 999 99. Osaghae DO. Animal and human bites in children. *West African journal of medicine* 2011;  
10  
11 1000 30(6):421-424.  
12  
13  
14  
15 1001 100. Ogundare EO, Olatunya OS, Oluwayemi IO, Inubile AJ, Taiwo AB, Agaja OT, et al.  
16  
17 1002 Pattern and outcome of dog bite injuries among children in Ado-Ekiti, Southwest Nigeria. *Pan*  
18  
19 1003 *African Medical Journal* 2017; 27:81.  
20  
21  
22  
23 1004 101. Abubakar SA, Bakari AG. Incidence of dog bite injuries and clinical rabies in a tertiary  
24  
25 1005 health care institution: a 10-year retrospective study. *Annals of African medicine* 2012; 11(2):108-  
26  
27 1006 11  
28  
29  
30  
31 1007 102. Kent SJW, Naicker B, Wood DR. Demographics and management of dog-bite victims at a  
32  
33 1008 level two hospital in KwaZulu-Natal. *South African Medical Journal* 2012; 102(11):845-7.  
34  
35  
36  
37 1009 103. De Nardo P, Gentilotti E, Vairo F, Nguhuni B, Chaula Z, Nicastrì E, et al. A retrospective  
38  
39 1010 evaluation of bites at risk of rabies transmission across 7 years: The need to improve surveillance  
40  
41 1011 and reporting systems for rabies elimination. *PloS one* 2018;13(7): e0197996.  
42  
43  
44  
45 1012 104. Lushasi K, Steenson R, Bernard J, Changalucha JJ, Govella NJ, Haydon DT, et al. One  
46  
47 1013 Health in practice: using Integrated Bite Case Management to increase detection of rabid animals  
48  
49 1014 in Tanzania. *Frontiers in Public health* 2020; 8:13.  
50  
51  
52  
53  
54  
55  
56  
57  
58  
59  
60

- 1  
2  
3 1015 105. Changalucha J, Steenson R, Grieve E, Cleaveland S, Lembo T, Lushasi K, et al. The need  
4  
5 1016 to improve access to rabies post-exposure vaccines: Lessons from Tanzania. *Vaccine* 2019;37:  
6  
7 1017 A45-53.  
8  
9  
10  
11 1018 106. Yizengaw E, Getahun T, Mulu W, Ashagrie M, Abdela I, Geta M. Incidence of human  
12  
13 1019 rabies virus exposure in northwestern Amhara, Ethiopia. *BMC infectious diseases* 2018; 18(1):1-  
14  
15 1020 7.  
16  
17  
18  
19 1021 107. Jemberu WT, Molla W, Almaw G, Alemu S. Incidence of rabies in humans and domestic  
20  
21 1022 animals and people's awareness in North Gondar Zone, Ethiopia. *Plos Negl Trop Dis* 2013;7(5):  
22  
23 1023 e2216.  
24  
25  
26  
27 1024 108. Fevre EM, Kaboyo RW, Persson V, Edelsten M, Coleman PG, Cleaveland S. The  
28  
29 1025 epidemiology of animal bite injuries in Uganda and projections of the burden of rabies. *Tropical*  
30  
31 1026 *medicine & international health* 2005; 10(8):790-8.  
32  
33  
34  
35 1027 109. Frey J, Mindekem R, Kessely H, Doumagoum MD, Naissengar S, Zinsstag J, et al. Survey  
36  
37 1028 of animal bite injuries and their management for an estimate of human rabies deaths in N'Djamena,  
38  
39 1029 Chad. *Tropical Medicine & International Health* 2013; 18(12):1555-62.  
40  
41  
42  
43 1030 110. Olugasa BO, Odeniyi AO, Adeogun AO, Adeola OA. Antibody levels against rabies  
44  
45 1031 among occupationally exposed individuals in a Nigerian University. *Vet Ital* 2010; 46(1):21-8.  
46  
47  
48  
49 1032 111. Harry TO, Adeiga A, Anyiwo CE and Nasidi A. Anti-rabies treatment of dog-bite victims  
50  
51 1033 in Lagos, Nigeria: trial of suckling mouse brain and fetal bovine kidney cell vaccines. *vaccine*  
52  
53 1034 1984; 4: 257-260.  
54  
55  
56  
57  
58  
59  
60

- 1  
2  
3 1035 112. World Health Organization Technical Report Series. WHO expert consultation on rabies,  
4  
5 1036 2005.  
6  
7  
8 1037 [https://apps.who.int/iris/bitstream/handle/10665/85346/9789240690943\\_eng.pdf?sequence=1](https://apps.who.int/iris/bitstream/handle/10665/85346/9789240690943_eng.pdf?sequence=1)  
9  
10  
11 1038 113. World Health Organization. WHO Expert Consultation on Rabies-World Health  
12  
13 1039 [.https://apps.who.int/iris/bitstream/handle/10665/85346/9789241209823\\_eng.pdf?sequence=1](https://apps.who.int/iris/bitstream/handle/10665/85346/9789241209823_eng.pdf?sequence=1)  
14  
15  
16  
17 1040 114. Ren J, Yao L, Sun J and Gong Z. Zagreb regimen, an abbreviated intramuscular schedule  
18  
19 1041 for rabies vaccination. *Clinical and Vaccine Immunology* 2015; 22(1):1-5  
20  
21  
22  
23 1042 115. Banyard AC, Horton DL, Freuling C, Müller T. and Fooks AR. Control and prevention of  
24  
25 1043 canine rabies: the need for building laboratory-based surveillance capacity. *Antiviral Research*  
26  
27 1044 2013; 98(3): 357-364.  
28  
29  
30  
31 1045 116. Kirby JD, Chipman RB, Nelson KM, Rupprecht CE, Blanton JD, Algeo TP, et al. Enhanced  
32  
33 1046 Rabies Surveillance to Support Effective Oral Rabies Vaccination of Raccoons in the Eastern  
34  
35 1047 United States. *Tropical medicine and infectious disease* 2017; 2(3):34.  
36  
37  
38  
39 1048 117. Wilde H, Ghai S, Hemachudha T. Rabies: Still a silent killer targeting the poor. *Vaccine*  
40  
41 1049 2017; 35(18):2293.  
42  
43  
44  
45 1050 118. Wambura G, Mwatondo A, Muturi M, Nasimiyu C, Wentworth D, Hampson K, et al.  
46  
47 1051 Rabies vaccine and immunoglobulin supply and logistics: challenges and opportunities for rabies  
48  
49 1052 elimination in Kenya. *Vaccine* 2019; 37: A28-34.  
50  
51  
52  
53 1053 119. World Health Organization. WHO expert consultation on rabies: third report. 1012 edition.  
54  
55 1054 World Health Organization, 2018.  
56  
57  
58  
59  
60

- 1  
2  
3 1055 120. Hergert M, Le Roux K and Nel LH. Risk factors associated with nonvaccination rabies  
4  
5 1056 status of dogs in KwaZulu-Natal, South Africa. *Veterinary Medicine: Research and Reports* 2016,  
6  
7 1057 7: 75.  
8  
9  
10  
11 1058 121. Taylor LH, Hampson K, Fahrion A, Abela-Ridder B, Nel LH. Difficulties in estimating the  
12  
13 1059 human burden of canine rabies. *Acta Tropica* 2017; 165:133-40.  
14  
15  
16  
17 1060 122. Scott Terence P, Coetzer Andre, Fahrion Anna S, Nel Louis H. Addressing the Disconnect  
18  
19 1061 between the Estimated, Reported, and True Rabies Data: The Development of a Regional African  
20  
21 1062 Rabies Bulletin. *Frontiers in veterinary science* 2017; 4:18.  
22  
23  
24  
25 1063 123. Scott TP, Coetzer A, De Balogh K, Wright N and Nel LH. The Pan-African Rabies Control  
26  
27 1064 Network (PARACON): A unified approach to eliminating canine rabies in Africa. *Antiviral*  
28  
29 1065 *research* 2015; 124: 93-100.  
30  
31  
32  
33 1066 124. Gongal G, Wright AE. Human rabies in the WHO Southeast Asia Region: forward steps  
34  
35 1067 for elimination. *Advances in Preventive Medicine* 2011. <https://doi.org/10.4061/2011/383870>  
36  
37  
38  
39 1068 125. Mbilo C, Coetzer A, Bonfoh B, Angot A, Bebay C, Cassama B, et al. Dog rabies control  
40  
41 1069 in West and Central Africa: A review. *Acta Tropica* 2020; 105459.  
42  
43  
44  
45 1070 126. World Health Organization. Driving progress towards rabies elimination. In:  
46  
47 1071 <file:///C:/Users/Staff/Downloads/WHO-CDS-NTD-NZD-2019.04-eng.pdf>. 2019.  
48  
49  
50  
51 1072 127. Broban A, Tejiokem MC, Tiembre I, Druelles S, L'Azou M. Bolstering human rabies  
52  
53 1073 surveillance in Africa is crucial to eliminating canine-mediated rabies. *PloS neglected tropical*  
54  
55 1074 *diseases* 2018; 12(9):e0006367.  
56  
57  
58  
59  
60

- 1  
2  
3 1075 128. Cleaveland S, Sharp J, Abela-Ridder B, Allan KJ, Buza J, Crump JA, Davis A, Del Rio  
4  
5 1076 Vilas, VJ, De Glanville WA, Kazwala RR and Kibona T. One Health contributions towards more  
6  
7 1077 effective and equitable approaches to health in low-and middle-income countries. *Philosophical*  
8  
9 1078 *Transactions of the Royal Society B: Biological Sciences* 2017; 372(1725): 20160168.  
10  
11  
12  
13 1079 129. Tataryn J, Buck P A. The Canadian Rabies Management Plan: An integrated approach to  
14  
15 1080 the coordination of rabies activities in Canada. *Canada communicable disease report* 2016; 42  
16  
17 1081 (6):135-6.  
18  
19  
20  
21 1082 130. Kappler A, Wandeler AI and Capt S. Ten years of rabies control by oral vaccination of  
22  
23 1083 foxes in Switzerland. *EUR* 1988.  
24  
25 1084 [https://orbi.uliege.be/bitstream/2268/211695/1/CDNA114392AC\\_001.pdf#page=63](https://orbi.uliege.be/bitstream/2268/211695/1/CDNA114392AC_001.pdf#page=63)  
26  
27  
28  
29 1085 131. Tolson ND, Charlton KM, Casey GA, Knowles MK, Rupprecht CE, Lawson KF, et al.  
30  
31 1086 Immunization of foxes against rabies with a vaccinia recombinant virus expressing the rabies  
32  
33 1087 glycoprotein. *Archives of virology* 1988; 102(3-4):297-301.  
34  
35  
36  
37 1088 132. Maki J, Guiot AL, Aubert M, Brochier B, Cliquet F, Hanlon CA, et al. Oral vaccination of  
38  
39 1089 wildlife using a vaccinia-rabies-glycoprotein recombinant virus vaccine (RABORAL V-RG®): a  
40  
41 1090 global review. *Veterinary research* 2017; 48(1):57.  
42  
43  
44  
45 1091 133. Yakobson BA, King RJ, David D, Sheichat N, Rotenderg D, Dveres N, Samina I, Zaharin  
46  
47 1092 Y, Perl S, Orgad U (1999) Comparative efficacy of two oral vaccines in captive jackals (*Canis*  
48  
49 1093 *aureus*). 10th Annual Rabies in the Americas meeting: November 14–19, San Diego, California,  
50  
51 1094 USA  
52  
53  
54  
55  
56  
57  
58  
59

1  
2  
3 1095 134. Rupprecht CE, Wiktor TJ, Johnston D H, Hamir AN, Dietzschold B, Wunner W H, et al.  
4  
5 1096 Oral immunization and protection of raccoons (*Procyon lotor*) with a vaccinia-rabies glycoprotein  
6  
7 1097 recombinant virus vaccine. Proceedings of the National Academy of Sciences of the United States  
8  
9 1098 of America 1986; 83(20):7947-50.

10  
11  
12  
13 1099 135. Rosatte RC. Rabies in Canada-history, epidemiology and control. The Canadian veterinary  
14  
15 1100 journal 1988; 29(4):362-5.

16  
17  
18  
19 1101

20  
21 1102

22  
23 1103

24  
25 1104

26  
27 1105

28  
29 1106

30  
31 1107

32  
33 1108

34  
35 1109

36  
37 1110

38  
39 1111

40  
41 1112

42  
43 1113

44  
45 1114

46  
47 1115

48  
49 1116

50  
51 1117

52  
53 1118

54  
55  
56  
57  
58  
59  
60



Table 1: Extracting and charting data table

Rabies mortality and morbidity associated with animal bites in Africa: A case for Integrated Rabies Diseases Surveillance, Prevention and Control - A Scoping review

| Author(year) and country      | Study designs              | Participants/Comparators             | Interventions and Control conditions/Exposures                                                                               | Outcomes                                                                                                                                                                                                                                                                                                                                       | Key findings/Gaps/Challenges                                                                                                              |
|-------------------------------|----------------------------|--------------------------------------|------------------------------------------------------------------------------------------------------------------------------|------------------------------------------------------------------------------------------------------------------------------------------------------------------------------------------------------------------------------------------------------------------------------------------------------------------------------------------------|-------------------------------------------------------------------------------------------------------------------------------------------|
| Rabies prevention and control |                            |                                      |                                                                                                                              |                                                                                                                                                                                                                                                                                                                                                |                                                                                                                                           |
| Harry 1984<br><br>Nigeria     | Randomized control trial   | 136 patients aged three to 74 years. | Controlled treatment of dog-bite victims with suckling mouse brain (SMBV) versus fetal bovine kidney (FBKV) rabies vaccines. | By day 7, 26.7% of SMBV recipients and 28.6% of FBKV recipients showed antibody response<br><br>These percentages increased to 95.1 and 81.1, respectively, by day 14, and by day 20 (for SMBV recipients) or day 30 (FBKV recipients) the response was 100%.<br><br>Titres dropped by day 90, but in no case to below 1 EU ml <sup>-1</sup> . | We have concluded that both vaccines are equally efficacious and well tolerated.                                                          |
| Tefera 2002<br><br>Ethiopia   | 5-year retrospective study | 15,940 people dog bite victims       | post exposure anti-rabies prophylaxis treatment                                                                              | 320 people were reported to have died of rabies.                                                                                                                                                                                                                                                                                               | The result supports the hypothesis that there is a lack of appropriate reporting system on prevalence of rabies and its impact on humans. |

|                                                                                        |                              |                                                   |                                                                                                                                                          |                                                                                                                                                                                                                                                              |                                                                                                                                                                                                                                                                             |                                                                                                                                                                                                                                                                               |
|----------------------------------------------------------------------------------------|------------------------------|---------------------------------------------------|----------------------------------------------------------------------------------------------------------------------------------------------------------|--------------------------------------------------------------------------------------------------------------------------------------------------------------------------------------------------------------------------------------------------------------|-----------------------------------------------------------------------------------------------------------------------------------------------------------------------------------------------------------------------------------------------------------------------------|-------------------------------------------------------------------------------------------------------------------------------------------------------------------------------------------------------------------------------------------------------------------------------|
| 1<br>2<br>3<br>4<br>5<br>6<br>7<br>8<br>9<br>10<br>11<br>12<br>13<br>14<br>15<br>16    | Deressa 2010<br><br>Ethiopia | 8-year retrospective study                        | 17,204 people received post exposure treatment                                                                                                           | Post Exposure Prophylaxis<br><br>5% suspension of phenolized sheep brain tissue.                                                                                                                                                                             | The fatal human cases were 386 humans with annual range of 35 to 58. The age and sex specific distribution showed that the most fatal cases were 42% from the age group 0-14 category.<br><br>According to this record 66.66% of deaths were males and 33.33% were females. | PEP against rabies varies from 35.96% to 64.4% across the study.<br><br>The recorded data showed the underestimate of rabies diagnosis, post exposure prophylaxis and fatal human cases, which could be attributed due to the absence of national rabies surveillance system. |
| 17<br>18<br>19<br>20<br>21<br>22<br>23<br>24<br>25<br>26                               | Olugasa 2010<br><br>Nigeria  | Clinical trial                                    | Of these 70 healthy individuals, 29 (41.4%) consisting of 15 zoological garden workers (75.0%), 13 veterinarians (65.0%) and 1 veterinary student (3.3%) | A purified chicken-embryo cell rabies vaccine One dose (1 ml of $\geq 2.5$ IU/ml vaccine potency) was administered intramuscularly every two years immune to rabies virus (antibody titre $>0.5$ equivalent units per ml), while 41 (58.6%) were not immune. | Overall, antibody levels increased from 1-5 years to 10-30 years on the job.                                                                                                                                                                                                | Almost all those who had spent at least 10 years on the job had higher levels of rabies vaccination compliance and were immune.                                                                                                                                               |
| 27<br>28<br>29<br>30<br>31<br>32                                                       | Mazigo 2010<br><br>Tanzania  | A 5-year retrospective study                      | A total of 767 bite injuries inflicted by rabies-suspected animals were reported.                                                                        | Adherence to post-exposure prophylaxis (PEP) regimen                                                                                                                                                                                                         | mean annual incidence of ~58 cases per 100,000 (52.5% males, 47.5% females)                                                                                                                                                                                                 | Only 28% of the victims completed the vaccination regime.                                                                                                                                                                                                                     |
| 33<br>34<br>35<br>36<br>37<br>38<br>39<br>40<br>41<br>42<br>43<br>44<br>45<br>46<br>47 | Jemberu 2013<br><br>Ethiopia | Cross-sectional and year prospective cohort study | 120 selected dog owners 5 traditional healers in North Gondar zone, Ethiopia.                                                                            | clinical observation<br><br>A questionnaire on rabies people's knowledge and practices                                                                                                                                                                       | Annual estimated rabies incidence of 2.33 cases per 100,000 in humans.<br><br>During the follow up period, a total of 32 in humans were recorded                                                                                                                            | Vaccination of dogs, proper post exposure management, and increasing the awareness of the community are suggested to reduce the disease burden.                                                                                                                               |

|                           |                                       |                                                                                                                                                             |                                                                   |                                                                                                                                                           |                                                                                                                                                                                         |
|---------------------------|---------------------------------------|-------------------------------------------------------------------------------------------------------------------------------------------------------------|-------------------------------------------------------------------|-----------------------------------------------------------------------------------------------------------------------------------------------------------|-----------------------------------------------------------------------------------------------------------------------------------------------------------------------------------------|
|                           |                                       |                                                                                                                                                             |                                                                   | from which 3 humans ended with fatality.                                                                                                                  |                                                                                                                                                                                         |
| Edward 2014<br>Ghana      | 3-year retrospective study            | 546 dog-bite victims were reported; 295 (54%) were children < 15 years, 169 (31%) were between 15-59 years and 82 (13%) were above 60 years.                | Post-exposure prophylaxis                                         | 54 dog-bite victims bitten by rabies-positive dogs were reported.                                                                                         | 24% of dog-bite victims did not complete the post exposure anti human rabies vaccine course and were not likely to be postexposure prophylaxis.                                         |
| Ramos 2015<br>Ethiopia    | A retrospective, registry-based study | A total of 683 persons (51.1% females, 73% children) with animal- related bites.                                                                            | All the patients received an anti-rabies nervous-tissue vaccine.  | No important complications were reported.                                                                                                                 | 99% of whom completed the vaccination course.                                                                                                                                           |
| Kardjadj 2019<br>Algeria  | A 13- year retrospective study        | Annual average of PEP cases: 96,203 people                                                                                                                  | post-exposure prophylaxis and dog vaccination                     | Annual average of 20.6 human rabies deaths                                                                                                                | Overall dog rabies vaccination coverage rate of 68.78%.                                                                                                                                 |
| Pfukenyi 2009<br>Zimbabwe | A retrospective study                 | A total of 57 rabies-suspect human samples were examined and The 15–19 year age group had the highest number of cases.                                      | Dog vaccination coverage                                          | Among rabies-suspect, 42 (73.7%) were positive.                                                                                                           | During the study period, there was an inverse relationship between dog vaccination coverage and dog rabies cases. Dog vaccination coverage decreased across the study from 100% to 50%. |
| Punguyire 2017<br>Ghana   | 6-year retrospective records review   | 680 dog victims, the median age of rabies victims was 30 (range 3-80 years).                                                                                | Post-exposure prophylaxis of rabies<br><br>Dog rabies vaccination | 13 cases of human rabies were recorded.                                                                                                                   | Less than 35% of the suspected rabies dogs that bit people over the period were vaccinated. About 20% of the offending dogs had unknown vaccination status.                             |
| Teklu 2017<br>Ethiopia    | A Four-Year Retrospective Study       | In total, 2180 human rabies exposure cases were registered and followed for their PEP. the greatest exposed age group was >=15 years in all the study years | Prior to PEP administration for humans.<br><br>Dog vaccination    | The incidence of human rabies exposure cases calculated per 100,000 populations was 35.8, 63.0, 89.8 and 73.1 in 2012, 2013, 2014 and 2015, respectively. | The total annually allocated PEP to the region, nearly 60% was utilized.                                                                                                                |

|                           |                                            |                                                                                                                                                                                     |                                                                                            |                                                                                                      |                                                                                                                                                                                                                                                                                                                                                                                                                    |
|---------------------------|--------------------------------------------|-------------------------------------------------------------------------------------------------------------------------------------------------------------------------------------|--------------------------------------------------------------------------------------------|------------------------------------------------------------------------------------------------------|--------------------------------------------------------------------------------------------------------------------------------------------------------------------------------------------------------------------------------------------------------------------------------------------------------------------------------------------------------------------------------------------------------------------|
|                           |                                            |                                                                                                                                                                                     |                                                                                            |                                                                                                      | Data on the coverage of preventive dog vaccination and demography were not evident in the study area.                                                                                                                                                                                                                                                                                                              |
| De Nardo 2018<br>Tanzania | 6-year retrospective study                 | 14,624 patients attended the clinics because of animal's bites. Eighty-three per cent (12,098) individuals came from Dodoma Region.                                                 | The adherence to post-exposure prophylaxis (PEP)                                           | Mean incidence of 74 bites considered at risk of rabies transmission per 100,000 persons per year.   | Overall, 46.0% of the total number of individuals exposed to potentially rabid animals completed the PEP course, while 6.5% (698) did not receive any dose.<br><br>Living in rural area was statistically associated with loss to follow up after the first dose<br><br>( $p < 0.001$ ) or after the second dose ( $p < 0.001$ ) Females were more likely to be lost after the first dose ( $p = 0.006$ ).         |
| Yizengaw 2018<br>Ethiopia | 2-year retrospective cross-sectional study | A total of 924 human rabies exposure cases received the anti-rabies post-exposure prophylaxis. Of these, males accounted 55.2% and the median age was 18 year (ranges: 1–80 years). | anti-rabies post exposure prophylaxis<br><br>A structured data collection questionnaire    | High incidence rate of rabies exposure was reported during spring (339%) and summer (26.4%) seasons. | There was significant difference between rural and urban exposure cases ( $p = 0.001$ ) in respect to the time of arrival to the hospital. There was high human rabies exposure rate in children and in the rural community.<br><br>The health status of most dogs (67.3%) involved in biting was unknown (they were stray dogs) and 28.8% were sick: develop the signs of rabid animal within ten days follow up. |
| Gebru 2019<br>Ethiopia    | One year retrospective study               | 368 human rabies exposure cases. Age group of 5 to 14 years old.                                                                                                                    | Recommendation to start PEP immediately after exposure, depending on the type of exposure. | Incidence of human rabies exposure was 40 per 100,000 populations.                                   | A higher proportion of human rabies exposures was caused by unprovoked dogs (96.5%; 95% CI, 94.0–98.0), and of these, the majority were                                                                                                                                                                                                                                                                            |

|                           |                            |                                                                                                                    |                                                                                                                                                          |                                                                                                                                                                                                                                                                                                                                                                                                |                                                                                                                                                                                                                                                                                                                                                                                            |
|---------------------------|----------------------------|--------------------------------------------------------------------------------------------------------------------|----------------------------------------------------------------------------------------------------------------------------------------------------------|------------------------------------------------------------------------------------------------------------------------------------------------------------------------------------------------------------------------------------------------------------------------------------------------------------------------------------------------------------------------------------------------|--------------------------------------------------------------------------------------------------------------------------------------------------------------------------------------------------------------------------------------------------------------------------------------------------------------------------------------------------------------------------------------------|
|                           |                            |                                                                                                                    | Dog vaccination 14.1%                                                                                                                                    |                                                                                                                                                                                                                                                                                                                                                                                                | unvaccinated (85.9%; 95% CI, 81.9–89.1).                                                                                                                                                                                                                                                                                                                                                   |
| Zimmer 2019<br>Malawi     | 6-year Retrospective study | Children victims of dog bite. The average age was seven years (range 3–11).                                        | Pre and post a comprehensive canine vaccine campaign                                                                                                     | 14 paediatric rabies cases were found during the study period. More males than females were affected (males: 10 (71%); females: 4 (29%)).                                                                                                                                                                                                                                                      | The study shows the importance of eliminating human rabies through canine rabies vaccination.                                                                                                                                                                                                                                                                                              |
| Rabies surveillance       |                            |                                                                                                                    |                                                                                                                                                          |                                                                                                                                                                                                                                                                                                                                                                                                |                                                                                                                                                                                                                                                                                                                                                                                            |
| Fevre 2005<br>Uganda      | Cross-sectional study      | A total of 517 patients were interviewed in 10 randomly selected districts in Uganda in the 3 months of the study. | Passive surveillance<br><br>Survey of dog bite injuries and rabies post-exposure treatment activities in treatment centres supplied with rabies vaccine. | Death in absence of post-exposure prophylaxis (PET), 592 (95% CI 345–920) deaths<br><br>One dose of PET is sufficient for protection following a rabid animal bite, 20 (95% CI 5–50) deaths annually. Complete course of PET is required for protection following a rabid animal bite, up to 210 (95% CI 115–359) deaths would occur, as 41% of patients did not complete their course of PET. | Most patients are bitten by dogs, and that a considerable proportion of these are young children, who are at greater risk of developing rabies in the absence of treatment due to the location of the bites they receive.<br><br>Active animal bite surveillance studies are required to improve our mortality estimates and determine the true burden of rabies in the Ugandan population |
| Reynes 2011<br>Madagascar | 6-year retrospective study | 11 human samples were tested for rabies.                                                                           | Laboratory Surveillance of domestic or tame wild terrestrial mammal and dog brains tested.                                                               | Nine of the 11 suspected human cases tested were laboratory confirmed for rabies.                                                                                                                                                                                                                                                                                                              | Rabies remains endemic in Madagascar. this study has found the lack of epidemiological data in Madagascar                                                                                                                                                                                                                                                                                  |

|                            |                                |                                                                                                                                                                                                                                                |                                                                                                            |                                                                                                                                |                                                                                                                                                                                                                                                   |
|----------------------------|--------------------------------|------------------------------------------------------------------------------------------------------------------------------------------------------------------------------------------------------------------------------------------------|------------------------------------------------------------------------------------------------------------|--------------------------------------------------------------------------------------------------------------------------------|---------------------------------------------------------------------------------------------------------------------------------------------------------------------------------------------------------------------------------------------------|
| Nyakarahuka 2012<br>Uganda | 9-year retrospective study     | Cumulative total of 117,085 rabies cases were reported in 9 years.                                                                                                                                                                             | Surveillance reports from all the districts.                                                               | A total of 371 deaths of rabies were recorded.                                                                                 | Findings emphasize the need for active surveillance; follow up of people bitten by animals and mass dog vaccinations to alleviate this zoonotic threat.                                                                                           |
| Sambo 2013<br>Tanzania     | Cross-sectional study          | Human population (district)<br>Ulanga: 193280<br>Kilombero: 321611<br>Serengeti: 176057<br><br>The ages of suspect bite victims ranged from 1 to 90 years. The majority of suspect bite victims (51%) were children less than 15 years of age. | Extensive investigative interviews were used to estimate the incidence of human deaths and bite exposures. | Average annual incidence/<br>100,000<br><br>Bites: 37.1;11.3 and 33.5 respectively<br><br>Death: 2.4; 0.8 and 1.4 respectively | Ninety-four percent (391/415) of these suspects bite victims reported to health facilities for PEP.                                                                                                                                               |
| Adomako 2018<br>Ghana      | 3-year retrospective study     | Overall, 4821 dog victims' bites. Most of the cases were in children aged below 10 years.                                                                                                                                                      | The health and veterinary services on issues related to surveillance and data quality.                     | Annual incidence of rabies cases of 172 per a population of 100,000.                                                           | In the 82% of cases where data was available, no postexposure prophylaxis (PEP) was administered. The fatality rate was 100%.<br><br>The study found gross disparities in the number of reported events and overall impression of underreporting. |
| Masiira 2018<br>Uganda     | A 14-year retrospective review | A total of 208,720 patients with animal bite injuries were treated at health facilities across the country.<br><br>Up to 81% were patients $\geq 5$ years of age and 19% (n = 9,102) were below 5 years of age.                                | Epidemiological surveillance data                                                                          | A total of 486 suspected human rabies deaths were reported.                                                                    | Strengthening rabies surveillance, controlling rabies in dogs and ensuring availability of post exposure prophylaxis at lower health facilities are the best approach of eliminating rabies.                                                      |

|                                           |                                                             |                                                                                                                                                             |                                                                                                                                                                                                    |                                                                                                                                                                                                        |                                                                                                                                                                                                                                                                                                                                                                                     |
|-------------------------------------------|-------------------------------------------------------------|-------------------------------------------------------------------------------------------------------------------------------------------------------------|----------------------------------------------------------------------------------------------------------------------------------------------------------------------------------------------------|--------------------------------------------------------------------------------------------------------------------------------------------------------------------------------------------------------|-------------------------------------------------------------------------------------------------------------------------------------------------------------------------------------------------------------------------------------------------------------------------------------------------------------------------------------------------------------------------------------|
| <p>Tiembre 2018<br/>Ivory Coast</p>       | <p>A 2-year descriptive prospective observational study</p> | <p>2968 weekly reports, all were received by the NIPH Anti-rabies Center. Almost one-half of the human rabies cases were in children &lt;=15 years old.</p> | <p>Human rabies surveillance system in those 28 NIPH local units, with specific goals of improving the infrastructure, training, communication, and government involvement.</p>                    | <p>50 cases of human rabies (15±18 cases/year; annual incidence = 0.06–0.08per 100,000) and more than 30,000 animal exposures (annual incidence = 41.8–48.0 per 100,000).</p>                          | <p>The study is the result of enhancing human rabies surveillance in Ivory Coast</p> <p>None of cases had received PEP. Post-exposure prophylaxis with rabies vaccine was administered to all animal exposure victims presenting at the NIPH local units; only about 57% completed the full immunization schedule.</p>                                                              |
| <p>Ngugi 2018<br/>Kenya</p>               | <p>5-year retrospective study</p>                           | <p>Among 7307 records analyzed, 7201 (98.6%) had age recorded.</p> <p>The median age was 22 years</p>                                                       | <p>Surveillance of PEP was given and number of PEP doses administered.</p>                                                                                                                         | <p>Human animal-bite injuries incidence was 289 per 100,000 persons with the highest incidence reported at 302 per 100,000 and lowest at 121 per 100,000 persons.</p>                                  | <p>The study concluded preventing dog bites would most effectively reduce bite injuries by improving public health education among children below 15 years, encouraging early PEP initiation and completion, development and implementation of responsible dog ownership and animal behaviour educational programmes as well as improving human and veterinary health linkages.</p> |
| <p>Hikufe 2019<br/>Namibia</p>            | <p>6-year retrospective study</p>                           | <p>Of the total number of 113 cases, the majority (67%) were children and teenagers below 16 years of age, peaking at 5–9 years.</p>                        | <p>Human rabies surveillance data were retrieved from the epidemiological database of the Ministry of Health.</p> <p>Surveillance in animals is based on the reporting of all suspected cases.</p> | <p>Rabies cases have been above 16 cases per year from 2011 until 2015 with a maximum of 23 cases observed in 2015.</p> <p>Incidence: 1.0 and 2.4 per 100,000 inhabitants and per year on average.</p> | <p>Kavango, the region with the highest human rabies incidence was also the region with the lowest animal rabies surveillance intensity.</p>                                                                                                                                                                                                                                        |
| <p>Rabies surveillance and prevention</p> |                                                             |                                                                                                                                                             |                                                                                                                                                                                                    |                                                                                                                                                                                                        |                                                                                                                                                                                                                                                                                                                                                                                     |

|                                                                                        |                                                                          |                                |                                                                                                                                                                                                                                                                                     |                                                                                                                                                                                                                    |                                                                                                                       |                                                                                                                                                                                                                                                                                                                                                                                     |
|----------------------------------------------------------------------------------------|--------------------------------------------------------------------------|--------------------------------|-------------------------------------------------------------------------------------------------------------------------------------------------------------------------------------------------------------------------------------------------------------------------------------|--------------------------------------------------------------------------------------------------------------------------------------------------------------------------------------------------------------------|-----------------------------------------------------------------------------------------------------------------------|-------------------------------------------------------------------------------------------------------------------------------------------------------------------------------------------------------------------------------------------------------------------------------------------------------------------------------------------------------------------------------------|
| 1<br>2<br>3<br>4<br>5<br>6<br>7<br>8<br>9<br>10<br>11<br>12                            | Andriamandimby 2013<br><br>La Reunion,<br><br>Mayotte, and<br>Madagascar | 6-year Retrospective study     | 24 946 patients visited the ARMC at the IPM, of which 97.2% (n = 24 299) received PEP. Males represented 54.3% (n = 13 556) of the cases and ranged in age from one to 97 years (median = 18 years). Children under 15 years old represented 40.5% (n = 10 107) of the consultants. | Laboratory surveillance of rabies<br><br>Post-exposure prophylaxis of rabies                                                                                                                                       | 31 positive cases of human rabies                                                                                     | None of these patients received PEP with the exception of one who started PEP late, 10 days after the suspected bite.<br><br>Dog vaccination coverage in Madagascar was 10%                                                                                                                                                                                                         |
| 13<br>14<br>15<br>16<br>17<br>18<br>19<br>20                                           | Kubheka 2013<br><br>South Africa                                         | 3-year retrospective study     | 2 601 patients who were offered rabies PEP. The median age of the people bitten by dogs during the two years was 20 years (with a range from 1- 92 years). The majority (61.3%) were aged 5-29 years old.                                                                           | human rabies surveillance database the uptake of the rabies PEP and patients telephone contact.                                                                                                                    | An average annualized rabies attack rate of 136 rabies cases per 100 000 dog-bite injuries (7/5 139).<br><br>6/7 died | 83.7% [95% confidence interval (CI): 82.4-85.2] completed the PEP treatment.                                                                                                                                                                                                                                                                                                        |
| 21<br>22<br>23<br>24<br>25<br>26<br>27<br>28<br>29<br>30<br>31<br>32<br>33<br>34<br>35 | Sofeu 2018<br><br>Cameroon                                               | A one year retrospective study | A total of 1,402 animal exposures were reported in the West region of Cameroon.                                                                                                                                                                                                     | The surveillance network consisted of local, regional, and national health and veterinary authorities.<br><br>PEP and immunizations received prior to the current exposure; and the wound treatment were recorded. | Overall incidence rate of 6.1 exposures per 100,000 people.<br><br>One was confirmed positive for rabies              | Overall, at least 421 (60%) of the exposure victims considered to be at risk of rabies either did not receive any PEP or did not receive all PEP vaccinations.<br><br>Only 12.6% (117/925) of dogs were reported to have been vaccinated and only 14.4% of the animal exposure cases were followed-up with a visit by a veterinarian<br><br>No adverse events to PEP were reported. |
| 36<br>37<br>38<br>39<br>40<br>41<br>42<br>43<br>44<br>45<br>46<br>47                   | Mtema 2016<br><br>Tanzania                                               | A 5-year retrospective study   | Reports recorded bite patients seeking PEP (14,565 records, 49%), detailing visits of approximately 5,800 patients.                                                                                                                                                                 | Automated SMS (short message service, commonly known as a “text” message)                                                                                                                                          | Human rabies cases (42 reported) reflected issues with PEP supply.                                                    | Compliance with PEP regimens was significantly higher for patients following the implementation of automated reminders in comparison                                                                                                                                                                                                                                                |



|                             |                                                      |                                                                                             |                                                                                                                                                                 |                                                                                                                       |                                                                                                                                                                                                                                                                        |
|-----------------------------|------------------------------------------------------|---------------------------------------------------------------------------------------------|-----------------------------------------------------------------------------------------------------------------------------------------------------------------|-----------------------------------------------------------------------------------------------------------------------|------------------------------------------------------------------------------------------------------------------------------------------------------------------------------------------------------------------------------------------------------------------------|
|                             |                                                      |                                                                                             | reminders to patients due for further PEP doses.<br><br>Mass dog vaccinations<br><br>Mobile Phones As Surveillance Tools                                        | Incidence of bite patients seeking PEP declined substantially (>50%)                                                  | to patients attending clinics prior 7% of patients failed to obtain PEP.                                                                                                                                                                                               |
| Twabela 2016<br><br>DRC     | A 5-year retrospective study                         | A total of 5,053 attacks were recorded in the veterinary clinics.                           | Laboratory surveillance<br><br>PEP and immunizations                                                                                                            | 29 were found positive to rabies.                                                                                     | Rabies cases were three times higher in peri-urban zone than in urban zone.<br><br>It was observed that among the 5,053 attacks registered, 83 (1.6%) animals were killed and 15 (0.3%) disappeared just after attack without a follow-up or a veterinary observation. |
| Post exposure management    |                                                      |                                                                                             |                                                                                                                                                                 |                                                                                                                       |                                                                                                                                                                                                                                                                        |
| Osaghae 2011<br><br>Nigeria | A twelve-year retrospective study                    | 105 episodes of human and animal bites Recorded.<br><br>Comparators: N/A                    | Wound Management<br><br>Twenty (%) domestic dogs were vaccinated while 11(%) and six (%) were not vaccinated and without known vaccination status respectively. | A 10-year-old girl had rabies and died on the second day of admission.                                                | The anti-rabies vaccine was not administered to the children bitten by the vaccinated animals.                                                                                                                                                                         |
| Alabi 2014<br><br>Nigeria   | 3-year retrospective study and cross-sectional study | Only 195 (50.9%) of the 383 bite victims linked to a positive dog specimen could be traced. | A review of detailed profiles of dog bite victims managed in the clinics.                                                                                       | 54% of the victims took complete PEP. For those who did not complete PEP, 93% of the biting dogs were not vaccinated. | It has shown lack of enforcement of regulations for licensing of dogs and rabies vaccination.                                                                                                                                                                          |

|                          |                               |                                                                                                                                                                                   |                                                                                                                                                                                                                                                                                                 |                                                                                                                                                                                                                        |                                                                                                                                                                                                                                                                                                                         |
|--------------------------|-------------------------------|-----------------------------------------------------------------------------------------------------------------------------------------------------------------------------------|-------------------------------------------------------------------------------------------------------------------------------------------------------------------------------------------------------------------------------------------------------------------------------------------------|------------------------------------------------------------------------------------------------------------------------------------------------------------------------------------------------------------------------|-------------------------------------------------------------------------------------------------------------------------------------------------------------------------------------------------------------------------------------------------------------------------------------------------------------------------|
|                          |                               | About three quarters (141 (73%)) of the victims were aged <16 years.                                                                                                              |                                                                                                                                                                                                                                                                                                 |                                                                                                                                                                                                                        |                                                                                                                                                                                                                                                                                                                         |
| Muyila 2014<br>DRC       | A 8-month retrospective study | 21 cases were observed, rather three cases per month. There were 12 boys (57.1%) and 9 girls (42.9%). Biting animal was found to be dog in all cases (100%).                      | (9.5%) had their wounds treated and received an anti-rabies vaccine (ARV) after the bite incident. Two (9.5%) patients received rabies immunoglobulin (RIG).                                                                                                                                    | 100% of patients showed furious rabies manifestations<br><br>The case-fatality rate was 100%.                                                                                                                          | The study revealed the dogs were not immunized for rabies.                                                                                                                                                                                                                                                              |
| Frey 2013<br>Chad        | Cross-sectional study         | Of 86 people exposed to a suspected rabid animal. The median age was 18 years, with a range between.<br><br>2 months and 79 years.                                                | Post-exposure vaccination and wound cleaned.                                                                                                                                                                                                                                                    | Estimated annual incidence of bites from suspected rabid animals of 12.9/100 000 and an incidence of 0.7 human rabies deaths/ 100 000, resulting in 7 estimated deaths (95% confidence interval 4–10 deaths) per year. | 50% received post-exposure vaccination and a further 8% had their wound cleaned.                                                                                                                                                                                                                                        |
| Ogundare 2017<br>Nigeria | A retrospective study         | In all, 84 cases of dog bite injuries were managed constituting 0.89% of the total consultations. Most of the victims were aged 6-12 years (60.7%) and majority (71.4%) was boys. | Treatments received in the hospital ranged from washing the bite site with soap and water, to suturing of lacerations and wound dressing, analgesics, tetanus prophylaxis, anti-rabies vaccination (ARV), intravenous fluids and diazepam administration as well as antibiotics administration. | Six (7.1%) of cases had rabies and died.                                                                                                                                                                               | Although seventy-eight (92.9%) of the victims had post-exposure prophylaxis (PEP) with anti-rabies vaccine, only 45 (53.6%) of them were managed successfully and subsequently discharged after ensuring adequate wound healing and completion of the vaccination regimen. Thirty-three (39.3%) were lost to follow up. |
| Abubakar 2012<br>Nigeria | A 10-year                     | 81 victims of dog bite injuries. The majority, 45 (55.6%), were                                                                                                                   | Wound care                                                                                                                                                                                                                                                                                      | Two cases of clinical rabies were seen during the study period.                                                                                                                                                        | Prevalence of dog bite was highest, 41 (50.6%), during the hot season (April– June) and low, 14 (17.3%), during the wet season (July–October).                                                                                                                                                                          |

|                                                      |                                  |                                                                                                                             |                                                                                                                                                                                                                                                               |                                                                                                                                                                                                                                                                                                                                                                                         |                                                                                                                                                                                                                                                                                                                                                          |
|------------------------------------------------------|----------------------------------|-----------------------------------------------------------------------------------------------------------------------------|---------------------------------------------------------------------------------------------------------------------------------------------------------------------------------------------------------------------------------------------------------------|-----------------------------------------------------------------------------------------------------------------------------------------------------------------------------------------------------------------------------------------------------------------------------------------------------------------------------------------------------------------------------------------|----------------------------------------------------------------------------------------------------------------------------------------------------------------------------------------------------------------------------------------------------------------------------------------------------------------------------------------------------------|
|                                                      | retrospective study              | children less than 18 years while 36 (44.4%) were adults.                                                                   | PEP and the Immunization schedule                                                                                                                                                                                                                             |                                                                                                                                                                                                                                                                                                                                                                                         | None of the victims was previously immunized against rabies.                                                                                                                                                                                                                                                                                             |
| Kent 2012<br>South Africa                            | A 4-year retrospective study     | A total of 821 patients complaining of dog bite. Male children aged 6 - 10 years are most likely to present with dog bites. | Advice only<br>Wound management<br>Give vaccine<br>Give anti-rabies immunoglobulin                                                                                                                                                                            | Of the 821 bites, 642 (78%) were grade 3; 84 (10%) were grade 2; and 43 (5%) were grade 1. In 52 cases (7%), grade of bite was not recorded. Treatment with rabies vaccine was started in 90% of cases of grade 1 bites, 97% of grade 2 bites and 99% of grade 3 bites.<br><br>Immunoglobulin was administered for 53% of grade 1 bites, 84% of grade 2 bites and 82% of grade 3 bites. | Males present more frequently than females, and young males (ages 6 - 10) are most likely to present. This trend reverses after the age of 40 years, when females are more likely to present than males. We also showed that 99% of grade 3 bite patients are treated with rabies vaccine, but the rate of treatment with immunoglobulin is lower (82%). |
| Rabies Diseases Surveillance, Prevention and Control |                                  |                                                                                                                             |                                                                                                                                                                                                                                                               |                                                                                                                                                                                                                                                                                                                                                                                         |                                                                                                                                                                                                                                                                                                                                                          |
| Lushasi 2020<br>Tanzania                             | Multi-center retrospective study | 1,291 victims bite. The study was undertaken across 20 districts in 4 regions in Southern, Central, and Northern Tanzania.  | Integrated Bite Case Management (IBCM). We trained government staff to implement<br><br>IBCM, comprising risk assessments of bite patients by health workers, investigations by livestock field officers to diagnose rabid animals, and use of a mobile phone | Only 63 of these bite patients were referred to other facilities for PEP with 43 assessed as being suspect rabies exposures. Sixteen human deaths due to rabies were reported within the IBCM study districts.<br><br>Overall bite patient presentations corresponded to an                                                                                                             | Throughout the study regions, PEP was unavailable for 74 bite patients (5.7%) upon presentation to a health facility, during the period of IBCM implementation.                                                                                                                                                                                          |

|                              |                                                |                                                                                                                                                                                                                                                         |                                                                                                                                                                                                                                                                                                                                                                                                                                                       |                                                                                                                                                                                                                                                                      |                                                                                                                                                                                                                                                                                                                                |
|------------------------------|------------------------------------------------|---------------------------------------------------------------------------------------------------------------------------------------------------------------------------------------------------------------------------------------------------------|-------------------------------------------------------------------------------------------------------------------------------------------------------------------------------------------------------------------------------------------------------------------------------------------------------------------------------------------------------------------------------------------------------------------------------------------------------|----------------------------------------------------------------------------------------------------------------------------------------------------------------------------------------------------------------------------------------------------------------------|--------------------------------------------------------------------------------------------------------------------------------------------------------------------------------------------------------------------------------------------------------------------------------------------------------------------------------|
|                              |                                                |                                                                                                                                                                                                                                                         | application to support integration.                                                                                                                                                                                                                                                                                                                                                                                                                   | incidence of 17.4 bites per 100,000 persons per annum.                                                                                                                                                                                                               |                                                                                                                                                                                                                                                                                                                                |
| Changalucha 2019<br>Tanzania | 5-year retrospective and cross-sectional study | About 36% of patient presentations at health facilities were due to bites from probable rabid dogs (1,878/5,162 patients that sought care) as assessed through contact tracing, with the remainder from healthy animals or animals with unknown status. | Mobile phone-based surveillance records<br><br>PEP was supplied free-of-charge to hospitals<br><br>and selected outlying facilities in each district and training was provided to over 300 health workers in use of the updated Thai Red<br><br>Cross ID regimen (5-dose Essen IM regimen).<br><br>Qualitative interviews with stakeholders at different levels within the health system to characterize the logistics associated with PEP provision. | We detected an average of 75.6 and 19.3 probable rabies exposures per 100,000 persons per year.<br><br>Of 1005 individuals identified during contact tracing who received late and/or incomplete postexposure vaccination, 14 died showing clinical signs of rabies. | Upon seeking care a further 15% of probable rabies exposed persons did not obtain PEP due to shortages, cost barriers or misadvice.<br><br>Of those that initiated PEP, 46% did not complete the course. Decentralized and free PEP increased the probability that patients received PEP and reduced delays in initiating PEP. |
| Rajeev 2019<br>Madagascar    | One year retrospective study                   | 1019 patients reported to the anti-rabies medical centers (ARMC).                                                                                                                                                                                       | A combined strategy of mass dog vaccination, enhanced surveillance, and expanded access to PEP.                                                                                                                                                                                                                                                                                                                                                       | Annual incidence of 42–110 rabies exposures and 1–3 deaths per 100,000 persons annually. Extrapolating an annual burden of 282–745 human rabies deaths with current PEP provisioning averting 1499–3958 deaths each year.                                            | A high proportion of rabies-exposed persons from Moramanga sought (84%) and completed PEP (90% of those that initiated PEP).                                                                                                                                                                                                   |

|                                  |                                                                                         |                                                                                                                |                                                                                                                                                                                                                                                                                                                                              |                                                                                                                                                                                                                                                                                                                                                                                                                                                |                                                                                                                                                                                                                                                                                                                             |
|----------------------------------|-----------------------------------------------------------------------------------------|----------------------------------------------------------------------------------------------------------------|----------------------------------------------------------------------------------------------------------------------------------------------------------------------------------------------------------------------------------------------------------------------------------------------------------------------------------------------|------------------------------------------------------------------------------------------------------------------------------------------------------------------------------------------------------------------------------------------------------------------------------------------------------------------------------------------------------------------------------------------------------------------------------------------------|-----------------------------------------------------------------------------------------------------------------------------------------------------------------------------------------------------------------------------------------------------------------------------------------------------------------------------|
| <p>Diallo 2019<br/>Senegal</p>   | <p>A prospective cohort study was carried out from April 1, 2013 to March 31, 2014,</p> | <p>1036 patients sought a consultation at the Pasteur Institute of Dakar for suspicion of rabies exposure.</p> | <p>Post-exposure prophylaxis implementation (consists of injection of four intramuscular doses of a purified vero cell rabies vaccine).</p> <p>Dog rabies vaccination treatment (local treatment of injuries, antibiotics administration, and previous rabies vaccination), knowledge of rabies and attitudes in respect to animal bite.</p> | <p>No death was reported during the study period.</p> <p>Adverse events were reported after the first two doses by 6% of the patients (42/678) (including 5 patients who also received equine RIG at D0), and after the third dose, by 3% (16/493). Most of them were minor: headache</p> <p>(46.5%), fever (31%) and pain at the injection site (22%), and mostly (74%) occurred on the same day of the vaccine injection (up to 7 days).</p> | <p>Out of the patients receiving PEP, 162 (18%) patients received two doses only at D0, 185 (20.5%) three doses at D0 and D7 and 493 (54.5%) completed the full 4-dose schedule.</p>                                                                                                                                        |
| <p>Hampson 2008<br/>Tanzania</p> | <p>5-year retrospective study</p>                                                       | <p>1080 people were traced and interviewed who had been bitten by animals.</p>                                 | <p>Contact tracing was used to gather data on rabies exposures, post-exposure prophylaxis (PEP) delivered and deaths case reports from livestock offices and community based surveillance activities.</p>                                                                                                                                    | <p>Twenty-eight deaths from suspected rabies were recorded during the five-year period in the two districts, an average of 1.5/100,000 per year in Serengeti and 2.3 in Ngorongoro</p>                                                                                                                                                                                                                                                         | <p>Insufficient knowledge about rabies dangers and prevention, particularly prompt PEP, but also wound management, was the main cause of rabies deaths.</p> <p>Received PEP: 685 (71%)</p> <p>Attended hospital: 971 (85%)</p> <p>PEP dramatically reduced the risk of developing rabies (OR 17.33, 95% CI 6.39–60.83).</p> |

|                                    |                             |                                                                                                                                                                                                                         |                                                                                                                                                                                                                                                                                                                                                                                                                                                                                                                                                                                                  |                                                                 |                                                                                                                                                                                                                                                                                                                                                                         |
|------------------------------------|-----------------------------|-------------------------------------------------------------------------------------------------------------------------------------------------------------------------------------------------------------------------|--------------------------------------------------------------------------------------------------------------------------------------------------------------------------------------------------------------------------------------------------------------------------------------------------------------------------------------------------------------------------------------------------------------------------------------------------------------------------------------------------------------------------------------------------------------------------------------------------|-----------------------------------------------------------------|-------------------------------------------------------------------------------------------------------------------------------------------------------------------------------------------------------------------------------------------------------------------------------------------------------------------------------------------------------------------------|
| <p>Salomão 2017<br/>Mozambique</p> | <p>A case control study</p> | <p>819 cases of animal bites were registered, of which 64.6% (529/819) were from Maputo City.</p> <p>Same neighborhood close to the human rabies victim's house were used as controls (case: control ratio of 1:4).</p> | <p>Affixing posters in health units regarding treatment of animal bites and post-exposure prophylaxis.</p> <p>Delivery of additional quantities of anti-rabies vaccine to the Prophylaxis.</p> <p>Decentralization of post-exposure prophylaxis.</p> <p>Vaccination of dogs in the neighborhoods where human rabies cases had occurred.</p> <p>Mass vaccination campaign of dogs.</p> <p>Participation of private veterinary clinics in animal vaccination.</p> <p>Collection of stray dogs in selected neighborhoods.</p> <p>Community education regarding prevention and control measures.</p> | <p>A total of 14 cases of fatal rabies, Among them 12 died.</p> | <p>No rabies victim received full post-exposure vaccination</p> <p>Factors significantly associated with human rabies were: age &lt;15 years (p = 0.05), bite by stray dog (p = 0.002), deep wound (p = 0.02), bite in the head (p = 0.001), bite by unimmunized dog (p = 0.01), no use of soap and water (p = 0.001), and no post-exposure prophylaxis (p = 0.01).</p> |
|------------------------------------|-----------------------------|-------------------------------------------------------------------------------------------------------------------------------------------------------------------------------------------------------------------------|--------------------------------------------------------------------------------------------------------------------------------------------------------------------------------------------------------------------------------------------------------------------------------------------------------------------------------------------------------------------------------------------------------------------------------------------------------------------------------------------------------------------------------------------------------------------------------------------------|-----------------------------------------------------------------|-------------------------------------------------------------------------------------------------------------------------------------------------------------------------------------------------------------------------------------------------------------------------------------------------------------------------------------------------------------------------|

1  
2  
3  
4  
5  
6  
7  
8  
9  
10  
11  
12  
13  
14  
15  
16  
17  
18  
19  
20  
21  
22  
23  
24  
25  
26  
27  
28  
29  
30  
31  
32  
33  
34  
35  
36  
37  
38  
39  
40  
41  
42  
43  
44  
45  
46  
47

For peer review only

1  
2  
3  
4  
5  
6  
7  
8  
9  
10  
11  
12  
13  
14  
15  
16  
17  
18  
19  
20  
21  
22  
23  
24  
25  
26  
27  
28  
29  
30  
31  
32  
33  
34  
35  
36  
37  
38  
39  
40  
41  
42  
43  
44  
45  
46  
47  
48  
49  
50  
51  
52  
53  
54  
55  
56  
57  
58  
59  
60

For peer review only



1  
2  
3  
4  
5  
6  
7  
8  
9  
10  
11  
12  
13  
14  
15  
16  
17  
18  
19  
20  
21  
22  
23  
24  
25  
26  
27  
28  
29  
30  
31  
32  
33  
34  
35  
36  
37  
38  
39  
40  
41  
42  
43  
44  
45  
46  
47  
48  
49  
50  
51  
52  
53  
54  
55  
56  
57  
58  
59  
60

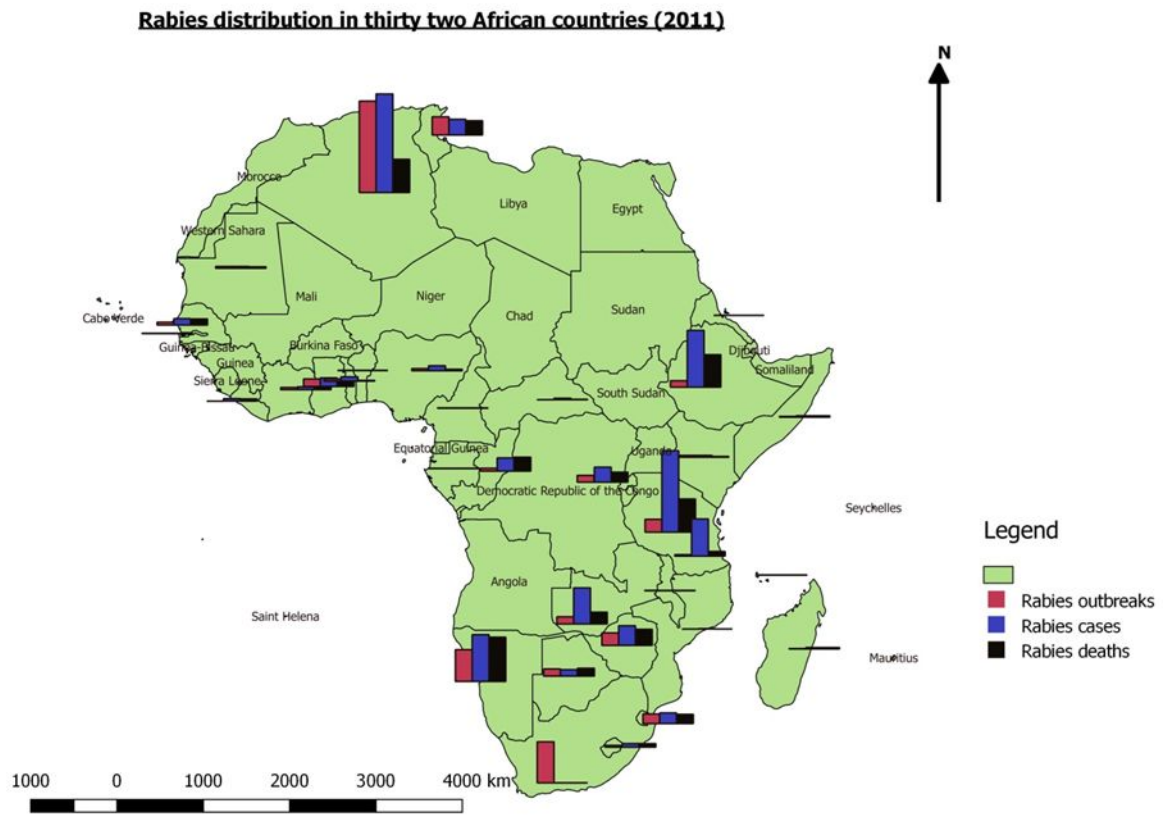

Figure 1: Human rabies distribution in thirty-two African countries (2011)

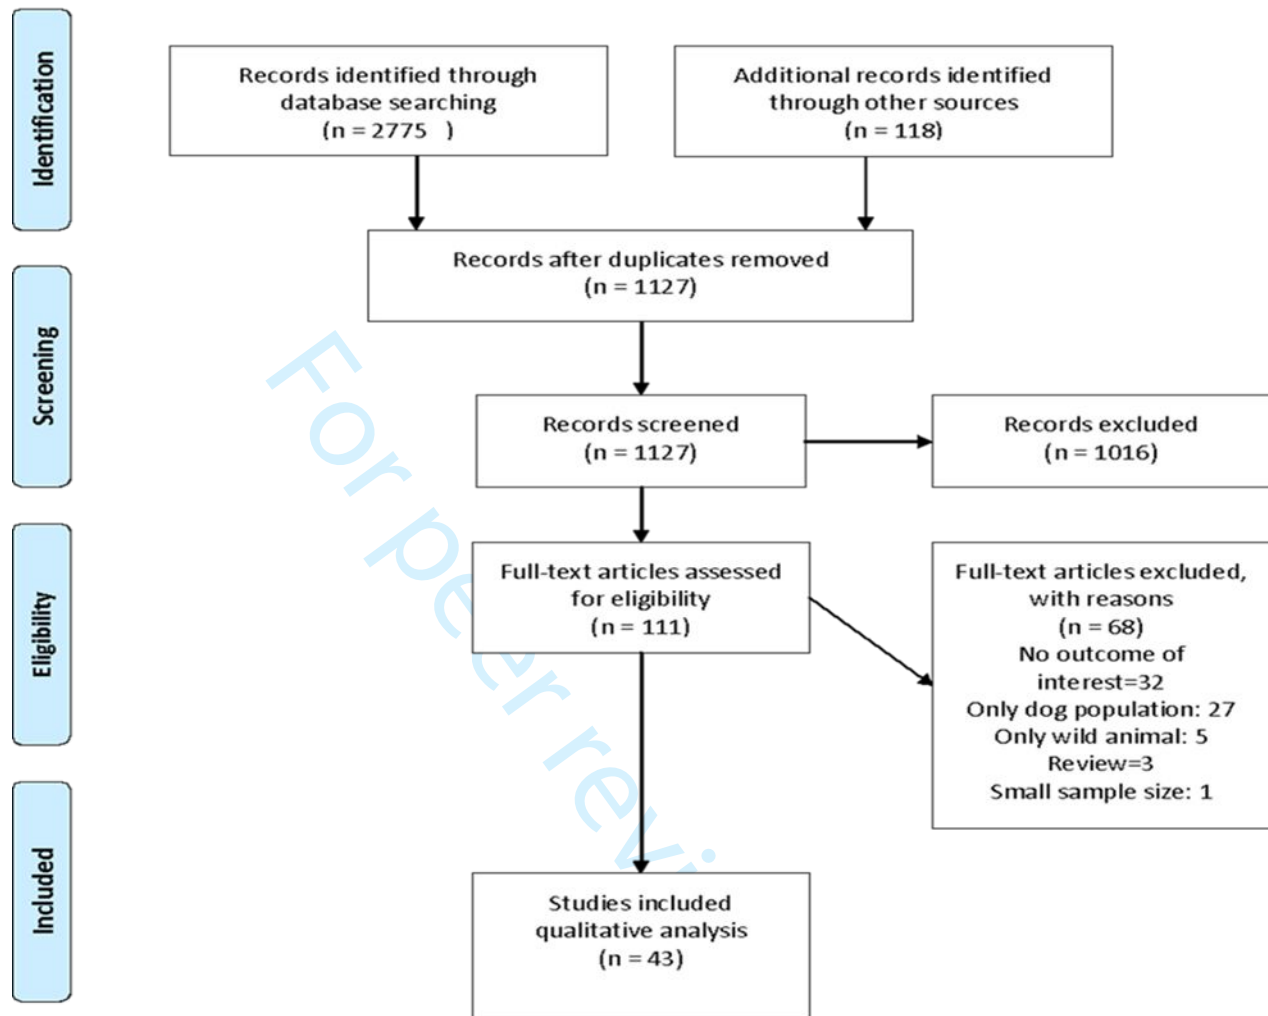

42 Figure 2: Flow diagram of human rabies mortality and morbidity associated with animal bites  
43 in Africa. Note From PRISMA: [www.prisma-statement.org](http://www.prisma-statement.org) [86]  
44  
45  
46  
47  
48  
49  
50  
51  
52  
53  
54  
55  
56  
57  
58  
59  
60

1  
2  
3  
4  
5  
6  
7  
8  
9  
10  
11  
12  
13  
14  
15  
16  
17  
18  
19  
20  
21  
22  
23  
24  
25  
26  
27  
28  
29  
30  
31  
32  
33  
34  
35  
36  
37  
38  
39  
40  
41  
42  
43  
44  
45  
46  
47  
48  
49  
50  
51  
52  
53  
54  
55  
56  
57  
58  
59  
60

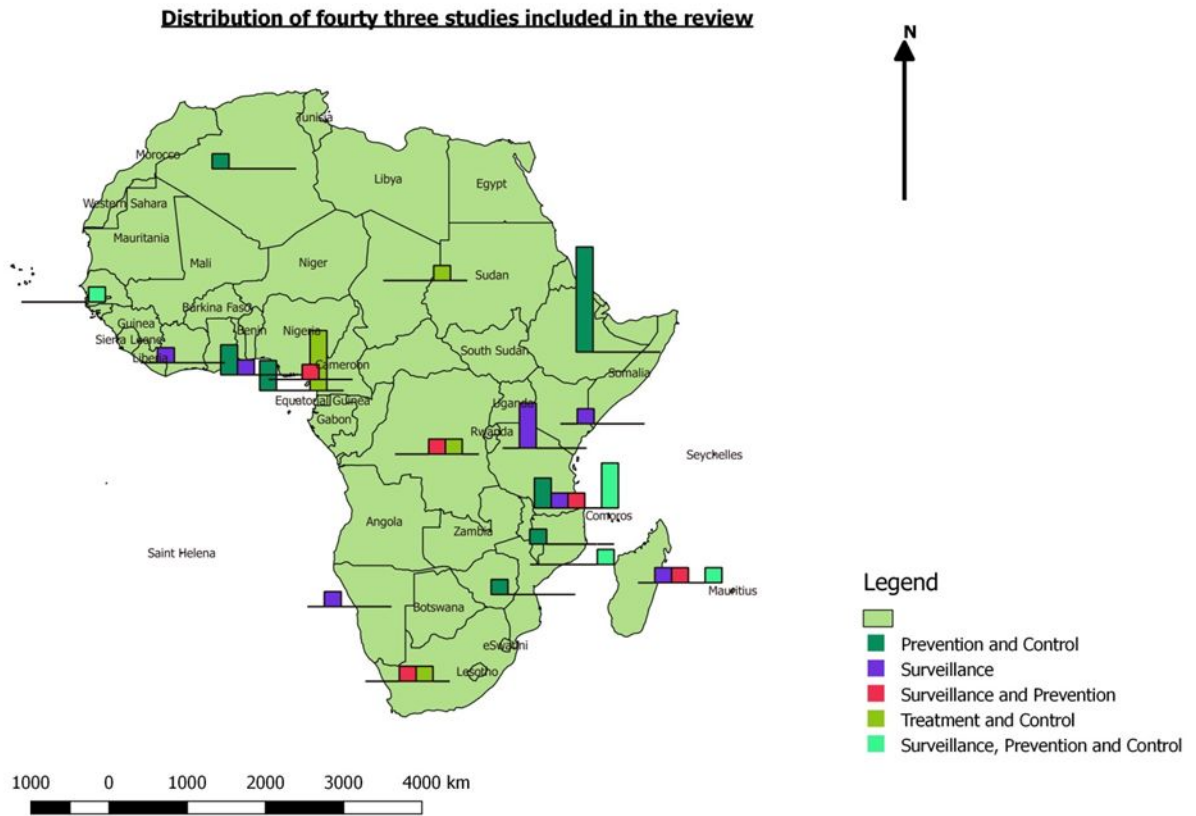

Figure 3: Distribution of forty-three studies in African countries.

## Supplementary material 1

### Search Strategy:

Database: Ovid MEDLINE(R) and Epub Ahead of Print, In-Process & Other Non-Indexed Citations, Daily and Versions(R) <1946 to May 25, 2020>

---

- 1 exp rabies/ or exp Rabies virus/ or rabies.mp.
- 2 africa\*.mp. or exp Africa/
- 3 (Algeria or Angola or Benin or Botswana or Burkina Faso or Burundi or Cameroon or Cape Verde or "Central African republic" or Chad or Comoros or Congo or "Democratic Republic of Congo" or DRC or Djibouti or Equatorial guinea or Egypt or Eritrea or Ethiopia or Gabon or Gambia or Ghana or Guinea or Bissau or Ivory coast or "Cote d ivoire" or Jamahiriya or Kenya or Lesotho or Liberia or Libya or Madagascar or Malawi or Mali or Mauritania or Mauritius or Mayotte or Morocco or Mozambique or Namibia or Niger or Nigeria or Principe or Reunion or Rhodesia or Rwanda or "Sao Tome" or Senegal or Seychelles or "Sierra Leone" or Somalia or "South Africa" or "St Helena" or Sudan or Swaziland or Tanzania or Togo or Tunisia or Uganda or Zaire or Zambia or Zimbabwe or "Central Africa" or "West Africa" or "East Africa" or "Southern Africa" or South Africa).mp.
- 4 2 or 3
- 5 1 and 4
- 6 mortality/ or mortality.mp.
- 7 fatality.mp.
- 8 morbidity.mp. or Morbidity/
- 9 surveillance.mp. or Population Surveillance/
- 10 (vaccine or vaccines).mp. or Vaccination/
- 11 6 or 7 or 8 or 9 or 10
- 12 Rabies Vaccines/
- 13 5 and 11
- 14 4 and 12

1  
2  
3  
4  
5  
6  
7  
8  
9  
10  
11  
12  
13  
14  
15  
16  
17  
18  
19  
20  
21  
22  
23  
24  
25  
26  
27  
28  
29  
30  
31  
32  
33  
34  
35  
36  
37  
38  
39  
40  
41  
42  
43  
44  
45  
46  
47  
48  
49  
50  
51  
52  
53  
54  
55  
56  
57  
58  
59  
60

15 13 or 14  
16 limit 15 to english language

For peer review only

## Preferred Reporting Items for Systematic reviews and Meta-Analyses extension for Scoping Reviews (PRISMA-ScR) Checklist

| SECTION                                               | ITEM | PRISMA-ScR CHECKLIST ITEM                                                                                                                                                                                                                                                                                  | REPORTED ON PAGE #        |
|-------------------------------------------------------|------|------------------------------------------------------------------------------------------------------------------------------------------------------------------------------------------------------------------------------------------------------------------------------------------------------------|---------------------------|
| <b>TITLE</b>                                          |      |                                                                                                                                                                                                                                                                                                            |                           |
| Title                                                 | 1    | Identify the report as a scoping review.                                                                                                                                                                                                                                                                   | Page 1; Lines 1-2         |
| <b>ABSTRACT</b>                                       |      |                                                                                                                                                                                                                                                                                                            |                           |
| Structured summary                                    | 2    | Provide a structured summary that includes (as applicable): background, objectives, eligibility criteria, sources of evidence, charting methods, results, and conclusions that relate to the review questions and objectives.                                                                              | Page 3-4; Lines 32-54     |
| <b>INTRODUCTION</b>                                   |      |                                                                                                                                                                                                                                                                                                            |                           |
| Rationale                                             | 3    | Describe the rationale for the review in the context of what is already known. Explain why the review questions/objectives lend themselves to a scoping review approach.                                                                                                                                   | Page 6-12; Lines 76-226   |
| Objectives                                            | 4    | Provide an explicit statement of the questions and objectives being addressed with reference to their key elements (e.g., population or participants, concepts, and context) or other relevant key elements used to conceptualize the review questions and/or objectives.                                  | Page 12; Lines 218-226    |
| <b>METHODS</b>                                        |      |                                                                                                                                                                                                                                                                                                            |                           |
| Protocol and registration                             | 5    | Indicate whether a review protocol exists; state if and where it can be accessed (e.g., a Web address); and if available, provide registration information, including the registration number.                                                                                                             | Not applicable            |
| Eligibility criteria                                  | 6    | Specify characteristics of the sources of evidence used as eligibility criteria (e.g., years considered, language, and publication status), and provide a rationale.                                                                                                                                       | Page 13; Lines 232-238    |
| Information sources*                                  | 7    | Describe all information sources in the search (e.g., databases with dates of coverage and contact with authors to identify additional sources), as well as the date the most recent search was executed.                                                                                                  | Page 13; Lines 239-242    |
| Search                                                | 8    | Present the full electronic search strategy for at least 1 database, including any limits used, such that it could be repeated.                                                                                                                                                                            | Page 13; Line 243         |
| Selection of sources of evidence†                     | 9    | State the process for selecting sources of evidence (i.e., screening and eligibility) included in the scoping review.                                                                                                                                                                                      | Page 13; Lines 244-247    |
| Data charting process‡                                | 10   | Describe the methods of charting data from the included sources of evidence (e.g., calibrated forms or forms that have been tested by the team before their use, and whether data charting was done independently or in duplicate) and any processes for obtaining and confirming data from investigators. | Page 13-14; Lines 248-266 |
| Data items                                            | 11   | List and define all variables for which data were sought and any assumptions and simplifications made.                                                                                                                                                                                                     | Page 14; Lines 267-276    |
| Critical appraisal of individual sources of evidence§ | 12   | If done, provide a rationale for conducting a critical appraisal of included sources of evidence; describe                                                                                                                                                                                                 | Page 15; Lines 277-279    |

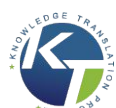

| SECTION                                       | ITEM | PRISMA-ScR CHECKLIST ITEM                                                                                                                                                                       | REPORTED ON PAGE #               |
|-----------------------------------------------|------|-------------------------------------------------------------------------------------------------------------------------------------------------------------------------------------------------|----------------------------------|
|                                               |      | the methods used and how this information was used in any data synthesis (if appropriate).                                                                                                      |                                  |
| Synthesis of results                          | 13   | Describe the methods of handling and summarizing the data that were charted.                                                                                                                    | Page 15; Lines 280-286           |
| <b>RESULTS</b>                                |      |                                                                                                                                                                                                 |                                  |
| Selection of sources of evidence              | 14   | Give numbers of sources of evidence screened, assessed for eligibility, and included in the review, with reasons for exclusions at each stage, ideally using a flow diagram.                    | Page 15; Line 293                |
| Characteristics of sources of evidence        | 15   | For each source of evidence, present characteristics for which data were charted and provide the citations.                                                                                     | Page 16; Lines 295-309           |
| Critical appraisal within sources of evidence | 16   | If done, present data on critical appraisal of included sources of evidence (see item 12).                                                                                                      | Not applicable                   |
| Results of individual sources of evidence     | 17   | For each included source of evidence, present the relevant data that were charted that relate to the review questions and objectives.                                                           | page 62-75                       |
| Synthesis of results                          | 18   | Summarize and/or present the charting results as they relate to the review questions and objectives.                                                                                            | Page 17-32; Lines 328-542        |
| <b>DISCUSSION</b>                             |      |                                                                                                                                                                                                 |                                  |
| Summary of evidence                           | 19   | Summarize the main results (including an overview of concepts, themes, and types of evidence available), link to the review questions and objectives, and consider the relevance to key groups. | Page 33-37; Lines 546-603        |
| Limitations                                   | 20   | Discuss the limitations of the scoping review process.                                                                                                                                          | Page 5; 33; Lines 66-74; 554-559 |
| Conclusions                                   | 21   | Provide a general interpretation of the results with respect to the review questions and objectives, as well as potential implications and/or next steps.                                       | Page 39-40; Lines 684-714        |
| <b>FUNDING</b>                                |      |                                                                                                                                                                                                 |                                  |
| Funding                                       | 22   | Describe sources of funding for the included sources of evidence, as well as sources of funding for the scoping review. Describe the role of the funders of the scoping review.                 | Page 41; Line 731                |

JB1 = Joanna Briggs Institute; PRISMA-ScR = Preferred Reporting Items for Systematic reviews and Meta-Analyses extension for Scoping Reviews.

\* Where *sources of evidence* (see second footnote) are compiled from, such as bibliographic databases, social media platforms, and Web sites.

† A more inclusive/heterogeneous term used to account for the different types of evidence or data sources (e.g., quantitative and/or qualitative research, expert opinion, and policy documents) that may be eligible in a scoping review as opposed to only studies. This is not to be confused with *information sources* (see first footnote).

‡ The frameworks by Arksey and O'Malley (6) and Levac and colleagues (7) and the JBI guidance (4, 5) refer to the process of data extraction in a scoping review as data charting.

§ The process of systematically examining research evidence to assess its validity, results, and relevance before using it to inform a decision. This term is used for items 12 and 19 instead of "risk of bias" (which is more applicable to systematic reviews of interventions) to include and acknowledge the various sources of evidence that may be used in a scoping review (e.g., quantitative and/or qualitative research, expert opinion, and policy document).

From: Tricco AC, Lillie E, Zarin W, O'Brien KK, Colquhoun H, Levac D, et al. PRISMA Extension for Scoping Reviews (PRISMA-ScR): Checklist and Explanation. *Ann Intern Med.* 2018;169:467-473. doi: 10.7326/M18-0850.

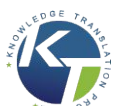

St. Michael's

Inspired Care.  
Inspiring Science.

For peer review only - <http://bmjopen.bmj.com/site/about/guidelines.xhtml>

# BMJ Open

## Rabies mortality and morbidity associated with animal bites in Africa: A case for Integrated Rabies Diseases Surveillance, Prevention, and Control - A Scoping review

|                                 |                                                                                                                                                                                                                                                                                                                                                                                                                                                                                                                                                                                                                                                                                                                                                                                                                                                                                                                                                                                                                                                                                                                                                    |
|---------------------------------|----------------------------------------------------------------------------------------------------------------------------------------------------------------------------------------------------------------------------------------------------------------------------------------------------------------------------------------------------------------------------------------------------------------------------------------------------------------------------------------------------------------------------------------------------------------------------------------------------------------------------------------------------------------------------------------------------------------------------------------------------------------------------------------------------------------------------------------------------------------------------------------------------------------------------------------------------------------------------------------------------------------------------------------------------------------------------------------------------------------------------------------------------|
| Journal:                        | <i>BMJ Open</i>                                                                                                                                                                                                                                                                                                                                                                                                                                                                                                                                                                                                                                                                                                                                                                                                                                                                                                                                                                                                                                                                                                                                    |
| Manuscript ID                   | bmjopen-2020-048551.R1                                                                                                                                                                                                                                                                                                                                                                                                                                                                                                                                                                                                                                                                                                                                                                                                                                                                                                                                                                                                                                                                                                                             |
| Article Type:                   | Original research                                                                                                                                                                                                                                                                                                                                                                                                                                                                                                                                                                                                                                                                                                                                                                                                                                                                                                                                                                                                                                                                                                                                  |
| Date Submitted by the Author:   | 18-Jun-2021                                                                                                                                                                                                                                                                                                                                                                                                                                                                                                                                                                                                                                                                                                                                                                                                                                                                                                                                                                                                                                                                                                                                        |
| Complete List of Authors:       | Nyasulu, P; Stellenbosch University, Global Health<br>Weyer, Jacqueline ; NICD, Centre for Emerging Zoonosis and Parasitic Diseases<br>Tschopp, Rea; Swiss Tropical and Public Health Institute; University of Basel<br>Mihret, Adane; Armauer Hansen Research Institute<br>Aseffa, Abraham; Armauer Hansen Research Institute,<br>Nuvor, Samuel; University of Cape Coast, Department of Microbiology and Immunology<br>Tamuzi, Jacques ; Stellenbosch University Faculty of Medicine and Health Sciences, Epidemiology<br>Nyakarahuka, Like; Makerere University College of Health Sciences<br>Helegbe , Gideon; University for Development Studies School of Medicine and Health Sciences<br>Ntinginya, Nyanda; 6. National Institute of Medical Research-Mbeya Medical Research Centre<br>Gebreyesus, Melaku ; Lilongwe University of Agriculture and Natural Resources<br>Doumbia, Seydou; Université des Sciences, Techniques et Technologiques de Bamako, Faculté de Medecine et d'OdontoStomatologie<br>Busse, Reinhard; Technische Universität Berlin, Health Care Management<br>Drosten, Christian ; Charité Universitätsmedizin Berlin, |
| <b>Primary Subject Heading</b>: | Infectious diseases                                                                                                                                                                                                                                                                                                                                                                                                                                                                                                                                                                                                                                                                                                                                                                                                                                                                                                                                                                                                                                                                                                                                |
| Secondary Subject Heading:      | Epidemiology, Public health, Global health, Evidence based practice                                                                                                                                                                                                                                                                                                                                                                                                                                                                                                                                                                                                                                                                                                                                                                                                                                                                                                                                                                                                                                                                                |
| Keywords:                       | EPIDEMIOLOGY, INFECTIOUS DISEASES, PUBLIC HEALTH                                                                                                                                                                                                                                                                                                                                                                                                                                                                                                                                                                                                                                                                                                                                                                                                                                                                                                                                                                                                                                                                                                   |
|                                 |                                                                                                                                                                                                                                                                                                                                                                                                                                                                                                                                                                                                                                                                                                                                                                                                                                                                                                                                                                                                                                                                                                                                                    |

SCHOLARONE™  
Manuscripts





I, the Submitting Author has the right to grant and does grant on behalf of all authors of the Work (as defined in the below author licence), an exclusive licence and/or a non-exclusive licence for contributions from authors who are: i) UK Crown employees; ii) where BMJ has agreed a CC-BY licence shall apply, and/or iii) in accordance with the terms applicable for US Federal Government officers or employees acting as part of their official duties; on a worldwide, perpetual, irrevocable, royalty-free basis to BMJ Publishing Group Ltd ("BMJ") its licensees and where the relevant Journal is co-owned by BMJ to the co-owners of the Journal, to publish the Work in this journal and any other BMJ products and to exploit all rights, as set out in our [licence](#).

The Submitting Author accepts and understands that any supply made under these terms is made by BMJ to the Submitting Author unless you are acting as an employee on behalf of your employer or a postgraduate student of an affiliated institution which is paying any applicable article publishing charge ("APC") for Open Access articles. Where the Submitting Author wishes to make the Work available on an Open Access basis (and intends to pay the relevant APC), the terms of reuse of such Open Access shall be governed by a Creative Commons licence – details of these licences and which [Creative Commons](#) licence will apply to this Work are set out in our licence referred to above.

Other than as permitted in any relevant BMJ Author's Self Archiving Policies, I confirm this Work has not been accepted for publication elsewhere, is not being considered for publication elsewhere and does not duplicate material already published. I confirm all authors consent to publication of this Work and authorise the granting of this licence.

1  
2  
3 **Rabies mortality and morbidity associated with animal bites in Africa: A case for**  
4  
5 **Integrated Rabies Diseases Surveillance, Prevention and Control - A Scoping review**  
6  
7  
8  
9

10 Authors: Peter Suwirakwenda Nyasulu<sup>1\*</sup>, Jacqueline Weyer<sup>2</sup>, Rea Tschopp<sup>3,4</sup>, Adane Mihret<sup>4</sup>,  
11 Abraham Aseffa<sup>4</sup>, Samuel Victor Nuvor<sup>5</sup>, Jacques Lukenze Tamuzi<sup>1</sup>, Like Nyakarahuka<sup>6</sup>, Gideon  
12 Khofi Helegbe<sup>7</sup>, Nyanda Elias Ntinginya<sup>8</sup>, Melaku Tefera Gebreyesus<sup>9</sup>, Seydou Doumbia<sup>10</sup>,  
13 Reinhard Busse<sup>11</sup>, Christian Drosten<sup>11</sup>.  
14  
15  
16  
17  
18  
19  
20  
21  
22

23 **Affiliation**  
24

25 <sup>1</sup>Division of Epidemiology & Biostatistics, Department of Global Health, Faculty of Medicine &  
26 Health Sciences, Stellenbosch University, Cape Town, South Africa  
27  
28

29 <sup>2</sup>Centre for Emerging Zoonosis and Parasitic Diseases, NICD, NHLS, Johannesburg, South Africa  
30 and Department for Medical Virology, University of Pretoria, Pretoria, South Africa  
31  
32

33 <sup>3</sup>Department of Epidemiology and Public Health, Swiss TPH, University of Basel, Switzerland  
34  
35

36 <sup>4</sup>The Armauer Hansen Research Institute (AHRI), Addis Ababa, Ethiopia.  
37  
38

39 <sup>5</sup>Department of Microbiology and Immunology, School of Medical Sciences, University of Cape  
40 Coast, Cape Coast, Ghana  
41  
42  
43

44 <sup>6</sup>Department of Biosecurity, Ecosystems and Veterinary Public Health, Makerere University,  
45 Kampala, Uganda  
46  
47  
48

49 <sup>7</sup>Department Biochemistry and Molecular Medicine, School of Medicine and Health Sciences,  
50 University for Development Studies, Tamale, Ghana  
51  
52  
53  
54  
55  
56  
57  
58  
59  
60

1  
2  
3 <sup>8</sup>Mbeya Medical Research Centre, National Institute of Medical Research, Tanzania  
4  
5

6 <sup>9</sup>Department of Veterinary Medicine, Lilongwe University of Agriculture and Natural Resources,  
7  
8 Lilongwe, Malawi  
9  
10

11 <sup>10</sup>Department of Public Health, Faculty of Medicine, University of Bamako, Mali  
12  
13

14 <sup>11</sup>Institute of Virology, Charité Global Health, Charité - Universitätsmedizin Berlin, Campus  
15  
16 Charité Mitte, Germany  
17  
18  
19  
20  
21  
22

23 **\*Corresponding Author:** Peter S Nyasulu, Division of Epidemiology, Faculty of Medicine and  
24  
25 Health Sciences, Stellenbosch University, Cape Town, South Africa. Email: [pnyasulu@sun.ac.za](mailto:pnyasulu@sun.ac.za)  
26  
27  
28  
29  
30  
31  
32  
33  
34  
35  
36  
37  
38  
39  
40  
41  
42  
43  
44  
45  
46  
47  
48  
49  
50  
51  
52  
53  
54  
55  
56  
57  
58  
59  
60

## Abstract

### Objective

The objective of this scoping review was to map the current situation and available evidence and gaps on rabies morbidity, mortality, integrated rabies surveillance programs, and existing prevention and control strategies in Africa.

### Methods

We conducted a systematic scoping review following the Joanna Briggs methodology and PRISMA-ScR checklist. Medline, EMBASE, Cinahl (EBSCOHost), Scopus, Web of Science and rabies web conferences were used to search for peer-reviewed publications between January 1946-May 2020. Two researchers reviewed the studies and extracted data based on author (year) and region, study design and data collection duration, Participants / Comparators, Interventions and Control Conditions / Exposures, outcomes (rabies mortality and morbidity) and Key Findings / Gaps / Challenges. The results were reported narratively using Arksey methodological framework.

### Results

Electronic search yielded 2775 records, of which 43 studies were included. A total of 543,714 bite victims were censored through the included studies. Most of the victims were less than 15 years of age. The studies included, rabies morbidity (21) and mortality (15) fluctuating in space and time across Africa depending on countries rabies prevention and control practices (16). Others were surveillance (nine studies), surveillance and prevention (five studies), management and control (seven studies) and surveillance, prevention and control (six studies). We found challenges in

1  
2  
3 rabies reporting, existing dog vaccination programs and post-exposure prophylaxis availability or  
4  
5 compliance.  
6  
7

## 8 9 **Conclusion**

10  
11  
12 This study found challenges for dog rabies control and elimination in Africa and the need for a  
13  
14 policy to drive the goal of zero dog-transmitted human rabies by 2030.  
15  
16

17  
18 *This is an open access article distributed in accordance with the Creative Commons Attribution*  
19 *Non Commercial (CC BY-NC 4.0) license, which permits others to distribute, remix, adapt, build*  
20 *upon this work non-commercially, and license their derivative works on different terms, provided*  
21 *the original work is properly cited, appropriate credit is given, any changes made indicated, and*  
22 *the use is non-commercial. See <http://creativecommons.org/licenses/by-nc/4.0/>*  
23  
24  
25

26  
27 **Key words:** One-Health; rabies; mortality; morbidity; surveillance; zoonosis; neglected tropical  
28  
29 disease; Africa  
30  
31  
32  
33  
34  
35  
36  
37  
38  
39  
40  
41  
42  
43  
44  
45  
46  
47  
48  
49  
50  
51  
52  
53  
54  
55  
56  
57  
58  
59  
60

### Strengths and limitations of this study

- We conducted an extensive search of published and grey literature to identify studies to include in the scoping review
- Pulling together data from both published and grey literature from the Ministries of Health gave us an opportunity to understand the breadth of rabies epidemiology and how surveillance, prevention and control would be a critical tool in implementing effective control of rabies across Africa
- We conducted screening of identified articles and extraction of data in duplicate
- We reported the results narratively as it was not possible to combine data from different studies conducted using different study designs, and different population groups.

view only

## 1. Background

The natural history of rabies disease in Africa is not well known, but it is well accepted that the disease must have been present in northern Africa for hundreds of years, particularly as an urban dog disease and also associated with cycles in the Middle East [1]. European colonization influenced the spread of dog rabies in Western and Central Africa [2]. In many sub-Saharan African countries, rabies has become epizootic only in the nineteenth and twentieth centuries involved domestic dogs and free-ranging wildlife species [1-3].

More than 59 000 people die of rabies worldwide every year [4-5], 99% of them in African and Asian countries where dog rabies is endemic [4, 6-10]. Due to the lack of laboratory confirmation, sporadic epidemiologic surveillance, and unreported clinical cases in developing countries, current mortality estimates almost certainly under-represent the true incidence of human rabies deaths [4, 8-10]. Rabies is responsible for an estimated 21,000-25,000 death annually in Africa [4, 11-12]. Figure 1 shows a map illustrating rabies distribution in thirty-two African countries considering rabies outbreaks in animals, cases and deaths in humans [13]. In 2011, a total of 33 African countries reported 1,607 outbreaks of rabies, 2,779 cases and 1,524 deaths [13]. Data shows that rabies accounts for 7.2% of all animal disease outbreaks reported making it the disease with the highest number of outbreak reports in Africa in 2011 [13]. Algeria, Namibia, Eswatini (former Swaziland), Tunisia, Uganda, Zambia and Zimbabwe reported high morbidity and mortality with 563 cases (33.9% deaths), 269 (94% deaths), 62 cases (88.7% deaths), 91 cases (90% deaths), 466 cases (40.9%), 207 cases (32.8% deaths) and 114 cases (80.7% deaths) respectively [13].

Dog rabies predominates throughout most of Africa; the domestic dog is the principal reservoir host as well as the most important source of infection for people [14]. In addition, there are many

1  
2  
3 other lyssaviruses (also referred to as rabies-related viruses) reported from African countries. Most  
4  
5 of these rabies-related viruses have been associated with obscure hosts including specific bat  
6  
7 species and shrews, partly attribute to the difficulty in bio-surveillance of these viruses. RABV  
8  
9 however, spreads in terrestrial mammalian hosts in Africa and has not been associated with bat  
10  
11 infections as it is the case in the Americas. While all mammals (domestic and wild) are susceptible  
12  
13 to RABV infection, some are able to retain those virus variants adapted to their species whilst  
14  
15 others are only reported as dead-end hosts [15]. Rabies has been reported in both domesticated  
16  
17 species and wildlife. These are sometimes diagnosed with rabies virus infection in Zambia, South  
18  
19 Africa, Ethiopia, Kenya, Tanzania, Zimbabwe and Egypt [15-21].  
20  
21  
22  
23  
24

25 Most reported cases of rabies in wild carnivorous species included yellow mongoose (*Cynictis*  
26  
27 *penicillata*) and bat-eared fox (*Otocyon megalotis*) [22] as well as critically endangered wild dogs  
28  
29 (*Lycaon pictus*) [23-26]. In Ethiopia, rabies outbreaks were described in the endangered Ethiopian  
30  
31 wolf (*Canis Simensis*) population [27-28]. In 2014 and 2015, RABV infection was also observed  
32  
33 in two wild dogs and a spotted hyaena (*Crocuta crocuta*) in the Madikwe Game Reserve, North  
34  
35 West Province of South Africa, in Ethiopia and in Nigeria [21,26,29], monkeys and jackals (*Canis*  
36  
37 *adustus* and *Canis mesomelas*) [16,17, 20-21]. The review of twenty studies across Africa has  
38  
39 revealed that bite victims account for 91.9% (48092 dog bites), cat bite for 2.9%, jackal bite for  
40  
41 0.8% and 4.41% others (monkey, donkey, horse, rat, pig, rabbit, Honey badger, kudu, goat, cattle,  
42  
43 eland and hyena) [30-49].  
44  
45  
46  
47  
48

49 Mass vaccination of dogs as a key component of national rabies elimination programs has been  
50  
51 successful in eliminating dog-transmitted rabies in Europe, North and Latin America, and Japan  
52  
53 [50-52]. By far, the most significant public health threat comes from RABV, and over 99% of all  
54  
55  
56  
57  
58  
59  
60



1  
2  
3 globally reported human cases are caused by exposure to unvaccinated dogs infected with canine  
4  
5 RABV variant, mostly in Asia and Africa [53].  
6  
7

8  
9 In most of Africa, and specifically western and central African countries, notification of rabies  
10  
11 disease is not mandatory, so epidemiological data are scarce [54]. Human rabies could be  
12  
13 prevented by the immediate administration of post-exposure prophylaxis (PEP) following  
14  
15 exposure to rabid animals [5, 46]. However, people in low-income countries often do not receive  
16  
17 these life-saving treatments because either PEP treatment is costly and not readily available, or  
18  
19 because of lack of rabies awareness, people might not go to hospital for treatment [5, 9, 55]. The  
20  
21 lack of effective educational outreach at community level had led to gaps in knowledge as to the  
22  
23 best way to avoid animal bites and administer first aid following bites or other potential rabies  
24  
25 exposures [56]. A recent study has shown considerable in-country variability in the availability of  
26  
27 rabies vaccines and immunoglobulins vaccine supply system, administration route (IM versus SC),  
28  
29 cost of vaccine and rabies immunoglobulin (RIG). In a global survey conducted in rabies endemic  
30  
31 countries, 49 of the 54 African countries were rated as moderate to high risk for human rabies,  
32  
33 whilst 16 of the 23 countries that responded to the survey had inadequate surveillance systems [12,  
34  
35  
36  
37  
38  
39 57].  
40  
41

42 One major barrier is the difficulty of consistently achieving the required coverage of 70% of the  
43  
44 dog population across the hard-to-reach landscapes that characterize much of sub-Saharan Africa  
45  
46 [58-60]. Reviewing dog vaccination coverage in African countries, only South Africa, Tanzania,  
47  
48 Algeria, Morocco and Egypt had the dog vaccination coverage of 63%, 37.24%, 23.7%, 25% and  
49  
50 23.7% respectively [61,62]. In all other African countries dog vaccination coverage was below  
51  
52 18% with further below 5% in some cases [61]. The analysis of the above data and the  
53  
54  
55  
56  
57  
58  
59  
60

1  
2  
3 consideration of the framework for the elimination of dog rabies suggested by Wallace 2017 and  
4 others stipulated the existing coverage of dog rabies vaccination, was directly associated with the  
5 number of years it would take to achieve rabies elimination [63]. Theoretically, Global Dog Rabies  
6 Elimination Route (GDREP) consisting of a 13-year timeframe would be ample time for even the  
7 least developed rabies prevention systems to achieve elimination by 2030 if completely committed  
8 to this achievement [63]. This system divided countries into three categories: (1) Phase I:  
9 preparation (dog vaccination > 18%), (2) Phase II: vaccination of dogs (dog vaccination: < 18%  
10 and > 70%) and (3) Phase III: 70% continued vaccination of dogs. African countries have been  
11 categorized into phase I, II, III but with no data on dog vaccination [64]. The available data indicate  
12 that most African countries were still at the preparation phase since “zero rabies by 2020” was  
13 initiated five years ago. Although the feasibility of reaching 70% dog vaccination coverage has  
14 been shown through pilot projects in a wide range of settings. African countries still struggle to  
15 achieve a 70% yearly dog vaccination rate [10, 14]. In Africa, dog mass vaccination systems have  
16 demonstrated some effectiveness as proof of principle in countries such as South Africa [ 50-65],  
17 Tanzania [50, 66-68], Malawi [50,69] and Chad [ 55, 70-72].

18  
19  
20  
21  
22  
23  
24  
25  
26  
27  
28  
29  
30  
31  
32  
33  
34  
35  
36  
37  
38  
39 Inadequate education for veterinarians and physicians, insufficient resources for proper  
40 confirmatory diagnosis and risk assessment, and the lack of effective communication channels  
41 between ministries of health and agriculture frequently have led to failures of prophylactic  
42 intervention, even in regions where vaccines and immunoglobulins were available [56]. A recent  
43 study conducted in Africa and Asia revealed that rabies immunoglobulins were found to be less  
44 available than the vaccine, with access restricted in almost two-thirds of the countries surveyed  
45 [73]. Eleven (11) African countries had comprehensive access to RIG. Of the seven countries with  
46 broad access to vaccines, 6 of them had a national rabies prevention program or policy. Two of  
47  
48  
49  
50  
51  
52  
53  
54  
55  
56  
57  
58  
59  
60

1  
2  
3 the countries had only a monitoring program / strategy in place [73]. This is worrisome as it  
4  
5 exposes a huge absence of surveillance and prevention policies in most African countries. The  
6  
7 absence of a robust monitoring process is mostly attributed to the lack of rabies in national  
8  
9 communicable disease plans and reporting systems at national level in Africa [74]. Therefore,  
10  
11 widespread underreporting is likely to occur in many affected countries due to lack of health  
12  
13 information, civil registration and vital statistical systems, and inaccessibility of clinical care and  
14  
15 diagnostic confirmation [74] as symptoms of the disease may be non-specific and similar to other  
16  
17 encephalitic infections. Even where data exist in Africa, the lack of communication and exchange  
18  
19 of data between the animal and human health sectors also hinders the collection, storage and  
20  
21 reporting of coherent data to international data bases [74]. The World Health Organization (WHO)  
22  
23 meeting in Geneva in 2018 on "Moving Progress towards Rabies Elimination" pointed out that  
24  
25 political engagement is a key factor with governments providing leadership role in the coordination  
26  
27 of elimination strategies [12]. The global collection of data on deaths from any neglected disease  
28  
29 is a huge challenge, and early attempts to collate data for human deaths from canine rabies were  
30  
31 no exception [75]. Due to the lack of regular reporting of rabies cases to the WHO from many  
32  
33 member states, the RabNet database was closed down in 2011[76]. Therefore, rabies is not  
34  
35 reportable in many African countries, which restricts data collection by structured surveillance  
36  
37 systems [74]. One Health evolved from the recognition that an interdisciplinary approach is  
38  
39 required to understand complex health problems, and that the health of humans and animals is  
40  
41 inextricably linked [77]. Rabies requires a comprehensive, strategic, and targeted control and  
42  
43 prevention approach with collaboration from human, animal, and environmental health disciplines  
44  
45 at local, national, and global levels to achieve more effective control [78]. In fact, most of African  
46  
47 countries lack a One Health approach to prevent human rabies deaths [79].  
48  
49  
50  
51  
52  
53  
54  
55  
56  
57  
58  
59  
60

1  
2  
3 The WHO, the World Organization for Animal Health (OIE), the Food and Agriculture  
4 Organization (FAO) and the Global Alliance for Rabies Control (GARC) have developed a  
5 strategic global plan to end human canine-mediated rabies by 2030 [7, 12, 80]. This initiative  
6 provides a concerted approach to the prevention of rabies, combined with the strengthening of  
7 human and veterinary health systems. These would enable reaching out to the most underserved  
8 communities in the world by engaging, encouraging and supporting all countries to lead and  
9 improve elimination efforts [74]. This scoping review was therefore designed to map the evidence  
10 on rabies morbidity, mortality, integrated rabies surveillance, prevention and control in African  
11 countries. Its objectives were: (1) to assess the extent of available research on the morbidity and  
12 mortality of rabies due to animal bites conducted in Africa, (2) to identify research gaps in the  
13 literature on the impact of rabies in Africa so as to effectively plan public health intervention, (3)  
14 to ascertain the current level of rabies disease surveillance, prevention and control that exists in  
15 African countries, (4) to assess the published adverse events and complications associated with  
16 human rabies vaccination in African countries, (5) to assess the different types of vaccines used  
17 and the effectiveness of locally produced and imported vaccines in treating rabies in different parts  
18 of Africa, (6) to assess rabies morbidity and mortality associated with dog and contact with an  
19 suspect animal in humans.  
20  
21  
22  
23  
24  
25  
26  
27  
28  
29  
30  
31  
32  
33  
34  
35  
36  
37  
38  
39  
40  
41  
42  
43  
44  
45  
46

## 47 **2. Methodology**

### 48 49 50 **2.1. Study design**

51  
52  
53  
54  
55  
56  
57  
58  
59  
60

1  
2  
3 This paper works' used the PRISMA-ScR checklist [81] and The Joanna Briggs Institute  
4 guidelines [82] as a norm for reporting scoping review. The analysis was conducted in accordance  
5  
6 with the structure suggested by [83], further developed by [84].  
7  
8  
9

## 10 11 **2.2. Eligibility criteria**

12  
13 The search was conducted from 1 January 1946 until 30 May 2020. A PICO (Population-  
14 Interventions-Comparisons-Outcomes) search framework was set, where P (Humans infected with  
15 rabies in African countries), I (Integrated rabies disease surveillance, prevention and control), C  
16 (little or no integrated rabies disease surveillance, prevention and control) and O (reduced human  
17 morbidity and mortality of rabies associated with animal bites) were chosen. The included studies  
18 are described in Supplementary Table 1.  
19  
20  
21  
22  
23  
24  
25  
26  
27

## 28 29 **2.3. Electronic search**

30  
31 We conducted a systematic search of the electronic databases Medline (OVID), EMBASE  
32 (OVID), Cinahl (EBSCOHost), Scopus (Elsevier), Web of Science and Conference  
33 (*rabiesalliance.org*, *www.who-rabies-bulletin.org* and *https://www.oie.int/*). The search  
34 techniques were limited to English. The main search strategy was listed in supplementary material  
35  
36  
37  
38  
39  
40  
41  
42  
43  
44  
45  
46  
47  
48  
49  
50  
51  
52  
53  
54  
55  
56  
57  
58  
59  
60

## 53 54 **2.4. Data charting process**

1  
2  
3 For all studies selected at the abstract level, data were extracted and plotted in the table, covering  
4 author (year) and region, study design and data collection duration, Participants / Comparators,  
5 Interventions and Control Conditions / Exposures, outcomes (rabies mortality and morbidity) and  
6 Key Findings / Gaps / Challenges. The final decision to include studies was taken on the basis of  
7 this data extraction and whether it met the inclusion / exclusion requirements, based on an  
8 independent review by two authors (PSN and JLT) and a discussion of any differences; the third  
9 author (RT) was available for consultation if consensus could not be reached. Our inclusion criteria  
10 were: rabies occurrence or mortality rates, all ages included, only studies performed in Africa,  
11 studies in which at least one intervention included monitoring, prevention and control of rabies,  
12 and then only quantitative studies were included in this study.  
13  
14  
15  
16  
17  
18  
19  
20  
21  
22  
23  
24  
25  
26

27 A data extraction sheet has been developed and used to extract data from included papers. The  
28 data collection sheet included: author, region, year, study design, level of evidence, sample size  
29 description, interventions or exposures, results and key findings / Gaps / Challenges. Two  
30 reviewers (PSN & JLT) worked separately at all levels of the study. The results were then  
31 compared and any variations were addressed and resolved by PSN and JLT. The third author (RT),  
32 who also summarized the findings, was consulted when a discrepancy could not be resolved. The  
33 evaluation of the probability of bias, the methodological standard of the included studies was not  
34 assessed due to the scoping review of the study [83].  
35  
36  
37  
38  
39  
40  
41  
42  
43  
44  
45  
46

## 47 **2.5. Data items**

48  
49 Seven items were listed in the data collection chart table. We included the first author, the year of  
50 publication of the study and the country (item 1). Study design and period of data collection (item  
51 2). The sample size, mean or median age and gender (item 3). The intervention and control  
52  
53  
54  
55  
56  
57  
58  
59  
60

1  
2  
3 conditions / exposures included surveillance, prevention and control of rabies and any other form  
4  
5 of intervention used in human rabies (item 4). The number or rate of human rabies morbidity  
6  
7 included annually or during the study period (item 5). Human rabies mortality recorded the death  
8  
9 or mortality rate annually or during the study period (item 6). Main findings / gaps / challenges  
10  
11 included other outcomes such as data gaps found, available research evidence as well as PEP or  
12  
13 vaccine adverse events (item 7).  
14  
15

## 16 17 18 **2.6. Critical appraisal of individual sources of evidence** 19

20  
21 Methodological quality of included studies was not evaluated due to the scoping nature of the  
22  
23 review [84].  
24  
25

## 26 27 28 **2.7. Synthesis of results** 29

30  
31 Studies were summarized based on author (year) and country, study designs, participants and  
32  
33 comparator, interventions and control conditions/exposures, key outcomes, gaps, findings and  
34  
35 challenges. Interventions were subdivided into rabies prevention, surveillance, control and  
36  
37 management. Table, computed morbidity and mortality rates in case there were not clearly  
38  
39 provided and then we reported the results narratively, as recommended in scoping review were  
40  
41 methodological framework [83].  
42  
43  
44  
45  
46  
47  
48

## 49 50 51 **3. Results** 52

### 53 54 55 **3.1. Study selection** 56 57 58 59 60

1  
2  
3 The searches from the five electronic databases hit a total of 2775 records (Medline: 696, Embase:  
4 952, CINAHL: 289, Scopus: 431 and Web of science: 407) that led to a total of 1127 titles and  
5 abstracts that were screened after the removal of duplicates. We retained 111 of these based on  
6 their title and abstract screening. The full-text screening's stage led to 43 potential articles relevant  
7 to our scoping review. The scoping review flow chart was described in Figure 2.  
8  
9  
10  
11  
12  
13  
14  
15

### 16 **3.2. Study characteristics**

17  
18  
19 The review reported only quantitative studies on rabies surveillance, prevention and control.  
20 Thirty-two quantitative studies were retrospective cohort with 8 months to 14 years of study  
21 duration [21, 30-32, 34, 35, 37, 39-47, 49, 85-99], three studies were mixed designs (retrospective  
22 and cross-sectional study) [48, 100, 101], three prospective cohort studies [33, 36, 102], two Cross-  
23 sectional studies [103,104], one case control [38], one clinical trial [105] and a randomized control  
24 trial [106].  
25  
26  
27  
28  
29  
30  
31  
32  
33

34 We grouped the included studies into five categories based on rabies interventions, namely 1)  
35 prevention and control, 2) surveillance, 3) surveillance and prevention, 4) treatment and control,  
36 and 5) surveillance, prevention and control. Figure 3 showed the distribution of studies according  
37 to the intervention in nineteen African countries. We also summarized all studies included in the  
38 final analyses in Supplementary Table 1 which included seven parts in line with the specified  
39 frameworks for data synthesis: (1) rabies morbidity, (2) rabies mortality, (3) interventions for  
40 rabies control, (4) rabies disease surveillance, prevention and control, (5) available research  
41 evidence, (6) research gaps identified and (7) adverse events and complications associated with  
42 rabies vaccination.  
43  
44  
45  
46  
47  
48  
49  
50  
51  
52  
53  
54  
55  
56  
57  
58  
59  
60



### 3.3. Patient characteristics

A total of 543,714 bite victims were recorded in included studies. Age and sex-specific distribution revealed that the most fatal cases belonged to age groups 0-14 year [30, 34, 36, 39, 44, 46, 47, 49, 85, 92, 93, 95,97, 101, 103]. Other studies identified rabies victims of 15 and above [31, 39, 40, 43, 47, 85, 96, 97, 101, 104]. The median age was 18 years in most of the studies and ranged from one to 95 years. Most of the children were males [46, 47, 95, 97]. However, other study has indicated that females have more animal-related bites than males [30]. Young children are at higher risk of contracting rabies in the absence of PEP and wound care due to the location of the bites they incur [103]. Based on the extent and depth of injury, 1, 567 victims were recorded. Extent and depth of injury was classified as skin broken (11.1 %), scratch (9.25 %), superficial (loss of epidermis only) (36.38 %), deep (27.31 %) and simple (affect only one tissue) (12.38 %) [30, 32, 102, 104]. Further 10, 006 bites were described in regard of the site of exposure among which the head/neck/face (5.08%), leg/feet (61.06%), arm/hand (23.23 %), buttocks/trunk (10.32 %) or multiple (0.31%) [30-34, 43, 48, 94, 96, 100, 103].

Individuals suspected to have rabies were clinically managed by the chief doctor pediatricians and nurses [33, 37, 38, 41, 85, 95, 100, 104]. The main treatments were wound management, antibiotics, prophylaxis against tetanus and rabies. Nine studies reported wound management as part of PEP [33, 38, 41, 48, 94-97]. Reports were collected in hospitals, treatment and health centres, health clinics and pharmacies [104].

### 3.4. Study outcomes

### 3.4.1. Rabies morbidity

Twenty-one studies reported rabies human morbidity in Africa (Table 1 ) [31, 35-40, 42, 44, 47, 49, 85, 87, 89-93, 98, 100-102, 104]. Among them, five studies were undertaken in Tanzania, the first study estimated an average annual incidence per 100,000 bites of 37.1, 11.3 and 33.5 in human population district of Ulanga (193280 inhabitants), Kilombero (321611 inhabitants) and Serengeti (176057 inhabitants) respectively [90]. The second study found that the incidence of bite patients seeking PEP declined substantially (>50%) from 2011 to 2015 [91]. The third study estimated an annual incidence of ~58 cases per 100,000 [42], the fourth study reported a mean incidence of 74 bites considered at risk of rabies transmission per 100,000 persons per year [98] and the last study conducted in Tanzania revealed an average of 75.6 and 19.3 probable rabies exposures per 100,000 persons per year [100]. Three studies conducted in Ghana reported 54 dog-bite victims bitten by rabies-positive dogs within three years [85], 13 cases of human rabies in a 6-year retrospective records review [39] and an annual incidence of rabies cases of 172 per 100,000 population [49]. Four studies reported rabies morbidity in Ethiopia. Yizengaw et al. 2018 reported a high incidence rate of rabies exposure during spring (360, 39%) and summer (244, 26.4%) seasons and a total of 924 human rabies exposure cases received the anti-rabies post-exposure prophylaxis from September 2015 to August 2017 [101]. The incidence of human rabies exposure was reported to be 40 per 100,000 population in Ethiopia [34], annual estimated rabies incidence of 2.33 cases per 100,000 in humans [102] and the incidence of human rabies exposure cases calculated per 100,000 populations was 35.8, 63.0, 89.8 and 73.1 in 2012, 2013, 2014 and 2015, respectively [94]. A study conducted in Zimbabwe found among rabies-suspect, 42 (73.7%) were positive [40]. In Madagascar, nine of the 11 suspected human cases tested from 2005 to 2010 with a laboratory confirmed for rabies [87]. In Uganda, a total of 208,720 patients with animal bite injuries were

1  
2  
3 treated at health facilities across the country [89]. Ivory Coast reported 50 cases of human rabies  
4  
5 with annual incidence of 0.06–0.08 per 100,000 [36]. Human animal-bite injuries incidence was  
6  
7 289 per 100,000 persons with the highest incidence reported at 302 per 100,000 and lowest at 121  
8  
9 per 100,000 persons in Kenya [39]. Another undertaken in Malawi reported 14 paediatric rabies  
10  
11 cases during the study period [93]. A six-year retrospective study revealed 31 positive cases of  
12  
13 human rabies in Madagascar [47]. In Democratic Republic of Congo, a five year retrospective  
14  
15 study found 29 positive to rabies in a total of 5,053 dog bites recorded in the veterinary clinics [35]  
16  
17 and Frey 2013 estimated an annual incidence of bites from suspected rabid animals of 12.9/100  
18  
19 000 and an incidence of 0.7 human rabies deaths/ 100,000 in Chad [104]. Namibia reported above  
20  
21 16 cases per year from 2011 until 2015 with a maximum of 23 cases observed in 2015 with an  
22  
23 incidence of 1.0 and 2.4 per 100,000 inhabitants and per year on average [44].  
24  
25  
26  
27  
28  
29

30 **Table 1 : Mapping human rabies morbidity rate**  
31  
32

| Country (region, district and town)                                                           | Human rabies morbidity rate                                                                                                                                                                                                                                                                                              | Study duration                                                                                                                                       |
|-----------------------------------------------------------------------------------------------|--------------------------------------------------------------------------------------------------------------------------------------------------------------------------------------------------------------------------------------------------------------------------------------------------------------------------|------------------------------------------------------------------------------------------------------------------------------------------------------|
| Chad (N'Djamena)                                                                              | An annual incidence of bites from suspected rabid animals of 12.9/100 000 [104]                                                                                                                                                                                                                                          | Seven months, September 2008 - April 2009 [104]                                                                                                      |
| Democratic Republic of Congo (Kinshasa)                                                       | 29 positives to rabies in 5,053 dog bites recorded in the veterinary clinics [35]                                                                                                                                                                                                                                        | Five years, 2009-2011 [35]                                                                                                                           |
| Ethiopia (National level; Ababa and outside of Addis Ababa; North Gondar administrative zone) | A total of 924 human rabies reported [102]. The incidence of human rabies exposure was reported to be 40 per 100,000 population in Ethiopia [34]; Annual estimated rabies incidence of 2.33 cases per 100,000 in humans [102]; The incidence of human rabies exposure cases calculated per 100,000 populations was 35.8, | One year, January 2016-31 December 2016 [34]; Two years, 2015-2017 [101]; three years, 2012-2015 [92]; Eleven months, April 2009 - March 2010 [102]. |

|                                                                                                                                                                               |                                                                                                                                                                                                                                                                                                                                                                                                                                        |                                                                                                                                                                |
|-------------------------------------------------------------------------------------------------------------------------------------------------------------------------------|----------------------------------------------------------------------------------------------------------------------------------------------------------------------------------------------------------------------------------------------------------------------------------------------------------------------------------------------------------------------------------------------------------------------------------------|----------------------------------------------------------------------------------------------------------------------------------------------------------------|
|                                                                                                                                                                               | 63.0, 89.8 and 73.1 every year [92]                                                                                                                                                                                                                                                                                                                                                                                                    |                                                                                                                                                                |
| Ghana (Techiman Municipality; Eastern Region of Ghana)                                                                                                                        | 54 dog-bite victims bitten by rabies-positive dogs [85]; 13 cases of human [39]; An annual incidence of rabies cases of 172 per a population of 100,000 [49]                                                                                                                                                                                                                                                                           | Four years, 2009-2012 [85]; Six years, 2011-2016 [39]; Two years, 2013–2015 [49]                                                                               |
| Ivory Coast (National level)                                                                                                                                                  | Annual incidence of 0.06–0.08 per 100,000 [36]                                                                                                                                                                                                                                                                                                                                                                                         | Three years, 2014-2016 [36]                                                                                                                                    |
| Kenya (Machakos and Kitui counties in lower eastern region; Kisumu County in Lake Victoria basin; Nandi County in Central rift valley and Kilifi coastal region).             | Human animal-bite injuries incidence of 289 per 100,000 persons [31]                                                                                                                                                                                                                                                                                                                                                                   | Six years, 2011- 2016 [31]                                                                                                                                     |
| Madagascar (National level)                                                                                                                                                   | Nine of the 11 suspected human cases tested with a laboratory confirmed for rabies [87].<br><br>31 positive cases of human rabies reported [47].                                                                                                                                                                                                                                                                                       | Six years, 2006-2011 [87]; Six years, 2005-2010 [47]                                                                                                           |
| Malawi (Blantyre)                                                                                                                                                             | 14 paediatric rabies cases reported [93].                                                                                                                                                                                                                                                                                                                                                                                              | Six years, 2012-2017 [93]                                                                                                                                      |
| Namibia (Kavango)                                                                                                                                                             | An incidence of 1.0 and 2.4 per 100,000 inhabitants and per year on average [44]                                                                                                                                                                                                                                                                                                                                                       | Seven years, 2011-2017 [44]                                                                                                                                    |
| Tanzania (Mwanza region; Tabora; Shinyanga; Mara; Ulanga; Kilombero; Serengeti; Dodoma Region; Ngorongoro districts in northern Tanzania and in the 11 districts in southern) | Average annual incidence per 100,000 bites of 37.1, 11.3 and 33.5 in Human population [90]<br>An incidence of bite patients seeking PEP declined substantially (>50%) [96].<br>An annual incidence of 58 cases per 100,000 [42]<br>Mean incidence of 74 bites considered at risk of rabies transmission per 100,000 persons per year [98].<br>An average of 75.6 and 19.3 probable rabies exposures per 100,000 persons per year [100] | Five years, 2002-2006 [42]; Four years, 2002-2006; [90]; January 2011 to January 2013 [91]; Seven years, 2008-2014 [98]; 2002–2017; 2011–2017; 2011–2016 [100] |
| Uganda (National level)                                                                                                                                                       | 208,720 patients with animal bite injuries treated at across the country [89].                                                                                                                                                                                                                                                                                                                                                         | Fourteen years, 2001-2015 [89]                                                                                                                                 |
| Zimbabwe (National level)                                                                                                                                                     | Among rabies-suspect, 42 (73.7%) were positive [40].                                                                                                                                                                                                                                                                                                                                                                                   | Eleven years, 1992-2003 [40]                                                                                                                                   |

### 3.4.2. Rabies mortality

Sixteen studies reported rabies related mortality in Africa (Table 2) [21, 32, 38, 41, 43, 45, 46, 86, 88-90, 99, 100,102-104]. Ethiopia reported three studies among which 320 people, diagnosed clinically, died of rabies in a 5-year retrospective study conducted in the national level [21], 386 human rabies fatality were reported in a 8-year retrospective study with annual range of 35 to 58 deaths in Addis Ababa and outside of Addis Ababa [46]. There were also 32 cases in human rabies recorded from which three humans ended with fatality in North Gondar administrative zone [102]. Four studies assessed rabies mortality in Tanzania from which Ulanga, Kilombero and Serengeti districts reported human rabies mortality rates of 2.4; 0.8 and 1.4/100,000 per year respectively [90]. Sixteen human deaths (1,291 victims bite) due to rabies were reported within the Integrated Bite Case Management (IBCM) study across 20 districts in 4 regions in Southern, Central, and Northern Tanzania [99]. Other studies reported twenty-eight deaths from suspected rabies cases during the five-year period in the two districts, an average of 1.5/100,000 per year in Serengeti and 2.3/100,000 in Ngorongoro [45]. Fourteen (14) among 1005 victim bites died showing clinical signs of rabies within 5 years [100]. Three (3) studies identified rabies mortality in Uganda. Among them, were 592 (95% CI 345–920) deaths [103], 1 dose of PET was sufficient for protection following a rabid animal bite. Another research estimated a total of 371 deaths of rabies with a cumulative total of 117,085 rabies cases in nine years [88] and a 14-year retrospective study revealed a total of 486 suspected human rabies deaths among 208,720 patients with animal bite injuries treated at health facilities across the country [89]. A study undertaken in Moramanga district (Madagascar) recorded an annual incidence of 42–110 rabies exposures and 1–3 deaths per 100,000 persons [32]. An estimated 7 rabies deaths (95% confidence interval 4–10 deaths) per year was recorded in N'Djamena (Chad) [102]. A study conducted in Algeria excluding Sahara

region found an annual average of 20.6 human rabies deaths [91]. A total of 14 cases of fatal rabies with 12 death reported in Maputo City is the capital of Mozambique [38]. An average annualized rabies attack rate of 136 rabies cases per 100 000 dog-bite injuries (7/5 139) with 6/7 deaths were reported in South Africa [43]. There were patients with furious rabies manifestations and the case-fatality rate of 100% in a study conducted in Kinshasa (DRC) [41].

**Table 2: Mapping human rabies mortality rate**

| Country (region, district and town)                                                           | Morbidity rate                                                                                                                                                                        | Study duration                                                                                                                                                                                                                                                      |
|-----------------------------------------------------------------------------------------------|---------------------------------------------------------------------------------------------------------------------------------------------------------------------------------------|---------------------------------------------------------------------------------------------------------------------------------------------------------------------------------------------------------------------------------------------------------------------|
| Algeria (National level excluding Sahara region)                                              | An annual average of 20.6 human rabies deaths [86]                                                                                                                                    | Thirteen years, 2006-2018 [86]                                                                                                                                                                                                                                      |
| Chad (N'Djamena)                                                                              | An estimated 7 rabies deaths (95% confidence interval 4–10 deaths) per year [104]                                                                                                     | Eight months, September 2008 to April 2009 [104]                                                                                                                                                                                                                    |
| Democratic Republic of Congo (Kinshasa)                                                       | Case-fatality rate of 100% [41]                                                                                                                                                       | Eight months, December 2008 and July 2009 [41]                                                                                                                                                                                                                      |
| Ethiopia (National level, Ababa and outside of Addis Ababa, North Gondar administrative zone) | 320 people died of rabies in a 5-year [21].<br><br>386 humans rabies fatality were reported with annual range of 35 to 58 deaths [46]<br><br>32 cases in human rabies recorded [102]. | Five years, 1997-2001, [21]; Eight years, 2001-2009 [46]; Eleven months, April 2009 - March 2010 [102]<br><br>One year, January 2016 - 31 December 2016 [34]; Two years, 2015-2017 [101]; three years, 2012-2015 [92]; Eleven months, April 2009 - March 2010 [102] |
| Madagascar (Moramanga district)                                                               | An annual incidence of 42–110 rabies exposures and 1–3 deaths per 100,000 persons [32]                                                                                                | One year, 2016-2017 [32]                                                                                                                                                                                                                                            |
| Mozambique (Maputo city)                                                                      | A total of 14 cases of fatal rabies with 12 deaths [35]                                                                                                                               | Three months, April - July 2014 [35]                                                                                                                                                                                                                                |
| South Africa (Uthungulu District of Kwazulu-Natal province)                                   | An average annualized rabies attack rate of 136 rabies cases per 100 000 dog-bite injuries (7/5 139) with 6/7 [43]                                                                    | Three years, 2008-2009 [43]                                                                                                                                                                                                                                         |
| Tanzania (Ulanga, Kilombero and Serengeti districts; 20 districts in 4 regions in             | Human rabies mortality rates of 2.4; 0.8 and 1.4/100,000 per year respectively [90].                                                                                                  | Five years, 2002 - 2006 [45]; Three years, 2006-2008 [90];                                                                                                                                                                                                          |

|                                                                     |                                                                                                                                                                                                                                                                                                                                                               |                                                                                   |
|---------------------------------------------------------------------|---------------------------------------------------------------------------------------------------------------------------------------------------------------------------------------------------------------------------------------------------------------------------------------------------------------------------------------------------------------|-----------------------------------------------------------------------------------|
| Southern, Central, and Northern Tanzania; Serengeti and Ngorongoro) | <p>Sixteen human deaths (1,291 victims bite) due to rabies were reported [100].</p> <p>Twenty-eight deaths from suspected rabies cases during the five-year period in the two districts, an average of 1.5/100,000 per year and 2.3/100,000 [45]</p> <p>Fourteen (14) among 1005 victim bites died showing clinical signs of rabies within 5 years [100].</p> | 2002–2017; 2011–2017; 2011–2016 [100]                                             |
| Uganda (National level; ten district)                               | <p>592 (95% CI 345–920) deaths [103]</p> <p>An estimated a total of 371 deaths of rabies with a cumulative total of 117,085 rabies cases in nine years [88]</p> <p>A total of 486 suspected human rabies deaths among 208,720 patients in fourteen years[89]</p>                                                                                              | Eight years, 2001 – 2009 [88]; Fourteen years, 2001–2015 [89]; Three months [103] |

### 3.4.3. Rabies disease surveillance, prevention and control

#### 3.4.3.1. Rabies prevention and control

The review summarized rabies prevention and control in point of view rabies exposure status, PEP, dog vaccination and seasonality. Among 36,741 bite victims recorded in studies reporting PEP [30, 42, 46, 85, 92, 93, 98], the PEP was initiated based on WHO grade of exposure [107]. We found 505 bites in grade 1 (8.78%), 2050 in grade 2 (35.63%) and 3199 in grade 3 (55.59%) [33,



1  
2  
3 34, 43, 96, 97]. The overall PEP course among bite victims varied between 24% to 99% [30, 85].  
4  
5 We reported 2,652 bites victims in studies reporting PEP and mass dog vaccination [34, 39, 40,  
6  
7 86, 101]. Dog vaccination coverage varied from 14.1% to 68.78% [34,86]. In Ethiopia and  
8  
9 Zimbabwe, the dog vaccination decreased significantly across the study and also the health status  
10  
11 of most dogs involved in biting was unknown [40,101]. Rabies prevention and control also  
12  
13 depended on the seasonality. In Ethiopia, two studies reported season wise rabies exposure. The  
14  
15 first study reported rabies exposure during spring (360/924, 39%) and summer (244/924, 26.4%)  
16  
17 seasons [101]. The second study that found the highest human rabies exposures were reported in  
18  
19 spring (April to June) followed by winter (January to March) while the lowest distribution of  
20  
21 human rabies exposure was recorded in autumn (October to December) [34]. In Nigeria, Osaghae  
22  
23 et al. reported the prevalence of dog bite was highest, 41/81 (50.6%), during the hot season (April–  
24  
25 June) and low, 14/81 (17.3%), during the wet season (July–October) [94]. Another study  
26  
27 conducted in Nigeria recorded the highest number of dog bites with two peaks in April and October  
28  
29 2008 [48]. However, the number of dog bite cases was lowest. For all years the numbers of dog  
30  
31 bite cases recorded were lowest at the beginning of the year and dog bites increased during the last  
32  
33 3 months (October-December) of the year 2006 [48]. Animal-to-human rabies transmission was  
34  
35 highest during the dry months of July to November in Zimbabwe [40]. In DRC, a study found  
36  
37 there was no seasonal difference observed for rabies occurrence either for clinical cases or  
38  
39 confirmed cases throughout the study period [35]. In Tanzania, each year, the majority of rabies  
40  
41 cases were recorded during the period June to October [42]. In the dry season, significantly fewer  
42  
43 rabies positive cases were reported than in the rainy season in Namibia [44]. In Chad, more rabies  
44  
45 records per month were collected during the hot, dry season months (March and April), than during  
46  
47 the dry season months (September–February) [104]. In Senegal, dog bite victims were higher in  
48  
49  
50  
51  
52  
53  
54  
55  
56  
57  
58  
59  
60



1  
2  
3 dry season (Nov-May) than rainy season (June-Oct) [33]. Besides, bite victims in rural areas took  
4 longer, on average, to receive PEP than those in urban areas [90, 98, 101]. Probable human rabies  
5 cases were higher in rural than urban areas [34,36].  
6  
7  
8  
9

### 10 11 **3.4.3.2. Rabies surveillance, prevention and control**

12

13  
14 The findings revealed that 39,802 bites victims were recorded in rabies surveillance and prevention  
15 interventions. The studies included laboratory, database and network surveillances [35, 37, 43, 47,  
16 91]. The rabies prevention included PEP and dog vaccination. Laboratory surveillance has  
17 improved rabies diagnostic [35, 37, 43, 47, 91] and database and network surveillances improved  
18 mortality and morbidity records [36, 43, 91] and allowed better estimates of the true rabies burden  
19 [37] Further, Compliance with PEP regimens was significantly higher, rating from 83.7% to 93%  
20 in two studies [43, 91]. In contrast, dog vaccination remained low (10%-12.6%) [37, 47].  
21  
22  
23  
24  
25  
26  
27  
28  
29  
30

31  
32 We found five studies including rabies diseases surveillance, prevention and control [32, 33, 38,  
33 45, 99, 100]. Among them, three studies [33, 38, 45] have reported significantly improved rabies  
34 morbidity and mortality and also PEP uptake. The PEP uptake was 71% and it dramatically  
35 reduced the risk of developing rabies [40]. Another study did not report any death with high  
36 number of patients receiving PEP [33].  
37  
38  
39  
40  
41  
42  
43

44  
45 A combined strategy of mass dog vaccination, enhanced surveillance, and expanded access to PEP  
46 reduced the annual incidence of rabies exposures and deaths annually in Madagascar [32]. Strict  
47 measures such as vaccination of dogs in the neighborhoods where human rabies cases had  
48 occurred, mass vaccination campaign of dogs, participation of private veterinary clinics in animal  
49 vaccination, collection of stray dogs in selected neighborhoods and community education  
50  
51  
52  
53  
54  
55  
56  
57  
58  
59  
60

1  
2  
3 regarding prevention and control measures had drastically reduced rabies cases in human to 14  
4  
5 during the study period in Mozambique [38].  
6  
7

### 8 9 **3.4.3.3. Post exposure management**

10  
11 We found seven studies on rabies management and control. Among them, six studies addressed  
12 wound management and PEP [41, 48, 94, 95, 96, 104]. Wound severity was graded as follows, 0  
13 = no apparent injury seen, 1 = skin scratch with no bleeding, 2 = minor wound with some bleeding,  
14 3 = deep or multiple injury [96]. The reported severity of the wound was classified as deep wound,  
15 lacerated wound, superficial wound or scratch [104]. The severity of the injury was determined  
16 using the WHO dog bite injury grading system [107]. Soap, water, wound dressing, tetanus  
17 prophylaxis, anti-rabies vaccination, intravenous fluids, diazepam and antibiotics were also part of  
18 the management. The overall review reported 5754 bites managed according to the WHO dog bite  
19 injury grading system, 3199 (55.59%) were grade 3; 2050 (35.63%) were grade 2; and 505 (8.78%)  
20 were grade 1. In 52 cases (7%), grade of bite was not recorded [31, 32, 41, 94, 98].  
21  
22  
23  
24  
25  
26  
27  
28  
29  
30  
31  
32  
33  
34  
35  
36

### 37 **3.4.4. Available research evidence on human rabies**

38  
39 Rabies cases in various committees emphasize the need for active surveillance by following up of  
40 people bitten by animals and mass dog vaccinations to alleviate the zoonotic threat of the virus  
41 [88]. Strengthening rabies surveillance, controlling rabies in dogs, proper post exposure  
42 management, increasing the awareness of the community and ensuring availability of post  
43 exposure prophylaxis at lower health facilities are the best approach of eliminating rabies [89, 93,  
44 102]. Other studies have demonstrated that reinforcements of rabies surveillance system can  
45 improve rabies reporting, which ultimately allows for better estimates of the true  
46  
47  
48  
49  
50  
51  
52  
53  
54  
55  
56  
57  
58  
59  
60

1  
2  
3 rabies burden in the countries [35, 37, 43, 91]. Compliance with PEP regimens was significantly  
4  
5 higher for patients following the implementation of automated reminders in comparison to patients  
6  
7 attending normal clinics [43, 91]. Other studies concluded that preventing dog bites would most  
8  
9 effectively reduce bite injuries by improving public health education among children below 15  
10  
11 years [43]. Public health education is also enhanced by encouraging early PEP initiation and  
12  
13 completion, development and implementation of responsible dog ownership, animal behaviour  
14  
15 educational programmes as well as improving human and veterinary health linkages [31, 43].  
16  
17 Evidence also showed that no rabies victim in Mozambique received full post-exposure  
18  
19 vaccination and the factors significantly associated with human rabies were: age <15 years (p =  
20  
21 0.05), bite by stray dog (p = 0.002), deep wound (p = 0.02), bite in the head (p = 0.001), bite by  
22  
23 unimmunized dog (p = 0.01), no use of soap and water (p = 0.001), and no PEP (p = 0.01) [40].  
24  
25 Studies have shown that all the rabies vaccines including suckling mouse brain virus (SMBV),  
26  
27 fetal bovine kidney virus (FBKV), purified chicken embryo cell rabies vaccine, purified vero cell  
28  
29 rabies vaccine, sheep brain anti- rabies vaccine, human diploid-cell vaccine and Purified equine  
30  
31 rabies immunoglobulin) and RIG were efficacious. However, the WHO and OIE contraindicated  
32  
33 SMBV and FBKV in both animals and humans [30, 32, 33, 37, 46, 47, 103, 105, 106].  
34  
35 Furthermore, a clinical trial with a purified chicken embryo cell rabies vaccine dose used  
36  
37 intramuscularly every two years generated ineffective immune response to rabies virus [105] as  
38  
39 the Zagreb protocol (2 intradermal injections of 0.1 mL at two sites, deltoids and/or thighs, on days  
40  
41 0, 3, 7 and 28) was not applied. Even though a randomized control trial showed antibody response  
42  
43 26.7% of SMBV recipients and 28.6% of FBKV recipients within a week, both SMBV and FBKV  
44  
45 were equally efficacious and well tolerated [106], however those vaccines are contraindicated by  
46  
47 WHO because of its association with neurological adverse reactions (severe allergic  
48  
49  
50  
51  
52  
53  
54  
55  
56  
57  
58  
59

encephalomyelitis), further these vaccines are inferior to modern vaccine in terms of potency and immunogenicity [108]. The table 3 describes available research evidence on human rabies in Africa.

**Table 3: Mapping human rabies evidence identified in Africa**

| Evidence map                                                                                                                                        | Studies                    | Impacts/Outcomes                                                                                                                                                                                                                                       |
|-----------------------------------------------------------------------------------------------------------------------------------------------------|----------------------------|--------------------------------------------------------------------------------------------------------------------------------------------------------------------------------------------------------------------------------------------------------|
| Strengthening rabies surveillance                                                                                                                   | [36,37,43,88,89,91,93,102] | Reinforcements of rabies surveillance system can improve rabies reporting and increasing the awareness of the community and ensuring availability of post exposure prophylaxis at lower health facilities are the best approach of eliminating rabies. |
| Automated SMS reminders and telephone contacts                                                                                                      | [43,45, 91,99,100]         | Compliance with PEP regimens was significantly higher for patients following the implementation of automated SMS reminders and telephone contacts.                                                                                                     |
| Public health education (PEP initiation and completion, responsible dog ownership, behaviour educational programmes and veterinary health linkages) | [31,43,48,89,93,102]       | Lack of enforcement of regulations for licensing of dogs and rabies vaccination increased human rabies morbidity and mortality.                                                                                                                        |
| Accurate rabies diagnostic                                                                                                                          | [32,36,37,39,40,47,87,100] | The diagnosis of dog bite and rabies was clinical and laboratory-based. This improved accurate rabies cases reporting.                                                                                                                                 |
| Mass dog vaccination                                                                                                                                | [40,86,93]                 | Even though the 70% coverage was not achieved, there was an inverse relationship between dog vaccination coverage and dog rabies cases during the study period.                                                                                        |

|                                                                                                                                                                                                                      |                               |                                                                                                                                              |
|----------------------------------------------------------------------------------------------------------------------------------------------------------------------------------------------------------------------|-------------------------------|----------------------------------------------------------------------------------------------------------------------------------------------|
| SMBV, FBKV, purified chicken embryo cell rabies vaccine, purified vero cell rabies vaccine, sheep brain anti- rabies vaccine, human diploid-cell vaccine and Purified equine rabies immunoglobulin (Zagreb protocol) | [ 30,32,33,36,47,103,105,106] | Studies have shown that all the rabies vaccines and RIG were efficacious and well tolerated. However, the WHO contraindicated SMBV and FBKV. |
| Effective rabies control and management                                                                                                                                                                              | [37, 43, 86, 93]              | PEP, mass dog vaccination, and WHO dog bite injury-grading system                                                                            |
| Integrated bites case management/ Rabies Diseases Surveillance, Prevention and Control                                                                                                                               | [32,33, 38,45,99,100]         | Studies have shown the importance of coordinated surveillance, prevention and control in the eradication of rabies.                          |

### 3.4.5. Adverse events and complications associated with rabies vaccination

Adverse events and complications associated with rabies vaccination were reported based on SMBV, FBKV, purified chicken embryo cell rabies vaccine, purified vero cell rabies vaccine, sheep brain anti- rabies vaccine, human diploid-cell vaccine and purified equine rabies immunoglobulin. All the 4-dose or Zagreb regimen was reported in all the RIG [109]. Among the studies reporting rabies vaccination, only one study using a purified vero cell rabies vaccine at D0 (2 doses), D7 (one dose) and D21 (one dose) study found that adverse events occurred in 6% of the patients with two doses and after the third dose 3% developed adverse event. However, most of the adverse events were minor and associated with headache fever and pain at the injection site that occurred simultaneously on the same day of the vaccine injection [33]. Other studies did not report any adverse events and complications associated with rabies vaccination [30, 32, 37, 46, 47,103, 105, 106].

### 3.4.6. Research gaps identified

In this review, we identified 66.67% African countries reporting poor rabies diagnostic capacity, 50 % reported the lack of coordinated surveillance, 50% showed the lack of PEP course completion, 22.22% had insufficient rabies control, and 77.78% had low dog vaccination coverage. Insufficient knowledge and practice on rabies prevention was also identified as a gap. However, we did not find enough studies to evaluate this gap in Africa (Table 4).

The recorded data available so far has showed the underestimation of rabies diagnosis, post exposure prophylaxis and fatal human cases and could be attributed to poor diagnostic capacity and the absence of national rabies surveillance system. In African countries, rabies diagnostic is mostly clinical [21, 31, 33-35, 38, 41, 43, 44, 46, 49, 88-90, 93-95, 98, 103, 104] Among eleven studies including human rabies surveillance, only four reported adequate and successful surveillances [36,37,43,91], twelve studies reported lack of accurate data or non-existing surveillance data [31, 35, 38, 43, 44, 47, 49, 87-89,103,104] (Table 4). Other studies reported that dog-bite victims did not complete the post exposure anti human rabies vaccine course and were not likely to be post exposure prophylaxis [32, 33, 36, 42, 43, 45, 85, 90, 95, 98, 100] (Table 4). The exposure victims considered to be at risk of rabies either did not receive any PEP or did not receive all PEP vaccinations due to unavailability, shortage, cost barriers, insufficient knowledge about prompt PEP, category 1 exposure injury or misadvice [37, 41, 43, 45, 48, 49, 96, 99, 100]. A study has reported that the lack of PEP was the cause of 100% fatality rate in Democratic Republic of Congo [41]. There was significant difference between rural and urban exposure cases in respect to the time of arrival to the hospital and living in rural area was statistically associated with loss to follow up after the first dose [35, 48, 98, 101]. There was also high human rabies exposure rate in children and in the rural community [32, 35, 98, 101]. Insufficient knowledge

about rabies dangers and prevention, particularly prompt PEP, but also wound management, was the main cause of rabies deaths [45]. A higher proportion of human rabies exposures was caused by unprovoked dogs and of these, the majority were unvaccinated [34, 48]. Dog vaccination remains an urgent intervention gap. Among eighteen studies conducted in nine countries, none of them reported the target of 70% of dog vaccination (Table 4). The highest dog vaccination rate was reported in Algeria (67.3%) [86] and the lowest in Madagascar (10%) [47].

**Table 4: Mapping research gaps and strengths in Africa**

| African countries            | Mapping research gaps and strengths in Africa |                          |                                                |                     |                                                          |                                     |
|------------------------------|-----------------------------------------------|--------------------------|------------------------------------------------|---------------------|----------------------------------------------------------|-------------------------------------|
|                              | Diagnostic capacity                           | Coordinated surveillance | Lack of PEP course completion /PEP unavailable | Inefficient control | Insufficient knowledge and practice on rabies prevention | Low dog vaccination coverage(<70 %) |
| Algeria                      | N/A                                           | N/A                      | N/A                                            | √<br>[91]           | N/A                                                      | X<br>[91]                           |
| Cameroon                     | √<br>[37]                                     | √<br>[37]                | X<br>[37]                                      | √<br>[37]           | N/A                                                      | X<br>[37]                           |
| Chad                         | X<br>[109]                                    | X<br>[109]               | X<br>[109]                                     | X<br>[109]          | N/A                                                      | X<br>[109]                          |
| Democratic Republic of Congo | X<br>[35,41]                                  | X<br>[35]                | X<br>[35,41]                                   | X<br>[35,43]        | N/A                                                      | X<br>[43]                           |
| Ethiopia                     | X<br>[21,34,46]                               | N/A                      | X<br>[92]                                      | X<br>[34,92,102]    | X<br>[102]                                               | X<br>[34,92,102]                    |
| Ghana                        | X<br>[49]                                     | X<br>[49]                | X<br>[49,85]                                   | X<br>[39,49,85]     | N/A                                                      | X<br>[39,85]                        |
| Ivory Coast                  | √<br>[36]                                     | √<br>[36]                | X<br>[36]                                      | X<br>[36]           | N/A                                                      | X<br>[36]                           |
| Kenya                        | X<br>[31]                                     | X<br>[31]                | X<br>[31]                                      | X<br>[31]           | N/A                                                      | N/A                                 |
| Madagascar                   | √<br>[32,47,87]                               | X<br>[47,87]             | X<br>[32,47]                                   | X<br>[32,47,87]     | N/A                                                      | X<br>[32,47]                        |
| Malawi                       | X<br>[93]                                     | √<br>[93]                | √<br>[93]                                      | √<br>[93]           | N/A                                                      | N/A                                 |

|              |                  |                  |                        |                        |           |               |
|--------------|------------------|------------------|------------------------|------------------------|-----------|---------------|
| Mozambique   | X<br>[38]        | X<br>[38]        | X<br>[38]              | X<br>[38]              | N/A       | X<br>[38]     |
| Namibia      | X<br>[44]        | X<br>[44]        | N/A                    | X<br>[44]              | N/A       | N/A           |
| Nigeria      | X<br>[94,95]     | N/A              | X<br>[48,94-96]        | X<br>[48,94-96]        | N/A       | X<br>[48]     |
| Senegal      | X<br>[33]        | √<br>[33]        | X<br>[33]              | X<br>[33]              | √<br>[33] | X<br>[33]     |
| Tanzania     | X<br>[91,98]     | √<br>[90,98]     | X<br>[42,45,90,98,100] | X<br>[42,45,90,98,100] | X<br>[45] | N/A           |
| Uganda       | X<br>[88,89,103] | X<br>[88,89,103] | X<br>[103]             | X<br>[88,89,103]       | N/A       | X<br>[88,103] |
| South Africa | √<br>[43]        | √<br>[43]        | X<br>[43,97]           | √<br>[43]              | N/A       | N/A           |
| Zimbabwe     | √<br>[40]        | √<br>[40]        | N/A                    | X<br>[40]              | N/A       | X<br>[40]     |

Footnote: “X: research gaps identified in different included studies; √: research strengths identified in different studies; N/A: Not applicable”

#### 4. Discussion

This is to our knowledge, the first scoping review synthesizing publically available data on rabies in Africa and to weigh such data in support of the global goal of 'zero human rabies deaths by 2030'. The purpose of this scoping analysis was to provide a summary of evidence on rabies morbidity, mortality, integrated rabies surveillance, prevention and control in Africa. Overall, studies have shown that African countries face a range of problems from the point of view of rabies surveillance, prevention and control that have a negative effect on rabies mortality and morbidity. Reviewing rabies morbidity and mortality rates across Africa, data obtained fluctuated largely over time and space in various countries, as well as in different regions or districts across the same area.

While some countries may have shown significant improvement in rabies morbidity and mortality



1  
2  
3 data, the morbidity and mortality rates in Africa generally remain high. Included studies showed  
4 no standardization in reporting human rabies outcomes, human rabies morbidity and mortality  
5 rates were reported in term of annual incidence and number of infected human rabies and deaths  
6 related to rabies. Moreover, small-scale studies may not reflect the national or regional human  
7 rabies morbidity and mortality rates. Then this was difficult to have an accurate picture per country  
8 and assess human rabies situation between African countries.  
9

10  
11  
12 These are the consequences of lack of laboratory rabies confirmation, epidemiological  
13 surveillance, inadequate mass dog vaccination and PEP policy, and unreported clinical cases in  
14 African countries. Lack of monitoring data on rabies or low data quality is problematic, resulting  
15 in rabies being poorly addressed in most African countries. Results have also shown that, of the  
16 eleven countries in which rabies surveillance has been applied, only four studies reported that  
17 surveillance decreased rabies morbidity and mortality [36, 37, 43, 91]. Comparing old and new  
18 data (before and after the “zero rabies by 2030” target), rabies diagnostic and surveillance has not  
19 improved in most of the African countries. As a result, well-structured rabies surveillance  
20 enhanced the reporting of morbidity and mortality and also has a visible impact on rabies  
21 elimination strategy in Africa. While strategies have been subdivided into surveillance, prevention,  
22 control and management of rabies (see table of included studies), only three studies have shown  
23 the efficacy of the combination of surveillance, prevention and control of rabies [33, 38, 45].  
24 However, passive surveillance has shown its limitations in rabies elimination because cases are  
25 reported clinically with or without laboratory-based strategies, inducing inaccurate diagnostic,  
26 scarcity of laboratory confirmation and poor reporting system [31, 44, 47, 88, 89, 103]. This is  
27 why both passive and active surveillance are preferable to strengthen rabies monitoring and  
28 reporting in African countries [110]. Strengthening rabies surveillance also is the foundation of  
29  
30  
31  
32  
33  
34  
35  
36  
37  
38  
39  
40  
41  
42  
43  
44  
45  
46  
47  
48  
49  
50  
51  
52  
53  
54  
55  
56  
57  
58  
59  
60

1  
2  
3 the provision of actionable data for efficient management of wildlife diseases [111]. Besides, the  
4 review has shown that strengthening surveillance, prevention and management of rabies has shown  
5 good evidence in three separate studies [33, 38, 45]. Coordination of surveillance, prevention and  
6 control of rabies can play an important role in the eradication of rabies in Africa. It is worth noting  
7 that specific awareness of when and where disease occurs is essential to the formulation of  
8 prevention, control and elimination strategies [111].  
9

10  
11  
12 As seen above, the implementation of different rabies interventions at national level has never been  
13 reached in African countries. It is vital that African countries achieve the 2030 target of eliminating  
14 human rabies by providing readily accessible and affordable PEP in all countries in the continent  
15 where rabies infection is endemic. The exposure victims considered to be at risk of rabies either  
16 did not receive any PEP or did not receive complete PEP vaccinations due to unavailability,  
17 shortage, cost barriers, insufficient knowledge about prompt PEP or misadvice  
18 [37,41,45,49,96,99,100]. This could be emulated from Thailand, which has significantly reduced  
19 human deaths from rabies to fewer than 10 cases per year by educating the public and health  
20 workers and delivering PEP free of charge across the country before mass dog vaccination  
21 achieved the minimum 70 per cent coverage [112,113]. When provided correctly and in a timely  
22 manner, rabies PEP is almost 100% effective in the prevention of disease [73,114]. The findings  
23 of the review revealed that the dog victims found to be at risk of rabies either did not receive PEP  
24 or did not receive all the PEP vaccines due to unavailability, shortages, cost barriers, long distance  
25 travel to the hospital or misadvice [32, 33, 36, 37, 41, 42, 45, 49, 85, 90, 95, 96, 98-100]. It is  
26 important to remember that PEP combined with other treatments such as soap, water, wound  
27 dressing, antibiotics, tetanus prophylaxis and anti-rabies vaccination has been shown to be  
28 beneficial for dog bite victims. Two studies have shown that compliance with PEP regimens was  
29  
30  
31  
32  
33  
34  
35  
36  
37  
38  
39  
40  
41  
42  
43  
44  
45  
46  
47  
48  
49  
50  
51  
52  
53  
54  
55  
56  
57  
58  
59  
60

1  
2  
3 substantially higher for patients who did not receive PEP after automated reminders [43, 91].  
4  
5 Taken together, our results point to a sub-optimal system requiring specific improvements to  
6  
7 achieve prompt provision of rabies PEP for persons exposed to rabies [113].  
8  
9

10  
11 Statistical modeling studies show that the annual vaccination of 70% of the canine population  
12  
13 would induce adequate herd immunity to effectively eradicate canine rabies and subsequent human  
14  
15 exposure [10, 45]. The lowest and highest reviewed dog vaccination rate was 10% and 67.3%  
16  
17 respectively [10, 47] and no reliable data on dog vaccination were reported in most of the studies.  
18  
19 This is because many campaigns, if conducted, struggle to achieve a 70% vaccination rate [10,  
20  
21 14]. This is due to husbandry practices, rabies knowledge, geographical area/location, and the ages  
22  
23 of dogs [115]. Evidence has shown the dog mass vaccination systems have demonstrated some  
24  
25 effectiveness in reducing human rabies morbidity and mortality in countries such as KwaZulu-  
26  
27 Natal, South Africa [50, 66], Serengeti, Tanzania [50, 67, 69], Malawi [45, 70] and Chad [71, 72].  
28  
29 However, the Tanzanian study has shown that, if vaccine coverage was not sustained, rabies  
30  
31 infection would resurface extremely quickly [35]. Despite effective monitoring of rabies at the  
32  
33 Tanzania study site from 1998 to 2001, vaccine coverage decreased from 2001 to 2003 resulting  
34  
35 in a new rabies outbreak, with human exposures increasing by six times in 2003 relative to previous  
36  
37 years [45]. Further, free mass dog vaccination intervention has proven to increase dog vaccination  
38  
39 coverage. Government and stakeholders work actively to provide a free sustainable dog  
40  
41 vaccination.  
42  
43  
44  
45  
46  
47  
48

49 Besides, the evidence has also illustrated the effectiveness of other strategies, such as mobile phone  
50  
51 touch tracing strategies, new rabies vaccines, integrated bite case management, wound  
52  
53 management were correlated with PEP and/or mass dog vaccination. Africa is yet to recognize  
54  
55  
56  
57  
58  
59

1  
2  
3 rabies as an immediate public health problem; this may be due to a lack of awareness of the burden  
4  
5 of disease and inadequate surveillance. Policies should be put in place to raise awareness of rabies  
6  
7 at grassroots level and coordination between the appropriate agencies for improvements of the  
8  
9 policies [48, 55].  
10  
11

12  
13 The World Animal Health Information System (WAHIS) is a well-established global animal  
14  
15 disease reporting system that reproduces the data submitted by countries to the OIE, but is also  
16  
17 constrained by the under-reporting problems inherent in national reporting systems [116,117]. The  
18  
19 need for regional, One Health-oriented reporting network has therefore become apparent  
20  
21 [118,119]. The development of rabies-specific regional bulletins has been extremely effective in  
22  
23 the Pan-American Health Organization field [118]. The Database such as the New Latin American  
24  
25 Rabies Surveillance System (SIRVERA) should be applicable in Africa.  
26  
27  
28

29  
30  
31 Indeed, the elimination of rabies is not feasible without African cooperation. No single country  
32  
33 will retain rabies-free status unless it is brought under control in neighboring countries [114].  
34  
35 Regionally organized efforts are required to eradicate human rabies, taking into account country-  
36  
37 specific needs and socio-cultural acceptability [114]. Canine-rabies-endemic regions have formed  
38  
39 international rabies networks based on the successful the Meeting of Rabies Program Directors of  
40  
41 the Americas (REDIPRA) model which enables them to create a unified and directed approach  
42  
43 towards elimination within their regions [120]. REDIPRA meetings can be considered a model for  
44  
45 coordination and governance in the world [7, 119, 120]. In Africa, the Pan-African Rabies Control  
46  
47 Network (PARACON) was formed under the secretariat of GARC, as an Africa-focused advisory  
48  
49 and networking initiative [120]. It was established in order to unify all sub-Saharan African  
50  
51 countries and any related rabies networks in a One Health approach towards rabies control and  
52  
53  
54  
55  
56  
57  
58  
59  
60

1  
2  
3 elimination [120]. The PARACON facilitates the development and implementation of national  
4 rabies elimination strategies, with a focus on sustainability through governmental support [120].  
5  
6 However, the probability of meeting the 2030 goal without African and international solidarity is  
7  
8 low, as more than two-thirds of countries are in the low-level human development community  
9  
10 [121]. Leading countries should serve as role models, sharing their knowledge and skills so that  
11  
12 no nation is left behind. African unification with international support will enable, the common  
13  
14 goal of zero human rabies deaths to be achieved by 2030 [121]. Therefore, regional networks  
15  
16 support, channel and pool efforts, support monitoring platforms will help make much progress  
17  
18 [122]. Partnerships are important to the achievement of an objective and the last mile is going to  
19  
20 be the most demanding [122]. In addition, contact and collaboration between human health and  
21  
22 veterinary systems is also critical for the follow-up of both human and animal cases [123]. Data  
23  
24 collected on alleged cases of human rabies, human exposures and rabid animals must be constantly  
25  
26 reviewed and effectively disseminated [123]. Communication between the various national levels  
27  
28 of healthcare administration is a crucial means of disseminating outcomes [123]. Finally,  
29  
30 stakeholders need to be engaged in the long term to ensure that surveillance is effective [123].  
31  
32 Knowing that the Global Strategic Plan is catalytic and not intended to replace the strategies and  
33  
34 commitments of individual countries [122], African countries should emphasize gaps, challenges,  
35  
36 barriers and evidence applicable in the various districts, countries and regions as indicated in this  
37  
38 present study. One Health interventions is provided by approaches to the prevention of human  
39  
40 rabies deaths [124]. In African countries, the Ministry of Health, Animal Resources, Natural  
41  
42 Resources, Environment and Tourism are in charge of implementing the canine and human rabies  
43  
44 programs in accordance with local, national and international bodies.  
45  
46  
47  
48  
49  
50  
51  
52  
53  
54  
55  
56  
57  
58  
59  
60

1  
2  
3 Human rabies is 100% preventable through two complementary measures: first, PEP, which  
4 involves administration of rabies immunoglobulin and a multi-dose course of rabies vaccination  
5 to people bitten by suspected rabid animals; second, mass vaccination of animal reservoirs  
6 (primarily domestic dogs, the reservoir in the vast majority of human cases), which reduces the  
7 risk of human exposure and can ultimately result in rabies virus elimination [124].  
8  
9  
10  
11  
12  
13  
14  
15

16 New rabies control tests and technologies have been developed, such as oral rabies vaccine (ORV)  
17 may be considered as an additional tool for the canine rabies control and elimination. ORV is  
18 effective for instance in skunks, red foxes and raccoons, and lessons have been learned from recent  
19 outbreaks [125]. ORV has been demonstrated to be effective for the oral immunization of foxes,  
20 some of them being competitors for long baits year consumption. Switzerland eradicated wild  
21 rabies since 1985 [123]. However, Strategies to eliminate human rabies in Africa should adapt the  
22 REDIPRA model in African context, which emphasizes that people exposed to rabies have timely  
23 access to quality immunobiologicals, that appropriate levels of vaccination coverage in dogs in  
24 highly enzootic areas are maintained, that national rabies plans are strengthened and that  
25 systematic implementation is ensured, strengthen the surveillance system for human rabies  
26 transmitted by dogs and that national rabies plans are strengthened and that systematic  
27 implementation is ensured, training, and the development of a laboratory quality control system,  
28 particularly in highly enzootic areas, strengthen education, communication and advocacy in  
29 enzootic areas, to ensure the continuous political support that is necessary, develop and adopt a  
30 guide that delineates the requirements for declaring countries or areas free of human dog-  
31 transmitted rabies [120].  
32  
33  
34  
35  
36  
37  
38  
39  
40  
41  
42  
43  
44  
45  
46  
47  
48  
49  
50  
51  
52  
53  
54  
55  
56  
57  
58  
59  
60

## 5. Conclusion

This comprehensive scoping review is of crucial importance in assessing various evidence of human rabies morbidity, mortality, monitoring, prevention and management. Rabies control strategies and case effects, available studies establishment to address various gaps are also important in the management of rabies in Africa. The analysis included past, existing and future viewpoints that are important for African countries to achieve zero dog-transmitted human rabies by 2030. The findings of forty-three studies included thirty-two quantitative retrospective studies, three mixed designs (retrospective and cross-sectional studies), three prospective cohort studies, two cross-sectional studies, one case control, one clinical trial and one randomized control study. Mapping the outcomes, the review included rabies morbidity (21 studies), mortality (15 studies), rabies prevention and control (16 studies), surveillance (9 studies), surveillance and prevention (5 studies), management and control (7 studies), surveillance, prevention and control (6 studies), strong research evidence (14 studies), rabies vaccination or PEP adverse events (4 studies) and research gaps were identified (41 studies).

Evidence has shown that human rabies morbidity and mortality remain high compared to rabies globally, and human rabies morbidity and mortality fluctuate in time and space across different African countries. In order to better understand this, the review has shown that monitoring, prevention and control of rabies diseases is inadequate and insufficient in most African countries. This is attributable to a variety of gaps and challenges across African countries. In addition, this study found insufficient and ineffective surveillance of rabies, unavailability of PEP, high cost, lack of information on prevention of rabies, and poor or non-existent data on dog vaccination. However, few studies have shown a thorough design of rabies measures such as enhanced

1  
2  
3 surveillance of rabies, regulation of rabies in dogs, proper post-exposure treatment, improved  
4 community awareness and availability of PEP in all rural areas, use of cell phone intervention to  
5 enhance surveillance of rabies, prevention and control of enhanced rabies morbidity, and more. In  
6 addition, African countries can learn about different community-based obstacles that can interfere  
7 with surveillance, prevention and control of rabies diseases. This is important to point out that no  
8 single country will preserve rabies-free status unless it is brought under control in neighboring  
9 countries [120]. That is why African countries should build a forum for rabies that may be  
10 significant to exchange data and experience on rabies. Finally, African countries can also look at  
11 futuristic rabies innovations such as ORV.  
12  
13  
14  
15  
16  
17  
18  
19  
20  
21  
22  
23  
24

## 25 **6. Patients and public involvement**

26  
27 No patients or the public were involved in this scoping review.  
28  
29

## 30 **7. List of abbreviations**

31  
32  
33  
34 FBKV: Fetal Bovine Kidney Virus; FAO: Food and Agriculture Organization of the United  
35 Nations; GARC: Global Alliance for Rabies Control; JBI: Joanna Briggs Institute; OIE: World  
36 Organization for Animal Health; ORV: Oral Rabies Vaccine; PARACON: Pan-African Rabies  
37 Control Network; PEP: Post-Exposure Prophylaxis; PICO: Population-Interventions-  
38 Comparisons-Outcomes; PRISMA: Preferred Reporting Items for Systematic Reviews and Meta-  
39 Analysis; RABV: Rabies virus; REDIPRA: Rabies Program Directors of the Americas; RIG:  
40 Rabies Immunoglobulin; SMBV: Suckling Mouse Brain Virus; SIRVERA: New Latin American  
41 Rabies Surveillance System; WAHIS: World Animal Health Information System; V-RG:  
42 Vaccinia-rabies Glycoprotein Recombinant Virus; WHO: World Health Organization;  
43  
44  
45  
46  
47  
48  
49  
50  
51  
52  
53  
54  
55  
56  
57  
58  
59  
60



## 8. Footnotes

**Author Contributions:** PSN initiated the study project. PSN and JLT conducted the data extraction. Both authors wrote the review in consultation with JW, RT, AM, SVN, JLT, LN, NEN, GKH, MTG, AA, SD, RB and CD. All the authors reviewed and approved the final version of the manuscript.

**Funding:** None

**Competing interests:** None declared

**Ethics Approval:** Since this is a scoping review, there is no institutional requirement to obtain ethical clearance from the Health Research Ethics Committee of the Faculty of Medicine and Health Sciences, Stellenbosch University. We used data from open source and publicly available accessed on different databases as described in the methods.

**Data availability statement:** All data relevant to the study are included in the article.

**Consent for publication:** All authors review the manuscript and approved for the submission.

**Acknowledgments:** Not applicable

## 9. References

- 1  
2  
3 1. Nel LH. Discrepancies in data reporting for rabies, Africa. *Emerging infectious diseases*  
4 2013;19(4):529.  
5  
6
- 7  
8  
9 2. albi C, Holmes EC, De Benedictis P, Faye O, Nakoune E, Gamatie D, Diarra A, Elmamy  
10 BO, Sow A, Adjogoua EV and Sangare O. Evolutionary history and dynamics of dog rabies virus  
11 in western and central Africa. *Journal of general virology* 2009; 90(4):783-791.  
12  
13
- 14  
15  
16  
17 3. Nel LH, Rupprecht CE. Emergence of lyssaviruses in the Old World: the case of Africa.  
18 In: *Wildlife and Emerging Zoonotic Diseases: The Biology, Circumstances and Consequences of*  
19 *Cross-Species Transmission*. Springer 2007; 315:161-93.  
20  
21  
22
- 23  
24  
25 4. Hampson K, Coudeville L, Lembo T, Sambo M, Kieffer A, Atflan M, et al. Estimating the  
26 global burden of endemic canine rabies. *PLoS Negl Trop Dis* 2015; 9(4):e0003709.  
27  
28  
29
- 30  
31 5. Desa G, Birasa D, Deneke Y, Oljira D. Assessment of knowledge, attitude and practice  
32 (kap) of community toward rabies in Medawelabu district, bale zone, Ethiopia. *International*  
33 *Journal of Research-Granthaalayah* 2020; 8(3):29-42.  
34  
35  
36
- 37  
38  
39 6. Cleaveland S, Lankester F, Townsend S, Lembo T, Hampson K. Rabies control and  
40 elimination: a test case for One Health. *Veterinary Record* 2014; 175(8):188-93.  
41  
42  
43
- 44  
45 7. World Health Organization. Rabies: rationale for investing in the global elimination of  
46 dog-mediated human rabies. World Health Organization, 2015.  
47 <https://apps.who.int/iris/handle/10665/185195>  
48  
49
- 50  
51  
52  
53 8. Fooks AR, Banyard AC, Horton DL, Johnson N, McElhinney LM, Jackson AC. Current  
54 status of rabies and prospects for elimination. *The lancet* 2014; 384(9951):1389-99.  
55  
56  
57  
58  
59

- 1  
2  
3 9. Knobel DL, Cleaveland S, Coleman PG, Fevre EM, Meltzer MI, Miranda MEG, et al. Re-  
4 evaluating the burden of rabies in Africa and Asia. *Bulletin of the World Health Organization*  
5 2005; 83:360-8.  
6  
7
- 8  
9  
10  
11 10. Lavan RP, King AIM, Sutton DJ, Tunceli K. Rationale and support for a One Health  
12 program for canine vaccination as the most cost-effective means of controlling zoonotic rabies in  
13 endemic settings. *Vaccine* 2017; 35(13):1668-74.  
14  
15
- 16  
17  
18  
19 11. Dodet B, Tejiokem MC, Aguemon AR, Bourhy H. Human rabies deaths in Africa: breaking  
20 the cycle of indifference. *International health* 2015; 7(1):4-6.  
21  
22
- 23  
24  
25 12. Adesina MA, Olufadewa II, OgaH YI, Nwachukwu N. Incidence and Mortality from a  
26 Neglected Tropical Disease (Rabies) in 28 African Countries. *Acta Neuropathologica*  
27 *Communications* 2020; 64(2):46-51.  
28  
29
- 30  
31  
32  
33 13. Interafrican Bureau for Animal Resources. Rabies distribution, 2013. <https://www.aui->  
34 [ibar.org/rabies#Distribution\\_Map\\_for\\_Africa](https://www.aui-ibar.org/rabies#Distribution_Map_for_Africa)  
35  
36
- 37  
38  
39 14. Cleaveland S. Epidemiology and control of rabies: The growing problem of rabies in  
40 Africa. *Transactions of the Royal Society of Tropical Medicine and Hygiene* 1998; 92(2):131-4.  
41  
42
- 43  
44  
45 15. Knobel D and Conan A. Dog Ecology and Rabies Control in Africa *World Small Animal*  
46 *Veterinary Association World Congress Proceedings*. *Age* 2014; 4(9): 23.  
47  
48
- 49  
50  
51 16. Röttcher D and Sawchuk AM. Wildlife rabies in Zambia. *Journal of wildlife diseases* 1978;  
52 14(4): 513-517.  
53  
54  
55  
56  
57  
58  
59  
60

- 1  
2  
3 17. Botros BAM, Salib AW, Mellick PW, Linn JM, Soliman AK, Scott RM. Antigenic  
4 variation of wild and vaccine rabies strains of Egypt. *Journal of medical virology* 1988; 24(2):153-  
5  
6  
7  
8 9.  
9  
10  
11 18. Burrows R. Rabies in African wild dogs of Tanzania. *Journal of wildlife diseases* 1994;  
12  
13 30(2):297-9.  
14  
15  
16  
17 19. Kat PW, Alexander KA, Smith JS, Munson L. Rabies and African wild dogs in Kenya.  
18  
19 *Series B: Biological Sciences* 1995; 262(1364):229-33.  
20  
21  
22  
23 20. Foggin CM. The epidemiological significance of jackal rabies in Zimbabwe. In: *Rabies in*  
24  
25 *the Tropics*. Springer, 1985:399-405.  
26  
27  
28 21. Tefera G, Yimer E and Geyid A. Endemic existence of rabies in Ethiopia. *Ethiopian*  
29  
30 *Medical Journal* 2002; 40(2): 163-10.  
31  
32  
33  
34 22. Nel LH, Sabeta CT, Von Teichman B, Jaftha JB, Rupprecht CE and Bingham J. Mongoose  
35  
36 rabies in southern Africa: a re-evaluation based on molecular epidemiology. *Virus research* 2005,  
37  
38 109(2):165-173.  
39  
40  
41  
42 23. Woodroffe R, Prager KC, Munson L, Conrad PA, Dubovi EJ, Mazet JAK. Contact with  
43  
44 domestic dogs increases pathogen exposure in endangered African wild dogs (*Lycaon pictus*). *PloS*  
45  
46 *one* 2012; 7(1): e30099.  
47  
48  
49  
50 24. Scheepers JL, Venzke KAE. Attempts to reintroduce African wild dogs *Lycaon pictus* into  
51  
52 Etosha National Park, Namibia. *South African Journal of Wildlife Research-24-month delayed*  
53  
54 *open access* 1995; 25(4):138-40.  
55  
56  
57  
58  
59  
60

- 1  
2  
3 25. Kat PW, Alexander KA, Smith JS, Munson L. Rabies and African wild dogs in Kenya.  
4  
5 Proceedings of the Royal Society of London. Series B: Biological Sciences 1995; 262(1364):229-  
6  
7 33.  
8  
9  
10  
11 26. Sabeta C, Ngoepe EC. Controlling dog rabies in Africa: successes, failures and prospects  
12  
13 for the future. *Revue scientifique et technique (International Office of Epizootics)* 2018;  
14  
15 37(2):439-49.  
16  
17  
18  
19 27. Johnson N, Mansfield KL, Marston DA, Wilson C. et al. A new outbreak of rabies in rare  
20  
21 Ethiopian wolves (*Canis simensis*). *Archives of virology* 2010, 155(7): 1175-1177.  
22  
23  
24  
25 28. Marino J, Sillero-Zubiri C, Deressa A Et al. Rabies and distemper outbreaks in smallest  
26  
27 Ethiopian wolf population. *Emerging infectious diseases* 2017, 23(12): 2102.  
28  
29  
30  
31 29. Tomori O. Wild life rabies in Nigeria: experimental infection and transmission studies with  
32  
33 the shrew (*Crocidura* sp.). *Annals of Tropical Medicine & Parasitology* 1980; 74(2):151-6.  
34  
35  
36  
37 30. Ramos J, Melendez N, Reyes F, Gudiso G, Biru D, Fano G, et al. Epidemiology of animal  
38  
39 bites and other potential rabies exposures and anti-rabies vaccine utilization in a rural area in  
40  
41 Southern Ethiopia. *Annals of agricultural and environmental medicine* 2015; 22(1):76-79.  
42  
43  
44  
45 31. Ngugi JN, Maza AK, Omolo OJ, Obonyo M. Epidemiology and surveillance of human  
46  
47 animal-bite injuries and rabies post-exposure prophylaxis, in selected counties in Kenya, 2011-  
48  
49 2016. *BMC public health* 2018; 18(1):996.  
50  
51  
52  
53  
54  
55  
56  
57  
58  
59  
60

- 1  
2  
3 32. Rajeev M, Edosoa G, Hanitriniaina C, Andriamandimby SF, Guis H, Ramiandrasoa R, et  
4 al. Healthcare utilization, provisioning of post-exposure prophylaxis, and estimation of human  
5 rabies burden in Madagascar. *Vaccines* 2019; 37:A35-44.  
6  
7  
8  
9  
10  
11 33. Diallo MK, Dicko A, Richard V, Espie E. Human rabies post exposure prophylaxis at the  
12 Pasteur Institute of Dakar, Senegal: trends and risk factors. *BMC Infectious Diseases* 2019;  
13 19(1):321.  
14  
15  
16  
17  
18  
19 34. Gebru G, Romha G, Asefa A, Hadush H, Biedemariam M. Risk Factors and Spatio-  
20 Temporal Patterns of Human Rabies Exposure in Northwestern Tigray, Ethiopia. *Annals of global*  
21 *health* 2019; 85(1):119.  
22  
23  
24  
25  
26  
27 35. Twabela AT, Mweene AS, Masumu JM, Muma JB, Lombe BP, Hankanga C. Overview of  
28 animal rabies in Kinshasa Province in the Democratic Republic of Congo. *Plos one* 2016;  
29 11(4):e0150403.  
30  
31  
32  
33  
34  
35 36. Tiembre I, Broban A, Benie J, Tetchi M, Druelles S, L'Azou M. Human rabies in Cote  
36 d'Ivoire 2014-2016: Results following reinforcements to rabies surveillance. *PLoS neglected*  
37 *tropical diseases* 2018; 12(9): e0006649.  
38  
39  
40  
41  
42  
43 37. Sofeu CL, Broban A, Njifou NA, Blaise MJ, Sadeuh-Mba S A, Druelles S, et al. Improving  
44 systematic rabies surveillance in Cameroon: A pilot initiative and results for 2014-2016. *Plos*  
45 *neglected tropical diseases* 2018; 12(9):e0006597.  
46  
47  
48  
49  
50  
51 38. Salomão C, Nacima A, Cuamba L, Gujral L, Amiel O, Baltazar C, et al. Epidemiology,  
52 clinical features and risk factors for human rabies and animal bites during an outbreak of rabies in  
53  
54  
55  
56  
57  
58  
59  
60

1  
2  
3 Maputo and Matola cities, Mozambique, 2014: Implications for public health interventions for  
4 rabies control. *Plos neglected tropical diseases* 2017; 11(7):e0005787.  
5  
6

7  
8  
9 39. Punguyire DT, Osei-Tutu A, Aleser EV, Letsa T. Level and pattern of human rabies and  
10 dog bites in Techiman Municipality in the Middle Belt of Ghana: a six year retrospective records  
11 review. *Pan African Medical Journal* 2017. Doi: 10.11604/pamj.2017.28.281.14218  
12  
13

14  
15  
16  
17 40. Pfukenyi DM, Pawandiwa D, Makaya PV, Ushewokunze-Obatolu U. A retrospective study  
18 of wildlife rabies in Zimbabwe, between 1992 and 2003. *Tropical Animal Health and Production*  
19 2009; 41(4):565-72.  
20  
21

22  
23  
24  
25 41. Muyila DI, Aloni MN, Lose-Ekanga MJ, Nzita JM, Kalala-Mbikay A, Bongo HL, et al.  
26 Human rabies: a descriptive observation of 21 children in Kinshasa, the Democratic Republic of  
27 Congo. *Pathogens and global health* 2014; 108(7):317-22.  
28  
29

30  
31  
32  
33 42. Mazigo HD, Okumu FO, Kweka EJ, Mnyone LL. Retrospective analysis of suspected  
34 rabies cases reported at Bugando Referral Hospital, Mwanza, Tanzania. *Journal of global*  
35 infectious diseases 2010; 2(3):216.  
36  
37

38  
39  
40  
41 43. Kubheka V, Govender P, Margot B, Kuonza LR. Dog bites and human rabies in the  
42 Uthungulu District of Kwazulu-Natal province, 2008-2010: a review of surveillance data. *Southern*  
43 African Journal of Epidemiology and Infection 2013; 28(1):33-40.  
44  
45

46  
47  
48  
49 44. Hikufe EH, Freuling CM, Athingo R, Shilongo A, Ndevaetela EE, Helao M, et al. Ecology  
50 and epidemiology of rabies in humans, domestic animals and wildlife in Namibia, 2011-2017. *Plos*  
51 neglected tropical diseases 2019; 13(4):e0007355.  
52  
53

- 1  
2  
3 45. Hampson K, Dobson A, Kaare M, Dushoff J, Magoto M, Sindoya E, et al. Rabies  
4 exposures, post-exposure prophylaxis and deaths in a region of endemic canine rabies. *PloS Negl*  
5 *Trop Dis* 2008; 2(11):e339.  
6  
7  
8  
9  
10  
11 46. Deressa A, Ali A, Bayene M, Selassie BN, Yimer E, Hussen K. The status of rabies in  
12 Ethiopia: A retrospective record review. *Ethiopian Journal of Health Development* 2010;  
13 24(2):127-132.  
14  
15  
16  
17  
18  
19 47. Andriamandimby SF, Heraud Jean-Michel, Ramiandrasoa R, Ratsitorahina M,  
20 Rasambainarivo JH, Dacheux L, et al. Surveillance and control of rabies in La Reunion, Mayotte,  
21 and Madagascar. *Veterinary Research* 2013; 44(1):1-9.  
22  
23  
24  
25  
26  
27 48. Alabi O, Nguku P, Chukwukere S, Gaddo A, Nsubuga P, Umoh J. Profile of dog bite  
28 victims in Jos Plateau State, Nigeria: a review of dog bite records (2006-2008). *The Pan African*  
29 *medical journal* 2014; 18(Suppl 1):12.  
30  
31  
32  
33  
34  
35 49. Adomako BY, Baiden F, Sackey S, Ameme DK, Wurapa F, Nyarko KM, et al. Dog bites  
36 and rabies in the eastern region of Ghana in 2013-2015: a call for a one-health approach. *Journal*  
37 *of tropical medicine* 2018; 2018:5 pages  
38  
39  
40  
41  
42  
43 50. Athingo R, Tenzin T, Shilongo A, Hikufe E, Shoombe KK, Khaiseb S, et al. Fighting Dog-  
44 Mediated Rabies in Namibia-Implementation of a Rabies Elimination Program in the Northern  
45 Communal Areas. *Tropical Medicine and Infectious Diseases* 2020; 5(1):12.  
46  
47  
48  
49  
50  
51 51. Muller T, Demetriou P, Moynagh J, Cliquet F, Fooks AR, Conraths FJ, et al. Rabies  
52 elimination in Europe: a success story. In: *In Rabies control: towards sustainable prevention at the*  
53  
54  
55  
56  
57  
58  
59  
60



1  
2  
3 source, compendium of the OIE, Global conf. on Rabies Control, Incheon-Seoul, 7-9 September  
4  
5 2011. 2012:31-44.  
6

7  
8  
9 52. Velasco-Villa A, Escobar LE, Sanchez A, Shi M, Streicker DG, Gallardo-Romero NF, et  
10  
11 al. Successful strategies implemented towards the elimination of canine rabies in the Western  
12  
13 Hemisphere. *Antiviral research* 2017; 143:1-12.  
14

15  
16  
17 53. World Health Organization. WHO Expert Consultation on Rabies: second report. World  
18  
19 Health Organization, 2013. <https://apps.who.int/iris/handle/10665/85346>  
20

21  
22  
23 54. Dodet B. The fight against rabies in Africa: From recognition to action. *Vaccine* 2009;  
24  
25 27(37):5027-32.  
26

27  
28  
29 55. Kayali U, Mindekem R, Yemadji N, Vounatsou P, Kanninga Y, Ndoutamia AG, et al.  
30  
31 Coverage of pilot parenteral vaccination campaign against canine rabies in N'Djamena, Chad.  
32  
33 *Bulletin of the World Health Organization* 2003; 81:739-44.  
34

35  
36  
37 56. Franka R, Smith TG, Dyer JL, Wu X, Niezgodna M, Rupprecht CE. Current and future tools  
38  
39 for global canine rabies elimination. *Antiviral research* 2013; 100(1):220-5.  
40

41  
42  
43 57. Zemanova S, Korytar L, Benko Z, Prokes M, Ondrejtkova A. Ecological Factors of  
44  
45 Transmission, Persistence and Circulation of Pathogens In Bat Populations. *Folia Veterinaria*  
46  
47 2019; 63(1):32-40.  
48

49  
50  
51 58. Hampson K, Dushoff J, Cleaveland S, Haydon DT, Kaare M, Packer C and Dobson A.  
52  
53 Transmission dynamics and prospects for the elimination of canine rabies. *PLoS boil* 2009; 7(3):  
54  
55 e1000053.  
56

- 1  
2  
3 59. Minyoo AB, Steinmetz M, Czupryna A, Bigambo M, Mzimhiri I, Powell G, Gwakisa P  
4 and Lankester F. Incentives increase participation in mass dog rabies vaccination clinics and  
5 methods of coverage estimation are assessed to be accurate. PLoS neglected tropical diseases  
6 2015; 9(12): e0004221.  
7  
8  
9  
10  
11  
12  
13 60. Lankester F, Davis A, Kinung'hi S, Yoder J, Bunga C, Alkara S, Mzimhiri I, Cleaveland  
14 S and Palmer GH. An integrated health delivery platform, targeting soil-transmitted helminths  
15 (STH) and canine mediated human rabies, results in cost savings and increased breadth of  
16 treatment for STH in remote communities in Tanzania. BMC public health 2019; 19(1): 1398.  
17  
18  
19  
20  
21  
22  
23 61. Global Alliance for Rabies Control. Recent Research November 2017, 2017.  
24 <https://rabiesalliance.org/resource/recent-research-november-2017>  
25  
26  
27  
28  
29 62. MEEREB. Rabies diagnostic and epidemiological data, 2018. <https://www.fondation-merieux.org/wp-content/uploads/2017/11/4th-meereb-2018-florence-cliquet.pdf>  
30  
31  
32  
33  
34 63. Wallace RM, Mehal J, Nakazawa Y, Recuenco S, Bakamutumaho B, Osinubi M, et al. The  
35 impact of poverty on dog ownership and access to canine rabies vaccination: results from a  
36 knowledge, attitudes and practices survey, Uganda 2013. Infectious diseases of poverty 2017;  
37 6(1):97.  
38  
39  
40  
41  
42  
43  
44  
45 64. Jibat T, Hogeveen H and Mourits MC. Review on dog rabies vaccination coverage in  
46 Africa: a question of dog accessibility or cost recovery? PLoS Negl Trop Dis 2015, 9(2):  
47 e0003447.  
48  
49  
50  
51  
52  
53  
54  
55  
56  
57  
58  
59  
60

- 1  
2  
3 65. Shwiff SA, Hatch B, Anderson A, Nel LH, Leroux K, Stewart D, et al. Towards Canine  
4 Rabies Elimination in KwaZulu-Natal, South Africa: Assessment of Health Economic Data.  
5  
6 Transboundary and emerging diseases 2016; 63(4):408-15.  
7  
8  
9  
10  
11 66. Cleaveland S, Kaare M, Tiringa P, Mlengeya T, Barrat J. A dog rabies vaccination  
12 campaign in rural Africa: impact on the incidence of dog rabies and human dog-bite injuries.  
13  
14 Vaccine 2003; 21(17-18):1965-73.  
15  
16  
17  
18  
19 67. Kaare M, Lembo T, Hampson K, Ernest E, Estes A, Mentzel C, et al. Rabies control in  
20 rural Africa: evaluating strategies for effective domestic dog vaccination. 2009; 27(1):152-60.  
21  
22  
23  
24  
25 68. Hatch B, Anderson A, Sambo M, Maziku M, Mchau G, Mbunda E, et al. Towards Canine  
26 Rabies Elimination in Southern Eastern Tanzania: Assessment of Health Economic Data.  
27  
28 Transboundary and emerging diseases 2017; 64(3):951-8.  
29  
30  
31  
32  
33 69. Gibson AD, Handel IG, Shervell K, Roux T, Mayer D, Muyila S et al. The Vaccination of  
34 35,000 Dogs in 20 Working Days Using Combined Static Point and Door-to-Door Methods in  
35  
36 Blantyre, Malawi. PLoS neglected tropical diseases 2016; 10(7):e0004824.  
37  
38  
39  
40  
41 70. Léchenne M, Oussiguere, A Naissengar K, Mindekem, R, Mosimann L, Rives, G,  
42 Hattendorf, Moto DD, Alfaroukh IO and Zinsstag J. Operational performance and analysis of two  
43  
44 rabies vaccination campaigns in N'Djamena, Chad. Vaccine 2016; 34(4): 571-577.  
45  
46  
47  
48  
49 71. Anyiam F, Léchenne M, Mindekem R et al. Cost estimate of canine rabies elimination by  
50  
51 parenteral mass vaccination in Chad, 2017.  
52  
53  
54 [https://edoc.unibas.ch/57353/1/Lechenne\\_thesis\\_edoc%20version.pdf](https://edoc.unibas.ch/57353/1/Lechenne_thesis_edoc%20version.pdf)  
55  
56  
57  
58  
59  
60

- 1  
2  
3 72. Zinsstag J, Lechenne M, Laager M, Mindekem R, Oussiguere A, Bidjeh K, et al.  
4  
5 Vaccination of dogs in an African city interrupts rabies transmission and reduces human exposure.  
6  
7 Science translational medicine 2017; 9(421):eaaf6984.  
8  
9  
10  
11 73. Sreenivasan N, Li A, Shiferaw M, Tran CH, Wallace R, Blanton J, et al. Overview of rabies  
12  
13 post-exposure prophylaxis access, procurement and distribution in selected countries in Asia and  
14  
15 Africa, 2017-2018. *Vaccine* 2019; 37: A6-A13.  
16  
17  
18  
19 74. World Health Organization. 2016: the beginning of the end of rabies? 2016.  
20  
21 [https://www.who.int/rabies/resources/tlgh\\_rabies\\_oct\\_2016/en/](https://www.who.int/rabies/resources/tlgh_rabies_oct_2016/en/)  
22  
23  
24  
25 75. Bogel K, Motschwiller E. Incidence of rabies and post-exposure treatment in developing  
26  
27 countries. *Bulletin of the World Health Organization* 1986; 64(6):883.  
28  
29  
30  
31 76. Taylor LH, Knopf L, Partners for Rabies Prevention. Surveillance of human rabies by  
32  
33 national authorities-a global survey. *Zoonoses and public health* 2015; 62(7):543-52.  
34  
35  
36  
37 77. Kamani TM, Kazwala R, Mfinanga S, Haydon D, Keyyu J, et al. One Health: a concept  
38  
39 led by Africa, with global benefits. *The Veterinary Record* 2015; 176(19): 496.  
40  
41  
42  
43 78. Acharya KP, Acharya N, Phuyal S, Upadhyaya M and Steven L. One-health approach: A  
44  
45 best possible way to control rabies. *One Health* 2020; 10: 100161.  
46  
47  
48  
49 79. Otu, A., Effa, E., Meseko, C. *et al.* Africa needs to prioritize One Health approaches that  
50  
51 focus on the environment, animal health and human health. *Nat Med* (2021).  
52  
53 <https://doi.org/10.1038/s41591-021-01375-w>  
54  
55  
56  
57  
58  
59  
60

- 1  
2  
3 80. Jarvis S. Aiming for elimination of dog-mediated human rabies cases by 2030. *Veterinary*  
4  
5 *Record* 2016; 178:86-7.  
6  
7  
8  
9 81. Tricco AC, Lillie E, Zarin W, O'Brien KK, Colquhoun H, Levac D, et al. PRISMA  
10  
11 extension for scoping reviews (PRISMA-ScR): checklist and explanation. *Annals of internal*  
12  
13 *medicine* 2018; 169(7):467-73.  
14  
15  
16  
17 82. Peters MDJ, Godfrey CM, Khalil H, McInerney P, Parker D, Soares CB. Guidance for  
18  
19 conducting systematic scoping reviews. *International journal of evidence-based healthcare*  
20  
21 2015;13(3):141-6.  
22  
23  
24  
25 83. Arksey H, O'Malley L. Scoping studies: towards a methodological framework.  
26  
27 *International journal of social research methodology* 2005;8(1):19-32.  
28  
29  
30  
31 84. Tricco AC, Lillie E, Zarin W, O'Brien K, Colquhoun H, Kastner M, et al. A scoping review  
32  
33 on the conduct and reporting of scoping reviews. *BMC medical research methodology* 2016;  
34  
35 16(1):15.  
36  
37  
38  
39 85. Edward FD, Osei-Tutu A, Gbeddy K, Quist C. A retrospective study of rabies cases at  
40  
41 Techiman Municipal, Ghana, 2009-2012. *International Journal of Infectious Diseases* 2014;  
42  
43 21:179.  
44  
45  
46  
47 86. Kardjadj M, Yahiaoui F, Ben-Mahdi MH. Incidence of human dog-mediated zoonoses and  
48  
49 demographic characteristics/vaccination coverage of the domestic dog population in Algeria. *Rev.*  
50  
51 *Sci., Tech. Off. Int. Epiz* 2019;38(3):000-000.  
52  
53  
54  
55  
56  
57  
58  
59  
60

- 1  
2  
3 87. Reynes JM, Andriamandimby SF, Razafitrimo GM, Razainirina J, Jeanmaire EM, Bourhy  
4 H, et al. Laboratory surveillance of rabies in humans, domestic animals, and bats in madagascar  
5 from 2005 to 2010. *Advances in preventive medicine* 2011; 2011:6.  
6  
7 <https://doi.org/10.4061/2011/727821>  
8  
9  
10  
11  
12  
13 88. Nyakarahuka L, Tweheyo R. Occurrence and mortality rates from rabies in Uganda, 2001-  
14 2009. *International journal of infectious Diseases* 2012; 16:e458.  
15  
16  
17  
18  
19 89. Masiira B, Makumbi I, Matovu JKB, Ario AR, Nabukenya I, Kihembo C, et al. Long term  
20 trends and spatial distribution of animal bite injuries and deaths due to human rabies infection in  
21 Uganda, 2001-2015. *PloS one* 2018;13(8):e0198568.  
22  
23  
24  
25  
26  
27 90. Sambo M, Cleaveland S, Ferguson H, Lembo T, Simon C, Urassa H, et al. The burden of  
28 rabies in Tanzania and its impact on local communities. *Plos Negl Trop Dis* 2013;7(11): e2510.  
29  
30  
31  
32  
33 91. Mtema Z, Changalucha J, Cleaveland S, Elias M, Ferguson HM, Halliday JE, et al. Mobile  
34 phones as surveillance tools: implementing and evaluating a large-scale intersectoral surveillance  
35 system for rabies in Tanzania. *Plos medicine* 2016;13(4): e1002002.  
36  
37  
38  
39  
40  
41 92. Teklu GG, Hailu TG, Eshetu GR. High incidence of human rabies exposure in  
42 northwestern tigray, Ethiopia: A four-year retrospective study. *Plos neglected tropical diseases*  
43 2017; 11(1):e0005271.  
44  
45  
46  
47  
48  
49 93. Zimmer BL, Gamble L, Foster R, Kennedy N, Mayer D, Bailey J Burdon, et al. Assessment  
50 of the impact on paediatric rabies at Queen Elizabeth Central Hospital, Blantyre, Malawi,  
51  
52  
53  
54  
55  
56  
57  
58  
59  
60

1  
2  
3 following a mass canine rabies vaccination programme. *International Journal of Infectious*  
4  
5 *Diseases* 2019; 79:64.  
6

7  
8  
9 94. Osaghae DO. Animal and human bites in children. *West African journal of medicine* 2011;  
10  
11 30(6):421-424.  
12

13  
14  
15 95. Ogundare EO, Olatunya OS, Oluwayemi IO, Inubile AJ, Taiwo AB, Agaja OT, et al.  
16  
17 Pattern and outcome of dog bite injuries among children in Ado-Ekiti, Southwest Nigeria. *Pan*  
18  
19 *African Medical Journal* 2017; 27:81.  
20

21  
22  
23 96. Abubakar SA, Bakari AG. Incidence of dog bite injuries and clinical rabies in a tertiary  
24  
25 health care institution: a 10-year retrospective study. *Annals of African medicine* 2012; 11(2):108-  
26  
27 11  
28

29  
30  
31 97. Kent SJW, Naicker B, Wood DR. Demographics and management of dog-bite victims at a  
32  
33 level two hospital in KwaZulu-Natal. *South African Medical Journal* 2012; 102(11):845-7.  
34

35  
36  
37 98. De Nardo P, Gentilotti E, Vairo F, Nguhuni B, Chaula Z, Nicastri E, et al. A retrospective  
38  
39 evaluation of bites at risk of rabies transmission across 7 years: The need to improve surveillance  
40  
41 and reporting systems for rabies elimination. *PloS one* 2018;13(7): e0197996.  
42

43  
44  
45 99. Lushasi K, Steenson R, Bernard J, Changalucha JJ, Govella NJ, Haydon DT, et al. One  
46  
47 Health in practice: using Integrated Bite Case Management to increase detection of rabid animals  
48  
49 in Tanzania. *Frontiers in Public health* 2020; 8:13.  
50

- 1  
2  
3 100. Changalucha J, Steenson R, Grieve E, Cleaveland S, Lembo T, Lushasi K, et al. The need  
4 to improve access to rabies post-exposure vaccines: Lessons from Tanzania. *Vaccine* 2019;37:  
5 A45-53.  
6  
7  
8  
9  
10  
11 101. Yizengaw E, Getahun T, Mulu W, Ashagrie M, Abdela I, Geta M. Incidence of human  
12 rabies virus exposure in northwestern Amhara, Ethiopia. *BMC infectious diseases* 2018; 18(1):1-  
13 7.  
14  
15  
16  
17  
18  
19 102. Jemberu WT, Molla W, Almaw G, Alemu S. Incidence of rabies in humans and domestic  
20 animals and people's awareness in North Gondar Zone, Ethiopia. *Plos Negl Trop Dis* 2013;7(5):  
21 e2216.  
22  
23  
24  
25  
26  
27 103. Fevre EM, Kaboyo RW, Persson V, Edelsten M, Coleman PG, Cleaveland S. The  
28 epidemiology of animal bite injuries in Uganda and projections of the burden of rabies. *Tropical*  
29 *medicine & international health* 2005; 10(8):790-8.  
30  
31  
32  
33  
34  
35 104. Frey J, Mindekem R, Kessely H, Doumagoum MD, Naissengar S, Zinsstag J, et al. Survey  
36 of animal bite injuries and their management for an estimate of human rabies deaths in N'Djamena,  
37 Chad. *Tropical Medicine & International Health* 2013; 18(12):1555-62.  
38  
39  
40  
41  
42  
43 105. Olugasa BO, Odeniyi AO, Adeogun AO, Adeola OA. Antibody levels against rabies  
44 among occupationally exposed individuals in a Nigerian University. *Vet Ital* 2010; 46(1):21-8.  
45  
46  
47  
48  
49 106. Harry TO, Adeiga A, Anyiwo CE and Nasidi A. Anti-rabies treatment of dog-bite victims  
50 in Lagos, Nigeria: trial of suckling mouse brain and fetal bovine kidney cell vaccines. *vaccine*  
51 1984; 4: 257-260.  
52  
53  
54  
55  
56  
57  
58  
59  
60



1  
2  
3 107. World Health Organization Technical Report Series. WHO expert consultation on rabies,  
4  
5 2005.

6  
7  
8 [https://apps.who.int/iris/bitstream/handle/10665/85346/9789240690943\\_eng.pdf?sequence=1](https://apps.who.int/iris/bitstream/handle/10665/85346/9789240690943_eng.pdf?sequence=1)  
9

10  
11 108. World Health Organization. WHO Expert Consultation on Rabies-World  
12  
13 Health. [https://apps.who.int/iris/bitstream/handle/10665/85346/9789241209823\\_eng.pdf?sequenc](https://apps.who.int/iris/bitstream/handle/10665/85346/9789241209823_eng.pdf?sequence=1)  
14  
15 e=1  
16

17  
18  
19 109. Ren J, Yao L, Sun J and Gong Z. Zagreb regimen, an abbreviated intramuscular schedule  
20  
21 for rabies vaccination. *Clinical and Vaccine Immunology* 2015; 22(1):1-5  
22

23  
24  
25 110. Banyard AC, Horton DL, Freuling C, Müller T. and Fooks AR. Control and prevention of  
26  
27 canine rabies: the need for building laboratory-based surveillance capacity. *Antiviral Research*  
28  
29 2013; 98(3): 357-364.  
30

31  
32  
33 111. Kirby JD, Chipman RB, Nelson KM, Rupprecht CE, Blanton JD, Algeo TP, et al. Enhanced  
34  
35 Rabies Surveillance to Support Effective Oral Rabies Vaccination of Raccoons in the Eastern  
36  
37 United States. *Tropical medicine and infectious disease* 2017; 2(3):34.  
38

39  
40  
41 112. Wilde H, Ghai S, Hemachudha T. Rabies: Still a silent killer targeting the poor. *Vaccine*  
42  
43 2017; 35(18):2293.  
44

45  
46  
47 113. Wambura G, Mwatondo A, Muturi M, Nasimiyu C, Wentworth D, Hampson K, et al.  
48  
49 Rabies vaccine and immunoglobulin supply and logistics: challenges and opportunities for rabies  
50  
51 elimination in Kenya. *Vaccine* 2019; 37: A28-34.  
52

- 1  
2  
3 114. World Health Organization. WHO expert consultation on rabies: third report. 1012 edition.  
4  
5 World Health Organization, 2018.  
6  
7  
8  
9 115. Hergert M, Le Roux K and Nel LH. Risk factors associated with nonvaccination rabies  
10 status of dogs in KwaZulu-Natal, South Africa. *Veterinary Medicine: Research and Reports* 2016,  
11 7: 75.  
12  
13  
14  
15  
16 116. Taylor LH, Hampson K, Fahrion A, Abela-Ridder B, Nel LH. Difficulties in estimating the  
17 human burden of canine rabies. *Acta Tropica* 2017; 165:133-40.  
18  
19  
20  
21  
22 117. Scott Terence P, Coetzer Andre, Fahrion Anna S, Nel Louis H. Addressing the Disconnect  
23 between the Estimated, Reported, and True Rabies Data: The Development of a Regional African  
24 Rabies Bulletin. *Frontiers in veterinary science* 2017; 4:18.  
25  
26  
27  
28  
29  
30 118. Scott TP, Coetzer A, De Balogh K, Wright N and Nel LH. The Pan-African Rabies Control  
31 Network (PARACON): A unified approach to eliminating canine rabies in Africa. *Antiviral*  
32 *research* 2015; 124: 93-100.  
33  
34  
35  
36  
37  
38 119. Gongal G, Wright AE. Human rabies in the WHO Southeast Asia Region: forward steps  
39 for elimination. *Advances in Preventive Medicine* 2011. <https://doi.org/10.4061/2011/383870>  
40  
41  
42  
43  
44 120. Vigilato MAN, Molina-Flores B, Del Rio Vilas VJ, Pompei JC, Cosivi O. Canine rabies  
45 elimination: governance principles. *Rev Sci Tech.* 2018; 37(2):703-709.  
46  
47  
48  
49  
50 121. Mbilo C, Coetzer A, Bonfoh B, Angot A, Bebay C, Cassama B, et al. Dog rabies control  
51 in West and Central Africa: A review. *Acta Tropica* 2020; 105459.  
52  
53  
54  
55  
56  
57  
58  
59  
60

- 1  
2  
3 122. World Health Organization. Driving progress towards rabies elimination. In:  
4 <file:///C:/Users/Staff/Downloads/WHO-CDS-NTD-NZD-2019.04-eng.pdf>. 2019.  
5  
6  
7  
8  
9 123. Broban A, Tejiokem MC, Tiembre I, Druelles S, L'Azou M. Bolstering human rabies  
10 surveillance in Africa is crucial to eliminating canine-mediated rabies. PloS neglected tropical  
11 diseases 2018; 12(9): e0006367.  
12  
13  
14  
15  
16  
17 124. Cleaveland S, Sharp J, Abela-Ridder B, Allan KJ, Buza J, Crump JA, Davis A, Del Rio  
18 Vilas, VJ, De Glanville WA, Kazwala RR and Kibona T. One Health contributions towards more  
19 effective and equitable approaches to health in low-and middle-income countries. Philosophical  
20 Transactions of the Royal Society B: Biological Sciences 2017; 372(1725): 20160168.  
21  
22  
23  
24  
25  
26  
27 125. Tataryn J, Buck P A. The Canadian Rabies Management Plan: An integrated approach to  
28 the coordination of rabies activities in Canada. Canada communicable disease report 2016; 42  
29 (6):135-6.  
30  
31  
32  
33  
34  
35  
36  
37  
38  
39  
40  
41  
42  
43  
44  
45  
46  
47  
48  
49  
50  
51  
52  
53  
54  
55  
56  
57  
58  
59  
60

1  
2  
3 **Figure legend/caption**  
4

5 **Figure 1:** Human rabies distribution in thirty-two African countries (2011)  
6

7 **Figure 2:** Flow diagram of human rabies mortality and morbidity associated with animal bites in  
8 Africa.  
9

10  
11 **Figure 3:** Distribution of forty-three studies in African countries.  
12  
13  
14  
15  
16  
17  
18  
19  
20  
21  
22  
23  
24  
25  
26  
27  
28  
29  
30  
31  
32  
33  
34  
35  
36  
37  
38  
39  
40  
41  
42  
43  
44  
45  
46  
47  
48  
49  
50  
51  
52  
53  
54  
55  
56  
57  
58  
59  
60

1  
2  
3  
4  
5  
6  
7  
8  
9  
10  
11  
12  
13  
14  
15  
16  
17  
18  
19  
20  
21  
22  
23  
24  
25  
26  
27  
28  
29  
30  
31  
32  
33  
34  
35  
36  
37  
38  
39  
40  
41  
42  
43  
44  
45  
46  
47  
48  
49  
50  
51  
52  
53  
54  
55  
56  
57  
58  
59  
60

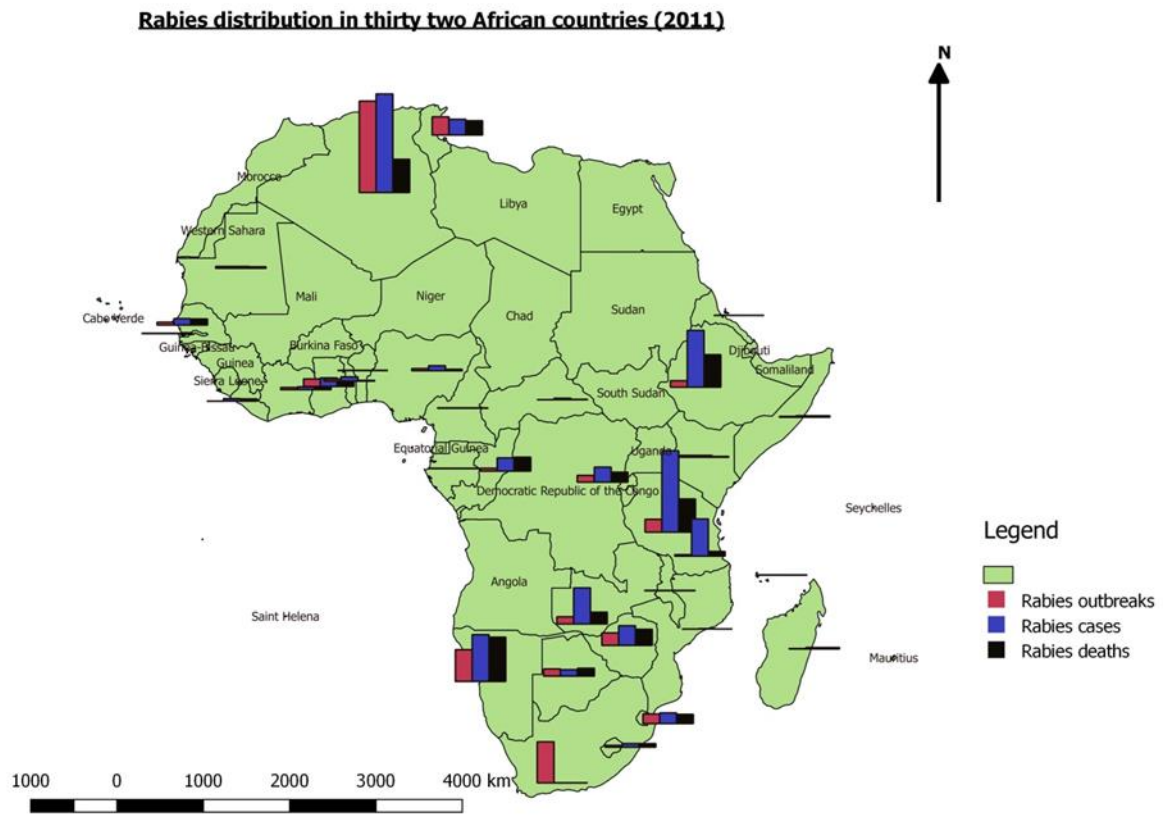

Figure 1: Human rabies distribution in thirty-two African countries (2011)

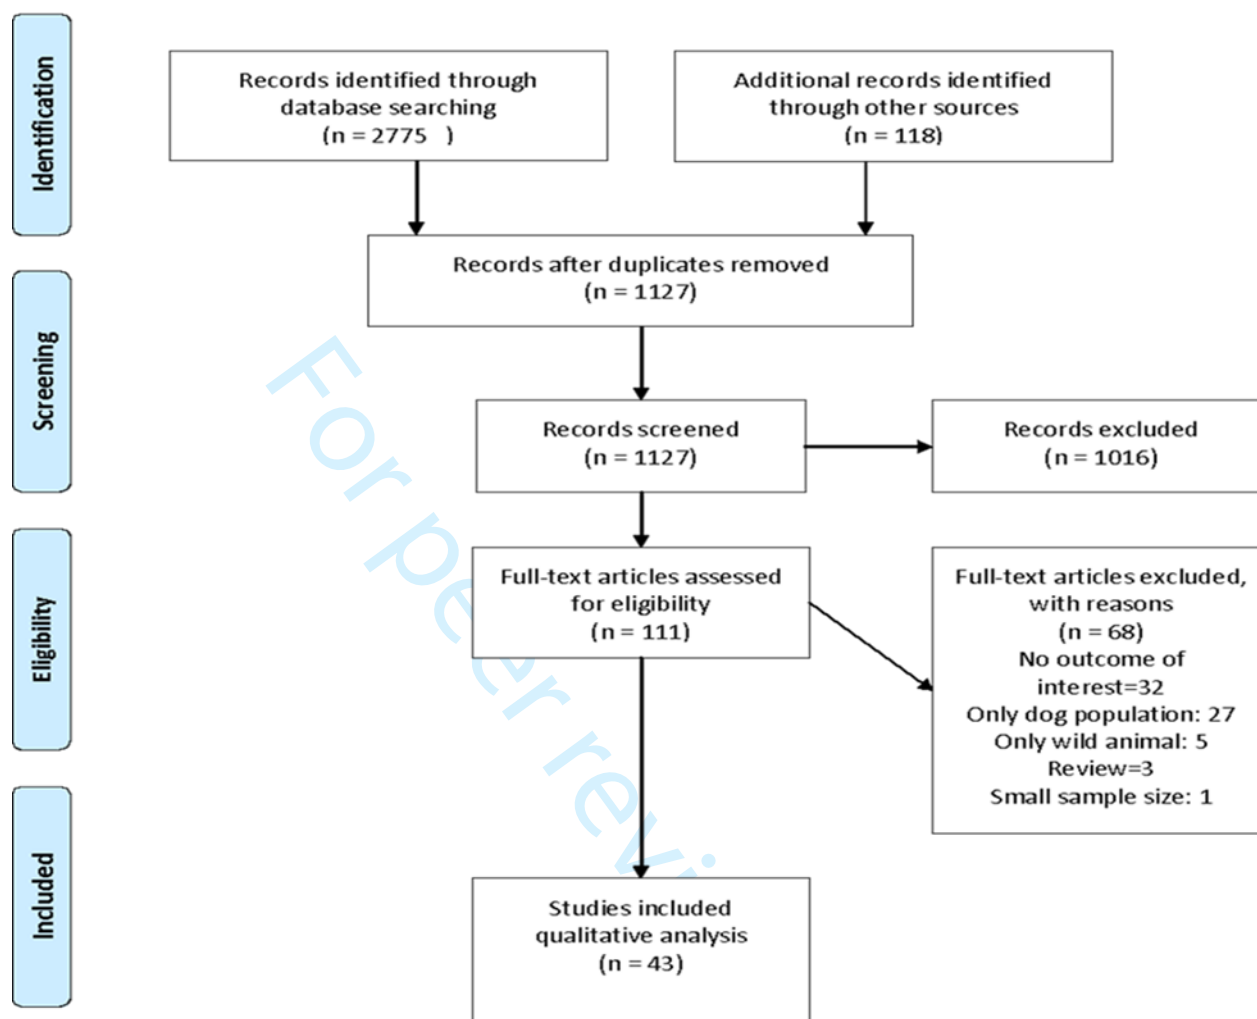

42 Figure 2: Flow diagram of human rabies mortality and morbidity associated with animal bites  
43 in Africa. Note From PRISMA: [www.prisma-statement.org](http://www.prisma-statement.org) [81]  
44  
45  
46  
47  
48  
49  
50  
51  
52  
53  
54  
55  
56  
57  
58  
59  
60

1  
2  
3  
4  
5  
6  
7  
8  
9  
10  
11  
12  
13  
14  
15  
16  
17  
18  
19  
20  
21  
22  
23  
24  
25  
26  
27  
28  
29  
30  
31  
32  
33  
34  
35  
36  
37  
38  
39  
40  
41  
42  
43  
44  
45  
46  
47  
48  
49  
50  
51  
52  
53  
54  
55  
56  
57  
58  
59  
60

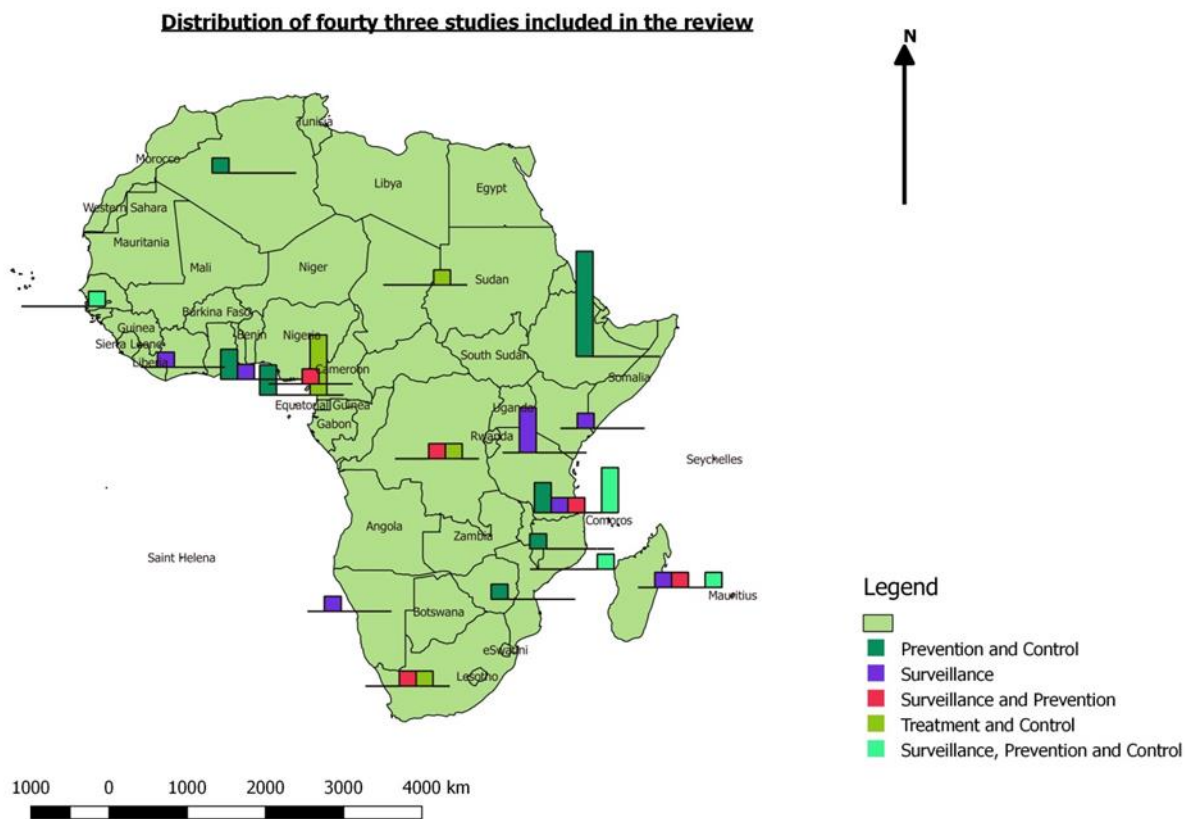

Figure 3: Distribution of forty-three studies in African countries.

## Supplementary material 1

### Search Strategy:

Database: Ovid MEDLINE(R) and Epub Ahead of Print, In-Process & Other Non-Indexed Citations, Daily and Versions(R) <1946 to May 25, 2020>

---

- 1 exp rabies/ or exp Rabies virus/ or rabies.mp.
- 2 africa\*.mp. or exp Africa/
- 3 (Algeria or Angola or Benin or Botswana or Burkina Faso or Burundi or Cameroon or Cape Verde or "Central African republic" or Chad or Comoros or Congo or "Democratic Republic of Congo" or DRC or Djibouti or Equatorial guinea or Egypt or Eritrea or Ethiopia or Gabon or Gambia or Ghana or Guinea or Bissau or Ivory coast or "Cote d ivoire" or Jamahiriya or Kenya or Lesotho or Liberia or Libya or Madagascar or Malawi or Mali or Mauritania or Mauritius or Mayotte or Morocco or Mozambique or Namibia or Niger or Nigeria or Principe or Reunion or Rhodesia or Rwanda or "Sao Tome" or Senegal or Seychelles or "Sierra Leone" or Somalia or "South Africa" or "St Helena" or Sudan or Swaziland or Tanzania or Togo or Tunisia or Uganda or Zaire or Zambia or Zimbabwe or "Central Africa" or "West Africa" or "East Africa" or "Southern Africa" or South Africa).mp.
- 4 2 or 3
- 5 1 and 4
- 6 mortality/ or mortality.mp.
- 7 fatality.mp.
- 8 morbidity.mp. or Morbidity/
- 9 surveillance.mp. or Population Surveillance/
- 10 (vaccine or vaccines).mp. or Vaccination/
- 11 6 or 7 or 8 or 9 or 10
- 12 Rabies Vaccines/
- 13 5 and 11
- 14 4 and 12



1  
2  
3  
4  
5  
6  
7  
8  
9  
10  
11  
12  
13  
14  
15  
16  
17  
18  
19  
20  
21  
22  
23  
24  
25  
26  
27  
28  
29  
30  
31  
32  
33  
34  
35  
36  
37  
38  
39  
40  
41  
42  
43  
44  
45  
46  
47  
48  
49  
50  
51  
52  
53  
54  
55  
56  
57  
58  
59  
60

15 13 or 14  
16 limit 15 to english language

For peer review only

Supplementary Table 1: Extracting and charting data table

| Author(year) and country      | Study designs            | Participants/Comparators             | Interventions and Control conditions/Exposures                                                                               | Outcomes                                                                                                                                                                                                                                   | Key findings/Gaps/Challenges                                                     |
|-------------------------------|--------------------------|--------------------------------------|------------------------------------------------------------------------------------------------------------------------------|--------------------------------------------------------------------------------------------------------------------------------------------------------------------------------------------------------------------------------------------|----------------------------------------------------------------------------------|
| Rabies prevention and control |                          |                                      |                                                                                                                              |                                                                                                                                                                                                                                            |                                                                                  |
| Harry 1984<br>Nigeria         | Randomized control trial | 136 patients aged three to 74 years. | Controlled treatment of dog-bite victims with suckling mouse brain (SMBV) versus fetal bovine kidney (FBKV) rabies vaccines. | By day 7, 26.7% of SMBV recipients and 28.6% of FBKV recipients showed antibody response<br><br>These percentages increased to 95.1 and 81.1, respectively, by day 14, and by day 20 (for SMBV recipients) or day 30 (FBKV recipients) the | We have concluded that both vaccines are equally efficacious and well tolerated. |

|                                  |                                   |                                                       |                                                                                         |                                                                                                                                                                                               |                                                                                                                                                                                                                                      |
|----------------------------------|-----------------------------------|-------------------------------------------------------|-----------------------------------------------------------------------------------------|-----------------------------------------------------------------------------------------------------------------------------------------------------------------------------------------------|--------------------------------------------------------------------------------------------------------------------------------------------------------------------------------------------------------------------------------------|
|                                  |                                   |                                                       |                                                                                         | <p>response was 100%.</p> <p>Titres dropped by day 90, but in no case to below 1 EU ml<sup>-1</sup></p>                                                                                       |                                                                                                                                                                                                                                      |
| <p>Tefera 2002<br/>Ethiopia</p>  | <p>5-year retrospective study</p> | <p>15,940 people dog bite victims</p>                 | <p>post exposure anti-rabies prophylaxis treatment</p>                                  | <p>320 people were reported to have died of rabies.</p>                                                                                                                                       | <p>The result supports the hypothesis that there is a lack of appropriate reporting system on prevalence of rabies and its impact on humans.</p>                                                                                     |
| <p>Deressa 2010<br/>Ethiopia</p> | <p>8-year retrospective study</p> | <p>17,204 people received post exposure treatment</p> | <p>Post Exposure Prophylaxis</p> <p>5% suspension of phenolized sheep brain tissue.</p> | <p>The fatal human cases were 386 humans with annual range of 35 to 58. The age and sex specific distribution showed that the most fatal cases were 42% from the age-group 0-14 category.</p> | <p>PEP against rabies varies from 35.96% to 64.4% across the study.</p> <p>The recorded data showed the underestimate of rabies diagnosis, post exposure prophylaxis and fatal human cases, which could be attributed due to the</p> |

1  
2  
3  
4  
5  
6  
7  
8  
9  
10  
11  
12  
13  
14  
15  
16  
17  
18  
19  
20  
21  
22  
23  
24  
25  
26  
27  
28  
29  
30  
31  
32  
33  
34  
35  
36  
37  
38  
39  
40  
41  
42  
43  
44  
45  
46

|                         |                              |                                                                                                                                                          |                                                                                                                                                                                                                                                              |                                                                               |                                                                                                                                 |
|-------------------------|------------------------------|----------------------------------------------------------------------------------------------------------------------------------------------------------|--------------------------------------------------------------------------------------------------------------------------------------------------------------------------------------------------------------------------------------------------------------|-------------------------------------------------------------------------------|---------------------------------------------------------------------------------------------------------------------------------|
|                         |                              |                                                                                                                                                          |                                                                                                                                                                                                                                                              | According to this record 66.66% of deaths were males and 33.33% were females. | absence of national rabies surveillance system.                                                                                 |
| Olugasa 2010<br>Nigeria | Clinical trial               | Of these 70 healthy individuals, 29 (41.4%) consisting of 15 zoological garden workers (75.0%), 13 veterinarians (65.0%) and 1 veterinary student (3.3%) | A purified chicken-embryo cell rabies vaccine One dose (1 ml of $\geq 2.5$ IU/ml vaccine potency) was administered intramuscularly every two years immune to rabies virus (antibody titre $>0.5$ equivalent units per ml), while 41 (58.6%) were not immune. | Overall, antibody levels increased from 1-5 years to 10-30 years on the job.  | Almost all those who had spent at least 10 years on the job had higher levels of rabies vaccination compliance and were immune. |
| Mazigo 2010<br>Tanzania | A 5-year retrospective study | A total of 767 bite injuries inflicted by rabies-suspected animals were reported.                                                                        | Adherence to post-exposure prophylaxis (PEP) regimen                                                                                                                                                                                                         | mean annual incidence of ~58 cases per 100,000 (52.5% males, 47.5% females)   | Only 28% of the victims completed the vaccination regime.                                                                       |

|                                  |                                                          |                                                                                                                                                        |                                                                                                 |                                                                                                                                                                                                    |                                                                                                                                                        |
|----------------------------------|----------------------------------------------------------|--------------------------------------------------------------------------------------------------------------------------------------------------------|-------------------------------------------------------------------------------------------------|----------------------------------------------------------------------------------------------------------------------------------------------------------------------------------------------------|--------------------------------------------------------------------------------------------------------------------------------------------------------|
| <p>Jemberu 2013<br/>Ethiopia</p> | <p>Cross-sectional and year prospective cohort study</p> | <p>120 selected dog owners 5 traditional healers in North Gondar zone, Ethiopia.</p>                                                                   | <p>clinical observation<br/><br/>A questionnaire on rabies people's knowledge and practices</p> | <p>Annual estimated rabies incidence of 2.33 cases per 100,000 in humans.<br/><br/>During the follow up period, a total of 32 in humans were recorded from which 3 humans ended with fatality.</p> | <p>Vaccination of dogs, proper post exposure management, and increasing the awareness of the community are suggested to reduce the disease burden.</p> |
| <p>Edward 2014<br/>Ghana</p>     | <p>3-year retrospective study</p>                        | <p>546 dog-bite victims were reported; 295 (54%) were children &lt; 15 years, 169 (31%) were between 15-59 years and 82 (13%) were above 60 years.</p> | <p>Post-exposure prophylaxis</p>                                                                | <p>54 dog-bite victims bitten by rabies-positive dogs were reported.</p>                                                                                                                           | <p>24% of dog-bite victims did not complete the post exposure anti human rabies vaccine course and were not likely to be postexposure prophylaxis.</p> |
| <p>Ramos 2015<br/>Ethiopia</p>   | <p>A retrospective, registry-based study</p>             | <p>A total of 683 persons (51.1% females, 73% children) with animal-related bites.</p>                                                                 | <p>All the patients received an anti-rabies nervous-tissue vaccine.</p>                         | <p>No important complications were reported.</p>                                                                                                                                                   | <p>99% of whom completed the vaccination course.</p>                                                                                                   |

1  
2  
3  
4  
5  
6  
7  
8  
9  
10  
11  
12  
13  
14  
15  
16  
17  
18  
19  
20  
21  
22  
23  
24  
25  
26  
27  
28  
29  
30  
31  
32  
33  
34  
35  
36  
37  
38  
39  
40  
41  
42  
43  
44  
45  
46

|                                                                                              |                                  |                                                      |                                                                                                                                        |                                                                         |                                                                                                                        |                                                                                                                                                                                                              |
|----------------------------------------------------------------------------------------------|----------------------------------|------------------------------------------------------|----------------------------------------------------------------------------------------------------------------------------------------|-------------------------------------------------------------------------|------------------------------------------------------------------------------------------------------------------------|--------------------------------------------------------------------------------------------------------------------------------------------------------------------------------------------------------------|
| 1<br>2<br>3<br>4<br>5<br>6<br>7<br>8                                                         | Kardjadj<br>2019<br><br>Algeria  | A 13- year<br>retrospecti<br>ve study                | Annual average of PEP<br>cases: 96,203 people                                                                                          | post-exposure<br>prophylaxis and dog<br>vaccination                     | Annual average of<br>20.6 human rabies<br>deaths                                                                       | Overall dog rabies<br>vaccination coverage rate<br>of 68.78%.                                                                                                                                                |
| 9<br>10<br>11<br>12<br>13<br>14<br>15<br>16<br>17<br>18<br>19<br>20                          | Pfukenyi<br>2009<br><br>Zimbabwe | A<br>retrospecti<br>ve study                         | A total of 57 rabies-<br>suspect human samples<br>were examined and the<br>15–19-year age group<br>had the highest number<br>of cases. | Dog vaccination<br>coverage                                             | Among rabies-<br>suspect, 42<br>(73.7%) were<br>positive.                                                              | During the study period,<br>there was an inverse<br>relationship between dog<br>vaccination coverage and<br>dog rabies cases. Dog<br>vaccination coverage<br>decreased across the study<br>from 100% to 50%. |
| 21<br>22<br>23<br>24<br>25<br>26<br>27<br>28<br>29<br>30                                     | Punguyire<br>2017<br><br>Ghana   | 6-year<br>retrospecti<br>ve<br><br>records<br>review | 680 dog victims, the<br>median age of rabies<br>victims was 30 (range 3-<br>80 years).                                                 | Post-exposure<br>prophylaxis of rabies<br><br>Dog rabies<br>vaccination | 13 cases of human<br>rabies were<br>recorded.                                                                          | Less than 35% of the<br>suspected rabies dogs that<br>bit people over the period<br>were vaccinated. About<br>20% of the offending dogs<br>had unknown vaccination<br>status.                                |
| 31<br>32<br>33<br>34<br>35<br>36<br>37<br>38<br>39<br>40<br>41<br>42<br>43<br>44<br>45<br>46 | Teklu 2017<br><br>Ethiopia       | Four-year<br>Retrospect<br>ive Study                 | In total, 2180 human<br>rabies exposure cases<br>were registered and<br>followed for their PEP.<br>the greatest exposed age            | Prior to PEP<br>administration for<br>humans.<br><br>Dog vaccination    | The incidence of<br>human rabies<br>exposure cases<br>calculated per<br>100,000<br>populations was<br>35.8, 63.0, 89.8 | The total annually allocated<br>PEP to the region, nearly<br>60% was utilized.                                                                                                                               |

|                           |                                            |                                                                                                                                     |                                                  |                                                                                                    |                                                                                                                                                                                                                                                                                                                                                                                                               |
|---------------------------|--------------------------------------------|-------------------------------------------------------------------------------------------------------------------------------------|--------------------------------------------------|----------------------------------------------------------------------------------------------------|---------------------------------------------------------------------------------------------------------------------------------------------------------------------------------------------------------------------------------------------------------------------------------------------------------------------------------------------------------------------------------------------------------------|
|                           |                                            | group was $\geq 15$ years in all the study years                                                                                    |                                                  | and 73.1 in 2012, 2013, 2014 and 2015, respectively.                                               | Data on the coverage of preventive dog vaccination and demography were not evident in the study area.                                                                                                                                                                                                                                                                                                         |
| De Nardo 2018<br>Tanzania | 6-year retrospective study                 | 14,624 patients attended the clinics because of animal's bites. Eighty-three per cent (12,098) individuals came from Dodoma Region. | The adherence to post-exposure prophylaxis (PEP) | Mean incidence of 74 bites considered at risk of rabies transmission per 100,000 persons per year. | Overall, 46.0% of the total number of individuals exposed to potentially rabid animals completed the PEP course, while 6.5% (698) did not receive any dose.<br><br>Living in rural area was statistically associated with loss to follow up after the first dose<br><br>( $p < 0.001$ ) or after the second dose ( $p < 0.001$ )<br>Females were more likely to be lost after the first dose ( $p = 0.006$ ). |
| Yizengaw 2018<br>Ethiopia | 2-year retrospective cross-sectional study | A total of 924 human rabies exposure cases received the anti-rabies post-exposure prophylaxis. Of these, males accounted 55.2%      | Anti-rabies post exposure prophylaxis            | High incidence rate of rabies exposure was reported during spring (339%) and                       | There was significant difference between rural and urban exposure cases ( $p = 0.001$ ) in respect to the time of arrival to the hospital. There was high                                                                                                                                                                                                                                                     |

|                         |                              |                                                                             |                                                                                                                         |                                                                                                                 |                                                                                                                                                                                                                                                          |
|-------------------------|------------------------------|-----------------------------------------------------------------------------|-------------------------------------------------------------------------------------------------------------------------|-----------------------------------------------------------------------------------------------------------------|----------------------------------------------------------------------------------------------------------------------------------------------------------------------------------------------------------------------------------------------------------|
|                         |                              | and the median age was 18 years (ranges: 1–80 years).                       | A structured data collection questionnaire                                                                              | summer (26.4%) seasons.                                                                                         | human rabies exposure rate in children and in the rural community.<br><br>The health status of most dogs (67.3%) involved in biting was unknown (they were stray dogs) and 28.8% were sick: develop the signs of rabid animal within ten days follow up. |
| Gebbru 2019<br>Ethiopia | One-year retrospective study | 368 human rabies exposure cases. Age group of 5 to 14 years old.            | Recommendation to start PEP immediately after exposure, depending on the type of exposure.<br><br>Dog vaccination 14.1% | Incidence of human rabies exposure was 40 per 100,000 populations.                                              | A higher proportion of human rabies exposures was caused by unprovoked dogs (96.5%; 95% CI, 94.0–98.0), and of these, the majority were unvaccinated (85.9%; 95% CI, 81.9–89.1).                                                                         |
| Zimmer 2019<br>Malawi   | 6-year Retrospective study   | Children victims of dog bite. The average age was seven years (range 3–11). | Pre and post a comprehensive canine vaccine campaign                                                                    | 14 paediatric rabies cases were found during the study period. More males than females were affected (males: 10 | The study shows the importance of eliminating human rabies through canine rabies vaccination.                                                                                                                                                            |



|                      |                       |                                                                                                                    |                                                                                                                                                          |                                                                                                                                                                                                                                                                                                                                                                  |                                                                                                                                                                                                                                                                                                                                                                                            |
|----------------------|-----------------------|--------------------------------------------------------------------------------------------------------------------|----------------------------------------------------------------------------------------------------------------------------------------------------------|------------------------------------------------------------------------------------------------------------------------------------------------------------------------------------------------------------------------------------------------------------------------------------------------------------------------------------------------------------------|--------------------------------------------------------------------------------------------------------------------------------------------------------------------------------------------------------------------------------------------------------------------------------------------------------------------------------------------------------------------------------------------|
|                      |                       |                                                                                                                    |                                                                                                                                                          | (71%); females: 4 (29%).                                                                                                                                                                                                                                                                                                                                         |                                                                                                                                                                                                                                                                                                                                                                                            |
| Rabies surveillance  |                       |                                                                                                                    |                                                                                                                                                          |                                                                                                                                                                                                                                                                                                                                                                  |                                                                                                                                                                                                                                                                                                                                                                                            |
| Fevre 2005<br>Uganda | Cross-sectional study | A total of 517 patients were interviewed in 10 randomly selected districts in Uganda in the 3 months of the study. | Passive surveillance<br><br>Survey of dog bite injuries and rabies post-exposure treatment activities in treatment centres supplied with rabies vaccine. | Death in absence of post-exposure prophylaxis (PET), 592 (95% CI 345–920) deaths<br><br>One dose of PET is sufficient for protection following a rabid animal bite, 20 (95% CI 5–50) deaths annually. Complete course of PET is required for protection following a rabid animal bite, up to 210 (95% CI 115–359) deaths would occur, as 41% of patients did not | Most patients are bitten by dogs, and that a considerable proportion of these are young children, who are at greater risk of developing rabies in the absence of treatment due to the location of the bites they receive.<br><br>Active animal bite surveillance studies are required to improve our mortality estimates and determine the true burden of rabies in the Ugandan population |

1  
2  
3  
4  
5  
6  
7  
8  
9  
10  
11  
12  
13  
14  
15  
16  
17  
18  
19  
20  
21  
22  
23  
24  
25  
26  
27  
28  
29  
30  
31  
32  
33  
34  
35  
36  
37  
38  
39  
40  
41  
42  
43  
44  
45  
46

|                            |                            |                                                                                                                                                              |                                                                                                            |                                                                                                                                    |                                                                                                                                                         |
|----------------------------|----------------------------|--------------------------------------------------------------------------------------------------------------------------------------------------------------|------------------------------------------------------------------------------------------------------------|------------------------------------------------------------------------------------------------------------------------------------|---------------------------------------------------------------------------------------------------------------------------------------------------------|
|                            |                            |                                                                                                                                                              |                                                                                                            | complete their course of PET.                                                                                                      |                                                                                                                                                         |
| Reynes 2011<br>Madagascar  | 6-year retrospective study | 11 human samples were tested for rabies.                                                                                                                     | Laboratory Surveillance of domestic or tame wild terrestrial mammal and dog brains tested.                 | Nine of the 11 suspected human cases tested were laboratory confirmed for rabies.                                                  | Rabies remains endemic in Madagascar. this study has found the lack of epidemiological data in Madagascar                                               |
| Nyakarahuka 2012<br>Uganda | 9-year retrospective study | Cumulative total of 117,085 rabies cases were reported in 9 years.                                                                                           | Surveillance reports from all the districts.                                                               | A total of 371 deaths of rabies were recorded.                                                                                     | Findings emphasize the need for active surveillance; follow up of people bitten by animals and mass dog vaccinations to alleviate this zoonotic threat. |
| Sambo 2013<br>Tanzania     | Cross-sectional study      | Human population (district)<br><br>Ulanga: 193280<br><br>Kilombero: 321611<br><br>Serengeti: 176057<br><br>The ages of suspect bite victims ranged from 1 to | Extensive investigative interviews were used to estimate the incidence of human deaths and bite exposures. | Average annual incidence/<br><br>100,000<br><br>Bites: 37.1;11.3 and 33.5 respectively<br><br>Death: 2.4; 0.8 and 1.4 respectively | Ninety-four percent (391/415) of these suspects bite victims reported to health facilities for PEP.                                                     |

|                        |                                |                                                                                                                                                                                                            |                                                                                        |                                                                      |                                                                                                                                                                                                                                                   |
|------------------------|--------------------------------|------------------------------------------------------------------------------------------------------------------------------------------------------------------------------------------------------------|----------------------------------------------------------------------------------------|----------------------------------------------------------------------|---------------------------------------------------------------------------------------------------------------------------------------------------------------------------------------------------------------------------------------------------|
|                        |                                | 90 years. The majority of suspect bite victims (51%) were children less than 15 years of age.                                                                                                              |                                                                                        |                                                                      |                                                                                                                                                                                                                                                   |
| Adomako 2018<br>Ghana  | 3-year retrospective study     | Overall, 4821 dog victims' bites. Most of the cases were in children aged below 10 years.                                                                                                                  | The health and veterinary services on issues related to surveillance and data quality. | Annual incidence of rabies cases of 172 per a population of 100,000. | In the 82% of cases where data was available, no postexposure prophylaxis (PEP) was administered. The fatality rate was 100%.<br><br>The study found gross disparities in the number of reported events and overall impression of underreporting. |
| Masiira 2018<br>Uganda | A 14-year retrospective review | A total of 208,720 patients with animal bite injuries were treated at health facilities across the country.<br><br>Up to 81% were patients >=5 years of age and 19% (n = 9,102) were below 5 years of age. | Epidemiological surveillance data                                                      | A total of 486 suspected human rabies deaths were reported.          | Strengthening rabies surveillance, controlling rabies in dogs and ensuring availability of post exposure prophylaxis at lower health facilities are the best approach of eliminating rabies.                                                      |

1  
2  
3  
4  
5  
6  
7  
8  
9  
10  
11  
12  
13  
14  
15  
16  
17  
18  
19  
20  
21  
22  
23  
24  
25  
26  
27  
28  
29  
30  
31  
32  
33  
34  
35  
36  
37  
38  
39  
40  
41  
42  
43  
44  
45  
46

|                             |                                                      |                                                                                                                                                        |                                                                                                                                                                          |                                                                                                                                                                                    |                                                                                                                                                                                                                                                                                                                                               |
|-----------------------------|------------------------------------------------------|--------------------------------------------------------------------------------------------------------------------------------------------------------|--------------------------------------------------------------------------------------------------------------------------------------------------------------------------|------------------------------------------------------------------------------------------------------------------------------------------------------------------------------------|-----------------------------------------------------------------------------------------------------------------------------------------------------------------------------------------------------------------------------------------------------------------------------------------------------------------------------------------------|
| Tiembre 2018<br>Ivory Coast | A 2-year descriptive prospective observational study | 2968 weekly reports, all were received by the NIPH Anti-rabies Center. Almost one-half of the human rabies cases were in children $\leq 15$ years old. | Human rabies surveillance system in those 28 NIPH local units, with specific goals of improving the infrastructure, training, communication, and government involvement. | 50 cases of human rabies ( $15 \pm 18$ cases/year; annual incidence = $0.06-0.08$ per 100,000) and more than 30,000 animal exposures (annual incidence = $41.8-48.0$ per 100,000). | The study is the result of enhancing human rabies surveillance in Ivory Coast<br><br>None of cases had received PEP. Post-exposure prophylaxis with rabies vaccine was administered to all animal exposure victims presenting at the NIPH local units; only about 57% completed the full immunization schedule.                               |
| Ngugi 2018<br>Kenya         | 5-year retrospective study                           | Among 7307 records analyzed, 7201 (98.6%) had age recorded.<br><br>The median age was 22 years                                                         | Surveillance of PEP was given, and number of PEP doses administered.                                                                                                     | Human animal-bite injuries incidence was 289 per 100,000 persons with the highest incidence reported at 302 per 100,000 and lowest at 121 per 100,000 persons.                     | The study concluded preventing dog bites would most effectively reduce bite injuries by improving public health education among children below 15 years, encouraging early PEP initiation and completion, development and implementation of responsible dog ownership and animal behaviour, educational programmes as well as improving human |

|                                                                  |                            |                                                                                                                                                                                         |                                                                                                                                                                                             |                                                                                                                                                                                                 |                                                                                                                                       |
|------------------------------------------------------------------|----------------------------|-----------------------------------------------------------------------------------------------------------------------------------------------------------------------------------------|---------------------------------------------------------------------------------------------------------------------------------------------------------------------------------------------|-------------------------------------------------------------------------------------------------------------------------------------------------------------------------------------------------|---------------------------------------------------------------------------------------------------------------------------------------|
|                                                                  |                            |                                                                                                                                                                                         |                                                                                                                                                                                             |                                                                                                                                                                                                 | and veterinary health linkages.                                                                                                       |
| Hikufe 2019<br>Namibia                                           | 6-year retrospective study | Of the total number of 113 cases, the majority (67%) were children and teenagers below 16 years of age, peaking at 5–9 years.                                                           | Human rabies surveillance data were retrieved from the epidemiological database of the Ministry of Health.<br><br>Surveillance in animals is based on the reporting of all suspected cases. | Rabies cases have been above 16 cases per year from 2011 until 2015 with a maximum of 23 cases observed in 2015.<br><br>Incidence: 1.0 and 2.4 per 100,000 inhabitants and per year on average. | Kavango, the region with the highest human rabies incidence was also the region with the lowest animal rabies surveillance intensity. |
| Rabies surveillance and prevention                               |                            |                                                                                                                                                                                         |                                                                                                                                                                                             |                                                                                                                                                                                                 |                                                                                                                                       |
| Andriamandimby 2013<br>La Reunion,<br>Mayotte, and<br>Madagascar | 6-year Retrospective study | 24 946 patients visited the ARMC at the IPM, of which 97.2% (n = 24 299) received PEP. Males represented 54.3% (n = 13 556) of the cases and ranged in age from one to 97 years (median | Laboratory surveillance of rabies<br><br>Post-exposure prophylaxis of rabies                                                                                                                | 31 positive cases of human rabies                                                                                                                                                               | None of these patients received PEP except for one who started PEP late, 10 days after the suspected bite.                            |

1  
2  
3  
4  
5  
6  
7  
8  
9  
10  
11  
12  
13  
14  
15  
16  
17  
18  
19  
20  
21  
22  
23  
24  
25  
26  
27  
28  
29  
30  
31  
32  
33  
34  
35  
36  
37  
38  
39  
40  
41  
42  
43  
44  
45  
46

|                              |                                |                                                                                                                                                                                                           |                                                                                                                                                                                                                    |                                                                                                                       |                                                                                                                                                                                                                                                                                           |
|------------------------------|--------------------------------|-----------------------------------------------------------------------------------------------------------------------------------------------------------------------------------------------------------|--------------------------------------------------------------------------------------------------------------------------------------------------------------------------------------------------------------------|-----------------------------------------------------------------------------------------------------------------------|-------------------------------------------------------------------------------------------------------------------------------------------------------------------------------------------------------------------------------------------------------------------------------------------|
|                              |                                | = 18 years). Children under 15 years old represented 40.5% (n = 10 107) of the consultants.                                                                                                               |                                                                                                                                                                                                                    |                                                                                                                       | Dog vaccination coverage in Madagascar was 10%                                                                                                                                                                                                                                            |
| Kubheka 2013<br>South Africa | 3-year retrospective study     | 2 601 patients who were offered rabies PEP. The median age of the people bitten by dogs during the two years was 20 years (with a range from 1- 92 years). The majority (61.3%) were aged 5-29 years old. | human rabies surveillance database the uptake of the rabies PEP and patients telephone contact.                                                                                                                    | An average annualized rabies attack rate of 136 rabies cases per 100 000 dog-bite injuries (7/5 139).<br><br>6/7 died | 83.7% [95% confidence interval (CI): 82.4-85.2] completed the PEP treatment.                                                                                                                                                                                                              |
| Sofeu 2018<br>Cameroon       | A one year retrospective study | A total of 1,402 animal exposures were reported in the West region of Cameroon.                                                                                                                           | The surveillance network consisted of local, regional, and national health and veterinary authorities.<br><br>PEP and immunizations received prior to the current exposure; and the wound treatment were recorded. | Overall incidence rate of 6.1 exposures per 100,000 people.<br><br>One was confirmed positive for rabies              | Overall, at least 421 (60%) of the exposure victims considered to be at risk of rabies either did not receive any PEP or did not receive all PEP vaccinations.<br><br>Only 12.6% (117/925) of dogs were reported to have been vaccinated and only 14.4% of the animal exposure cases were |

1  
2  
3  
4  
5  
6  
7  
8  
9  
10  
11  
12  
13  
14  
15  
16  
17  
18  
19  
20  
21  
22  
23  
24  
25  
26  
27  
28  
29  
30  
31  
32  
33  
34  
35  
36  
37  
38  
39  
40  
41  
42  
43  
44  
45  
46

|                                |                                     |                                                                                                                            |                                                                                                                                                                                                           |                                                                                                                                                          |                                                                                                                                                                                                                              |
|--------------------------------|-------------------------------------|----------------------------------------------------------------------------------------------------------------------------|-----------------------------------------------------------------------------------------------------------------------------------------------------------------------------------------------------------|----------------------------------------------------------------------------------------------------------------------------------------------------------|------------------------------------------------------------------------------------------------------------------------------------------------------------------------------------------------------------------------------|
|                                |                                     |                                                                                                                            |                                                                                                                                                                                                           |                                                                                                                                                          | <p>followed-up with a visit by a veterinarian</p> <p>No adverse events to PEP were reported.</p>                                                                                                                             |
| <p>Mtema 2016<br/>Tanzania</p> | <p>A 5-year retrospective study</p> | <p>Reports recorded bite patients seeking PEP (14,565 records, 49%), detailing visits of approximately 5,800 patients.</p> | <p>Automated SMS (short message service, commonly known as a “text” message) reminders to patients due for further PEP doses.</p> <p>Mass dog vaccinations</p> <p>Mobile Phones as Surveillance Tools</p> | <p>Human rabies cases (42 reported) reflected issues with PEP supply.</p> <p>Incidence of bite patients seeking PEP declined substantially (&gt;50%)</p> | <p>Compliance with PEP regimens was significantly higher for patients following the implementation of automated reminders in comparison to patients attending clinics prior 7% of patients failed to obtain PEP.</p>         |
| <p>Twabela 2016<br/>DRC</p>    | <p>A 5-year retrospective study</p> | <p>A total of 5,053 attacks were recorded in the veterinary clinics.</p>                                                   | <p>Laboratory surveillance</p> <p>PEP and immunizations</p>                                                                                                                                               | <p>29 were found positive to rabies.</p>                                                                                                                 | <p>Rabies cases were three times higher in peri-urban zone than in urban zone.</p> <p>It was observed that among the 5,053 attacks registered, 83 (1.6%) animals were killed and 15 (0.3%) disappeared just after attack</p> |

|                          |                                                      |                                                                                                                                                                         |                                                                                                                                                                 |                                                                                                                       |                                                                                                |
|--------------------------|------------------------------------------------------|-------------------------------------------------------------------------------------------------------------------------------------------------------------------------|-----------------------------------------------------------------------------------------------------------------------------------------------------------------|-----------------------------------------------------------------------------------------------------------------------|------------------------------------------------------------------------------------------------|
|                          |                                                      |                                                                                                                                                                         |                                                                                                                                                                 |                                                                                                                       | without a follow-up or a veterinary observation.                                               |
| Post exposure management |                                                      |                                                                                                                                                                         |                                                                                                                                                                 |                                                                                                                       |                                                                                                |
| Osaghae 2011<br>Nigeria  | A twelve-year retrospective study                    | 105 episodes of human and animal bites Recorded.<br><br>Comparators: N/A                                                                                                | Wound Management<br><br>Twenty (%) domestic dogs were vaccinated while 11(%) and six (%) were not vaccinated and without known vaccination status respectively. | A 10-year-old girl had rabies and died on the second day of admission.                                                | The anti-rabies vaccine was not administered to the children bitten by the vaccinated animals. |
| Alabi 2014<br>Nigeria    | 3-year retrospective study and cross-sectional study | Only 195 (50.9%) of the 383 bite victims linked to a positive dog specimen could be traced.<br><br>About three quarters (141 (73%)) of the victims were aged <16 years. | A review of detailed profiles of dog bite victims managed in the clinics.                                                                                       | 54% of the victims took complete PEP. For those who did not complete PEP, 93% of the biting dogs were not vaccinated. | It has shown lack of enforcement of regulations for licensing of dogs and rabies vaccination.  |



|                                  |                                      |                                                                                                                                                                     |                                                                                                                                                                     |                                                                                                                                                                                                                               |                                                                                                                                       |
|----------------------------------|--------------------------------------|---------------------------------------------------------------------------------------------------------------------------------------------------------------------|---------------------------------------------------------------------------------------------------------------------------------------------------------------------|-------------------------------------------------------------------------------------------------------------------------------------------------------------------------------------------------------------------------------|---------------------------------------------------------------------------------------------------------------------------------------|
| <p>Muyila 2014<br/>DRC</p>       | <p>A 8-month retrospective study</p> | <p>21 cases were observed, rather three cases per month. There were 12 boys (57.1%) and 9 girls (42.9%). Biting animal was found to be dog in all cases (100%).</p> | <p>(9.5%) had their wounds treated and received an anti-rabies vaccine (ARV) after the bite incident. Two (9.5%) patients received rabies immunoglobulin (RIG).</p> | <p>100% of patients showed furious rabies manifestations<br/><br/>The case-fatality rate was 100%.</p>                                                                                                                        | <p>The study revealed the dogs were not immunized for rabies.</p>                                                                     |
| <p>Frey 2013<br/>Chad</p>        | <p>Cross-sectional study</p>         | <p>Of 86 people exposed to a suspected rabid animal. The median age was 18 years, with a range between 2 months and 79 years.</p>                                   | <p>Post-exposure vaccination and wound cleaned.</p>                                                                                                                 | <p>Estimated annual incidence of bites from suspected rabid animals of 12.9/100 000 and an incidence of 0.7 human rabies deaths/ 100 000, resulting in 7 estimated deaths (95% confidence interval 4–10 deaths) per year.</p> | <p>50% received post-exposure vaccination and a further 8% had their wound cleaned.</p>                                               |
| <p>Ogundare 2017<br/>Nigeria</p> | <p>A retrospective study</p>         | <p>In all, 84 cases of dog bite injuries were managed constituting 0.89% of the total consultations. Most of</p>                                                    | <p>Treatments received in the hospital ranged from washing the bite site with soap and water, to suturing of</p>                                                    | <p>Six (7.1%) of cases had rabies and died.</p>                                                                                                                                                                               | <p>Although seventy-eight (92.9%) of the victims had post-exposure prophylaxis (PEP) with anti-rabies vaccine, only 45 (53.6%) of</p> |

1  
2  
3  
4  
5  
6  
7  
8  
9  
10  
11  
12  
13  
14  
15  
16  
17  
18  
19  
20  
21  
22  
23  
24  
25  
26  
27  
28  
29  
30  
31  
32  
33  
34  
35  
36  
37  
38  
39  
40  
41  
42  
43  
44  
45  
46

|                           |                               |                                                                                                                             |                                                                                                                                                                                       |                                                                                                                                                             |                                                                                                                                                                                                                                  |
|---------------------------|-------------------------------|-----------------------------------------------------------------------------------------------------------------------------|---------------------------------------------------------------------------------------------------------------------------------------------------------------------------------------|-------------------------------------------------------------------------------------------------------------------------------------------------------------|----------------------------------------------------------------------------------------------------------------------------------------------------------------------------------------------------------------------------------|
|                           |                               | the victims were aged 6-12 years (60.7%) and majority (71.4%) was boys.                                                     | lacerations and wound dressing, analgesics, tetanus prophylaxis, anti-rabies vaccination (ARV), intravenous fluids and diazepam administration as well as antibiotics administration. |                                                                                                                                                             | them were managed successfully and subsequently discharged after ensuring adequate wound healing and completion of the vaccination regimen. Thirty-three (39.3%) were lost to follow up.                                         |
| Abubakar 2012<br>Nigeria  | A 10-year retrospective study | 81 victims of dog bite injuries. The majority, 45 (55.6%), were children less than 18 years while 36 (44.4%) were adults.   | Wound care<br>PEP and the Immunization schedule                                                                                                                                       | Two cases of clinical rabies were seen during the study period.                                                                                             | Prevalence of dog bite was highest, 41 (50.6%), during the hot season (April–June) and low, 14 (17.3%), during the wet season (July–October). None of the victims was previously immunized against rabies.                       |
| Kent 2012<br>South Africa | A 4-year retrospective study  | A total of 821 patients complaining of dog bite. Male children aged 6 - 10 years are most likely to present with dog bites. | Advice only<br>Wound management<br>Give vaccine<br>Give anti-rabies immunoglobulin                                                                                                    | Of the 821 bites, 642 (78%) were grade 3; 84 (10%) were grade 2; and 43 (5%) were grade 1. In 52 cases (7%), grade of bite was not recorded. Treatment with | Males present more frequently than females, and young males (ages 6 - 10) are most likely to present. This trend reverses after the age of 40 years, when females are more likely to present than males. We also showed that 99% |

|                                                      |                                  |                                                                                                                             |                                                                                                                                                             |                                                                                                                                                                                                                                    |                                                                                                                                                                        |
|------------------------------------------------------|----------------------------------|-----------------------------------------------------------------------------------------------------------------------------|-------------------------------------------------------------------------------------------------------------------------------------------------------------|------------------------------------------------------------------------------------------------------------------------------------------------------------------------------------------------------------------------------------|------------------------------------------------------------------------------------------------------------------------------------------------------------------------|
|                                                      |                                  |                                                                                                                             |                                                                                                                                                             | <p>rabies vaccine was started in 90% of cases of grade 1 bites, 97% of grade 2 bites and 99% of grade 3 bites.</p> <p>Immunoglobulin was administered for 53% of grade 1 bites, 84% of grade 2 bites and 82% of grade 3 bites.</p> | <p>of grade 3 bite patients are treated with rabies vaccine, but the rate of treatment with immunoglobulin is lower (82%).</p>                                         |
| Rabies Diseases Surveillance, Prevention and Control |                                  |                                                                                                                             |                                                                                                                                                             |                                                                                                                                                                                                                                    |                                                                                                                                                                        |
| Lushasi 2020 Tanzania                                | Multi-center retrospective study | 1,291 victims' bite. The study was undertaken across 20 districts in 4 regions in Southern, Central, and Northern Tanzania. | <p>Integrated Bite Case Management (IBCM). We trained government staff to implement</p> <p>IBCM, comprising risk assessments of bite patients by health</p> | <p>Only 63 of these bite patients were referred to other facilities for PEP with 43 assessed as being suspect rabies exposures. Sixteen human deaths due to</p>                                                                    | <p>Throughout the study regions, PEP was unavailable for 74 bite patients (5.7%) upon presentation to a health facility, during the period of IBCM implementation.</p> |

1  
2  
3  
4  
5  
6  
7  
8  
9  
10  
11  
12  
13  
14  
15  
16  
17  
18  
19  
20  
21  
22  
23  
24  
25  
26  
27  
28  
29  
30  
31  
32  
33  
34  
35  
36  
37  
38  
39  
40  
41  
42  
43  
44  
45  
46

|                                  |                                                |                                                                                                                                                                                                                                                         |                                                                                                                                                                                                                                          |                                                                                                                                                                                                                                            |                                                                                                                                                                                                                                                                                                                                  |
|----------------------------------|------------------------------------------------|---------------------------------------------------------------------------------------------------------------------------------------------------------------------------------------------------------------------------------------------------------|------------------------------------------------------------------------------------------------------------------------------------------------------------------------------------------------------------------------------------------|--------------------------------------------------------------------------------------------------------------------------------------------------------------------------------------------------------------------------------------------|----------------------------------------------------------------------------------------------------------------------------------------------------------------------------------------------------------------------------------------------------------------------------------------------------------------------------------|
|                                  |                                                |                                                                                                                                                                                                                                                         | workers, investigations by livestock field officers to diagnose rabid animals, and use of a mobile phone application to support integration.                                                                                             | rabies were reported within the IBCM study districts.<br><br>Overall bite patient presentations corresponded to an incidence of 17.4 bites per 100,000 persons per annum.                                                                  |                                                                                                                                                                                                                                                                                                                                  |
| Changalucha 2019<br><br>Tanzania | 5-year retrospective and cross-sectional study | About 36% of patient presentations at health facilities were due to bites from probable rabid dogs (1,878/5,162 patients that sought care) as assessed through contact tracing, with the remainder from healthy animals or animals with unknown status. | Mobile phone-based surveillance records<br><br>PEP was supplied free-of-charge to hospitals<br><br>and selected outlying facilities in each district and training was provided to over 300 health workers in use of the updated Thai Red | We detected an average of 75.6 and 19.3 probable rabies exposures per 100,000 persons per year.<br><br>Of 1005 individuals identified during contact tracing who received late and/or incomplete postexposure vaccination, 14 died showing | Upon seeking care, a further 15% of probable rabies exposed persons did not obtain PEP due to shortages, cost barriers or mis advice.<br><br>Of those that initiated PEP, 46% did not complete the course. Decentralized and free PEP increased the probability that patients received PEP and reduced delays in initiating PEP. |

1  
2  
3  
4  
5  
6  
7  
8  
9  
10  
11  
12  
13  
14  
15  
16  
17  
18  
19  
20  
21  
22  
23  
24  
25  
26  
27  
28  
29  
30  
31  
32  
33  
34  
35  
36  
37  
38  
39  
40  
41  
42  
43  
44  
45  
46

|                           |                              |                                                                   |                                                                                                                                                                                                              |                                                                                                                                                                                                                           |                                                                                                                              |
|---------------------------|------------------------------|-------------------------------------------------------------------|--------------------------------------------------------------------------------------------------------------------------------------------------------------------------------------------------------------|---------------------------------------------------------------------------------------------------------------------------------------------------------------------------------------------------------------------------|------------------------------------------------------------------------------------------------------------------------------|
|                           |                              |                                                                   | <p>Cross ID regimen (5-dose Essen IM regimen).</p> <p>Qualitative interviews with stakeholders at different levels within the health system to characterize the logistics associated with PEP provision.</p> | clinical signs of rabies.                                                                                                                                                                                                 |                                                                                                                              |
| Rajeev 2019<br>Madagascar | One-year retrospective study | 1019 patients reported to the anti-rabies medical centers (ARMC). | A combined strategy of mass dog vaccination, enhanced surveillance, and expanded access to PEP.                                                                                                              | Annual incidence of 42–110 rabies exposures and 1–3 deaths per 100,000 persons annually. Extrapolating an annual burden of 282–745 human rabies deaths with current PEP provisioning averting 1499–3958 deaths each year. | A high proportion of rabies-exposed persons from Moramanga sought (84%) and completed PEP (90% of those that initiated PEP). |

|                        |                                                                                  |                                                                                                         |                                                                                                                                                                                                                                                                                                                                              |                                                                                                                                                                                                                                                                                                                                                                                                                                         |                                                                                                                                                                               |
|------------------------|----------------------------------------------------------------------------------|---------------------------------------------------------------------------------------------------------|----------------------------------------------------------------------------------------------------------------------------------------------------------------------------------------------------------------------------------------------------------------------------------------------------------------------------------------------|-----------------------------------------------------------------------------------------------------------------------------------------------------------------------------------------------------------------------------------------------------------------------------------------------------------------------------------------------------------------------------------------------------------------------------------------|-------------------------------------------------------------------------------------------------------------------------------------------------------------------------------|
| Diallo 2019<br>Senegal | A prospective cohort study was carried out from April 1, 2013 to March 31, 2014, | 1036 patients sought a consultation at the Pasteur Institute of Dakar for suspicion of rabies exposure. | <p>Post-exposure prophylaxis implementation (consists of injection of four intramuscular doses of a purified vero cell rabies vaccine).</p> <p>Dog rabies vaccination treatment (local treatment of injuries, antibiotics administration, and previous rabies vaccination), knowledge of rabies and attitudes in respect to animal bite.</p> | <p>No death was reported during the study period.</p> <p>Adverse events were reported after the first two doses by 6% of the patients (42/678) (including 5 patients who also received equine RIG at D0), and after the third dose, by 3% (16/493). Most of them were minor: headache (46.5%), fever (31%) and pain at the injection site (22%), and mostly (74%) occurred on the same day of the vaccine injection (up to 7 days).</p> | Out of the patients receiving PEP, 162 (18%) patients received two doses only at D0, 185 (20.5%) three doses at D0 and D7 and 493 (54.5%) completed the full 4-dose schedule. |
|------------------------|----------------------------------------------------------------------------------|---------------------------------------------------------------------------------------------------------|----------------------------------------------------------------------------------------------------------------------------------------------------------------------------------------------------------------------------------------------------------------------------------------------------------------------------------------------|-----------------------------------------------------------------------------------------------------------------------------------------------------------------------------------------------------------------------------------------------------------------------------------------------------------------------------------------------------------------------------------------------------------------------------------------|-------------------------------------------------------------------------------------------------------------------------------------------------------------------------------|

|                                             |                                            |                                                                                                                                                                                                                                                     |                                                                                                                                                                                                                                               |                                                                                                                                                                                                                                     |                                                                                                                                                                                                                                                                                                                                                                     |
|---------------------------------------------|--------------------------------------------|-----------------------------------------------------------------------------------------------------------------------------------------------------------------------------------------------------------------------------------------------------|-----------------------------------------------------------------------------------------------------------------------------------------------------------------------------------------------------------------------------------------------|-------------------------------------------------------------------------------------------------------------------------------------------------------------------------------------------------------------------------------------|---------------------------------------------------------------------------------------------------------------------------------------------------------------------------------------------------------------------------------------------------------------------------------------------------------------------------------------------------------------------|
| <p>Hampson<br/>2008<br/><br/>Tanzania</p>   | <p>5-year<br/>retrospecti<br/>ve study</p> | <p>1080 people were traced<br/>and interviewed who had<br/>been bitten by animals.</p>                                                                                                                                                              | <p>Contact tracing was<br/>used to gather data on<br/>rabies exposures,<br/>post-exposure<br/>prophylaxis (PEP)<br/>delivered and deaths<br/>case reports from<br/>livestock offices and<br/>community-based<br/>surveillance activities.</p> | <p>Twenty-eight<br/>deaths from<br/>suspected rabies<br/>were recorded<br/>during the five-<br/>year period in the<br/>two districts, an<br/>average of<br/>1.5/100,000 per<br/>year in Serengeti<br/>and 2.3 in<br/>Ngorongoro</p> | <p>Insufficient knowledge<br/>about rabies dangers and<br/>prevention, particularly<br/>prompt PEP, but also<br/>wound management, was<br/>the main cause of rabies<br/>deaths.</p> <p>Received PEP: 685 (71%)</p> <p>Attended hospital: 971<br/>(85%)</p> <p>PEP dramatically reduced<br/>the risk of developing<br/>rabies (OR 17.33, 95% CI<br/>6.39–60.83).</p> |
| <p>Salomão<br/>2017<br/><br/>Mozambique</p> | <p>A case<br/>control<br/>study</p>        | <p>819 cases of animal bites<br/>were registered, of which<br/>64.6% (529/819) were<br/>from Maputo City.</p> <p>Same neighborhood<br/>close to the human rabies<br/>victim's house were used<br/>as controls (case: control<br/>ratio of 1:4).</p> | <p>Affixing posters in<br/>health units regarding<br/>treatment of animal<br/>bites and post-<br/>exposure prophylaxis.</p> <p>Delivery of additional<br/>quantities of anti-<br/>rabies vaccine to the<br/>Prophylaxis.</p>                  | <p>A total of 14 cases<br/>of fatal rabies,<br/>among them 12<br/>died.</p>                                                                                                                                                         | <p>No rabies victim received<br/>full post-exposure<br/>vaccination</p> <p>Factors significantly<br/>associated with human<br/>rabies were age &lt;15 years<br/>(p = 0.05), bite by stray dog<br/>(p = 0.002), deep wound (p<br/>= 0.02), bite in the head (p<br/>= 0.001), bite by</p>                                                                             |

|  |  |  |                                                                                                                                                                                                                                                                                                                                                                                                   |  |                                                                                                                                                              |
|--|--|--|---------------------------------------------------------------------------------------------------------------------------------------------------------------------------------------------------------------------------------------------------------------------------------------------------------------------------------------------------------------------------------------------------|--|--------------------------------------------------------------------------------------------------------------------------------------------------------------|
|  |  |  | <p>Decentralization of post-exposure prophylaxis.</p> <p>Vaccination of dogs in the neighborhoods where human rabies cases had occurred.</p> <p>Mass vaccination campaign of dogs.</p> <p>Participation of private veterinary clinics in animal vaccination.</p> <p>Collection of stray dogs in selected neighborhoods.</p> <p>Community education regarding prevention and control measures.</p> |  | <p>unimmunized dog (<math>p = 0.01</math>), no use of soap and water (<math>p = 0.001</math>), and no post-exposure prophylaxis (<math>p = 0.01</math>).</p> |
|--|--|--|---------------------------------------------------------------------------------------------------------------------------------------------------------------------------------------------------------------------------------------------------------------------------------------------------------------------------------------------------------------------------------------------------|--|--------------------------------------------------------------------------------------------------------------------------------------------------------------|



## Preferred Reporting Items for Systematic reviews and Meta-Analyses extension for Scoping Reviews (PRISMA-ScR) Checklist

| SECTION                                               | ITEM | PRISMA-ScR CHECKLIST ITEM                                                                                                                                                                                                                                                                                  | REPORTED ON PAGE #         |
|-------------------------------------------------------|------|------------------------------------------------------------------------------------------------------------------------------------------------------------------------------------------------------------------------------------------------------------------------------------------------------------|----------------------------|
| <b>TITLE</b>                                          |      |                                                                                                                                                                                                                                                                                                            |                            |
| Title                                                 | 1    | Identify the report as a scoping review.                                                                                                                                                                                                                                                                   | Page 1; Lines 1-2          |
| <b>ABSTRACT</b>                                       |      |                                                                                                                                                                                                                                                                                                            |                            |
| Structured summary                                    | 2    | Provide a structured summary that includes (as applicable): background, objectives, eligibility criteria, sources of evidence, charting methods, results, and conclusions that relate to the review questions and objectives.                                                                              | Page 3-4; Lines 32-57      |
| <b>INTRODUCTION</b>                                   |      |                                                                                                                                                                                                                                                                                                            |                            |
| Rationale                                             | 3    | Describe the rationale for the review in the context of what is already known. Explain why the review questions/objectives lend themselves to a scoping review approach.                                                                                                                                   | Page 6-11; Lines 77-207    |
| Objectives                                            | 4    | Provide an explicit statement of the questions and objectives being addressed with reference to their key elements (e.g., population or participants, concepts, and context) or other relevant key elements used to conceptualize the review questions and/or objectives.                                  | Page 11; Lines 199-207     |
| <b>METHODS</b>                                        |      |                                                                                                                                                                                                                                                                                                            |                            |
| Protocol and registration                             | 5    | Indicate whether a review protocol exists; state if and where it can be accessed (e.g., a Web address); and if available, provide registration information, including the registration number.                                                                                                             | Not applicable             |
| Eligibility criteria                                  | 6    | Specify characteristics of the sources of evidence used as eligibility criteria (e.g., years considered, language, and publication status), and provide a rationale.                                                                                                                                       | Page 12; Lines 214-220     |
| Information sources*                                  | 7    | Describe all information sources in the search (e.g., databases with dates of coverage and contact with authors to identify additional sources), as well as the date the most recent search was executed.                                                                                                  | Page 12; Lines 222-224     |
| Search                                                | 8    | Present the full electronic search strategy for at least 1 database, including any limits used, such that it could be repeated.                                                                                                                                                                            | Page 12; Lines 225-226     |
| Selection of sources of evidence†                     | 9    | State the process for selecting sources of evidence (i.e., screening and eligibility) included in the scoping review.                                                                                                                                                                                      | Pages 12-13; Lines 226-230 |
| Data charting process‡                                | 10   | Describe the methods of charting data from the included sources of evidence (e.g., calibrated forms or forms that have been tested by the team before their use, and whether data charting was done independently or in duplicate) and any processes for obtaining and confirming data from investigators. | Page 13; Lines 232-250     |
| Data items                                            | 11   | List and define all variables for which data were sought and any assumptions and simplifications made.                                                                                                                                                                                                     | Page 14; Lines 251-260     |
| Critical appraisal of individual sources of evidence§ | 12   | If done, provide a rationale for conducting a critical appraisal of included sources of evidence; describe the methods used and how this information was used in any data synthesis (if appropriate).                                                                                                      | Page 14; Lines 261-263     |
| Synthesis of results                                  | 13   | Describe the methods of handling and summarizing the                                                                                                                                                                                                                                                       | Page 14;                   |

| SECTION                                       | ITEM | PRISMA-ScR CHECKLIST ITEM                                                                                                                                                                       | REPORTED ON PAGE #        |
|-----------------------------------------------|------|-------------------------------------------------------------------------------------------------------------------------------------------------------------------------------------------------|---------------------------|
|                                               |      | data that were charted.                                                                                                                                                                         | Lines 264-270             |
| <b>RESULTS</b>                                |      |                                                                                                                                                                                                 |                           |
| Selection of sources of evidence              | 14   | Give numbers of sources of evidence screened, assessed for eligibility, and included in the review, with reasons for exclusions at each stage, ideally using a flow diagram.                    | Page 15; Lines 273-278    |
| Characteristics of sources of evidence        | 15   | For each source of evidence, present characteristics for which data were charted and provide the citations.                                                                                     | Page 16; Lines 280-314    |
| Critical appraisal within sources of evidence | 16   | If done, present data on critical appraisal of included sources of evidence (see item 12).                                                                                                      | Not applicable            |
| Results of individual sources of evidence     | 17   | For each included source of evidence, present the relevant data that were charted that relate to the review questions and objectives.                                                           | page 60-73                |
| Synthesis of results                          | 18   | Summarize and/or present the charting results as they relate to the review questions and objectives.                                                                                            | Page 17-34; Lines 316-533 |
| <b>DISCUSSION</b>                             |      |                                                                                                                                                                                                 |                           |
| Summary of evidence                           | 19   | Summarize the main results (including an overview of concepts, themes, and types of evidence available), link to the review questions and objectives, and consider the relevance to key groups. | Page 35-41; Lines 534-679 |
| Limitations                                   | 20   | Discuss the limitations of the scoping review process.                                                                                                                                          | Page 5; Lines 66-75       |
| Conclusions                                   | 21   | Provide a general interpretation of the results with respect to the review questions and objectives, as well as potential implications and/or next steps.                                       | Page 41-42; Lines 680-710 |
| <b>FUNDING</b>                                |      |                                                                                                                                                                                                 |                           |
| Funding                                       | 22   | Describe sources of funding for the included sources of evidence, as well as sources of funding for the scoping review. Describe the role of the funders of the scoping review.                 | Page 41; Line 728         |

JBI = Joanna Briggs Institute; PRISMA-ScR = Preferred Reporting Items for Systematic reviews and Meta-Analyses extension for Scoping Reviews.

\* Where *sources of evidence* (see second footnote) are compiled from, such as bibliographic databases, social media platforms, and Web sites.

† A more inclusive/heterogeneous term used to account for the different types of evidence or data sources (e.g., quantitative and/or qualitative research, expert opinion, and policy documents) that may be eligible in a scoping review as opposed to only studies. This is not to be confused with *information sources* (see first footnote).

‡ The frameworks by Arksey and O'Malley (6) and Levac and colleagues (7) and the JBI guidance (4, 5) refer to the process of data extraction in a scoping review as data charting.

§ The process of systematically examining research evidence to assess its validity, results, and relevance before using it to inform a decision. This term is used for items 12 and 19 instead of "risk of bias" (which is more applicable to systematic reviews of interventions) to include and acknowledge the various sources of evidence that may be used in a scoping review (e.g., quantitative and/or qualitative research, expert opinion, and policy document).

From: Tricco AC, Lillie E, Zarin W, O'Brien KK, Colquhoun H, Levac D, et al. PRISMA Extension for Scoping Reviews (PRISMA-ScR): Checklist and Explanation. *Ann Intern Med.* 2018;169:467-473. doi: [10.7326/M18-0850](https://doi.org/10.7326/M18-0850).



Supplement: bmjopen-2020-048551.draft_revisions.pdf [file bmjopen-2020-048551.draft_revisions.pdf]
