# Supplementary material for: Rabies mortality and morbidity associated with animal bites in Africa: a case for integrated rabies disease surveillance, prevention and control: a scoping review
Source: PubMed Central journal article supplement — BMJ Open. 2021 Dec 2;11(12):e048551. doi: 10.1136/bmjopen-2020-048551 (PMC8640643; doi:10.1136/bmjopen-2020-048551), 2021-12-02
Supplement: bmjopen-2020-048551supp002.pdf [file bmjopen-2020-048551supp002.pdf]

## Supplementary material 1

### Search Strategy:

Database: Ovid MEDLINE(R) and Epub Ahead of Print, In-Process & Other Non-Indexed Citations, Daily and Versions(R) <1946 to May 25, 2020>

- 
- 1 exp rabies/ or exp Rabies virus/ or rabies.mp.
  - 2 africa\*.mp. or exp Africa/
  - 3 (Algeria or Angola or Benin or Botswana or Burkina Faso or Burundi or Cameroon or Cape Verde or "Central African republic" or Chad or Comoros or Congo or "Democratic Republic of Congo" or DRC or Djibouti or Equatorial guinea or Egypt or Eritrea or Ethiopia or Gabon or Gambia or Ghana or Guinea or Bissau or Ivory coast or ""Cote d ivoire" or Jamahiriya or Kenya or Lesotho or Liberia or Libya or Madagascar or Malawi or Mali or Mauritania or Mauritius or Mayotte or Morocco or Mozambique or Namibia or Niger or Nigeria or Principe or Reunion or Rhodesia or Rwanda or "Sao Tome" or Senegal or Seychelles or "Sierra Leone" or Somalia or "South Africa" or "St Helena" or Sudan or Swaziland or Tanzania or Togo or Tunisia or Uganda or Zaire or Zambia or Zimbabwe or "Central Africa" or "West Africa" or "East Africa" or "Southern Africa" or South Africa).mp.
  - 4 2 or 3
  - 5 1 and 4
  - 6 mortality/ or mortality.mp.
  - 7 fatality.mp.
  - 8 morbidity.mp. or Morbidity/
  - 9 surveillance.mp. or Population Surveillance/
  - 10 (vaccine or vaccines).mp. or Vaccination/
  - 11 6 or 7 or 8 or 9 or 10
  - 12 Rabies Vaccines/
  - 13 5 and 11
  - 14 4 and 12

2

15 13 or 14

16 limit 15 to english language
